# Supplementary material for: The economic burden of infections following intramedullary nailing for a tibial shaft fracture in England
Source: PubMed Central journal article supplement — BMJ Open. 2020 Aug 26;10(8):e035404. doi: 10.1136/bmjopen-2019-035404 (PMC7451536; doi:10.1136/bmjopen-2019-035404), 2020-08-26
Supplement: bmjopen-2019-035404.draft_revisions.pdf [file bmjopen-2019-035404.draft_revisions.pdf]

# BMJ Open

BMJ Open is committed to open peer review. As part of this commitment we make the peer review history of every article we publish publicly available.

When an article is published we post the peer reviewers' comments and the authors' responses online. We also post the versions of the paper that were used during peer review. These are the versions that the peer review comments apply to.

The versions of the paper that follow are the versions that were submitted during the peer review process. They are not the versions of record or the final published versions. They should not be cited or distributed as the published version of this manuscript.

BMJ Open is an open access journal and the full, final, typeset and author-corrected version of record of the manuscript is available on our site with no access controls, subscription charges or pay-per-view fees (<http://bmjopen.bmj.com>).

If you have any questions on BMJ Open's open peer review process please email [info.bmjopen@bmj.com](mailto:info.bmjopen@bmj.com)

# BMJ Open

**A retrospective, longitudinal study of the healthcare resource utilisation and costs among patients with and without infection following intramedullary nailing for a tibial shaft fracture in England**

|                               |                                                                                                                                                                                                                                                                                                                                                                                                                              |
|-------------------------------|------------------------------------------------------------------------------------------------------------------------------------------------------------------------------------------------------------------------------------------------------------------------------------------------------------------------------------------------------------------------------------------------------------------------------|
| Journal:                      | <i>BMJ Open</i>                                                                                                                                                                                                                                                                                                                                                                                                              |
| Manuscript ID                 | bmjopen-2019-035404                                                                                                                                                                                                                                                                                                                                                                                                          |
| Article Type:                 | Original research                                                                                                                                                                                                                                                                                                                                                                                                            |
| Date Submitted by the Author: | 30-Oct-2019                                                                                                                                                                                                                                                                                                                                                                                                                  |
| Complete List of Authors:     | Galvain, Thibaut; Johnson and Johnson Medical SAS, Chitnis, Abhishek ; Johnson and Johnson Paparouni, Konstantina; Synthes GmbH<br>Tong, Cindy; Johnson and Johnson Medical Devices, HEMA Analytics<br>Holy, Chantal; Johnson & Johnson, Real World Analytics and Research<br>Giannoudis, Peter; Leeds Teaching Hospitals NHS Trust, Academic Department of Trauma and Orthopaedics; University of Leeds, School of Medicine |
| Keywords:                     | ACCIDENT & EMERGENCY MEDICINE, WOUND MANAGEMENT, TRAUMA MANAGEMENT, EPIDEMIOLOGY, HEALTH ECONOMICS, Infection control < INFECTIOUS DISEASES                                                                                                                                                                                                                                                                                  |
|                               |                                                                                                                                                                                                                                                                                                                                                                                                                              |

SCHOLARONE™  
Manuscripts

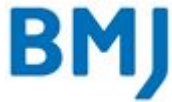

I, the Submitting Author has the right to grant and does grant on behalf of all authors of the Work (as defined in the below author licence), an exclusive licence and/or a non-exclusive licence for contributions from authors who are: i) UK Crown employees; ii) where BMJ has agreed a CC-BY licence shall apply, and/or iii) in accordance with the terms applicable for US Federal Government officers or employees acting as part of their official duties; on a worldwide, perpetual, irrevocable, royalty-free basis to BMJ Publishing Group Ltd ("BMJ") its licensees and where the relevant Journal is co-owned by BMJ to the co-owners of the Journal, to publish the Work in this journal and any other BMJ products and to exploit all rights, as set out in our [licence](#).

The Submitting Author accepts and understands that any supply made under these terms is made by BMJ to the Submitting Author unless you are acting as an employee on behalf of your employer or a postgraduate student of an affiliated institution which is paying any applicable article publishing charge ("APC") for Open Access articles. Where the Submitting Author wishes to make the Work available on an Open Access basis (and intends to pay the relevant APC), the terms of reuse of such Open Access shall be governed by a Creative Commons licence – details of these licences and which [Creative Commons](#) licence will apply to this Work are set out in our licence referred to above.

Other than as permitted in any relevant BMJ Author's Self Archiving Policies, I confirm this Work has not been accepted for publication elsewhere, is not being considered for publication elsewhere and does not duplicate material already published. I confirm all authors consent to publication of this Work and authorise the granting of this licence.

1  
2  
3 1 **Title: A retrospective, longitudinal study of the healthcare resource utilisation and costs**  
4  
5 2 **among patients with and without infection following intramedullary nailing for a tibial**  
6  
7 3 **shaft fracture in England**

9 4 Thibault Galvain,<sup>1†</sup> Abhishek Chitnis,<sup>2</sup> Konstantina Paparouni,<sup>3</sup> Cindy Tong,<sup>4</sup> Chantal Holy,<sup>2</sup>

11 5 Peter V Giannoudis<sup>5</sup>

13 6 1. Johnson & Johnson Medical SAS, 1 rue Camille Desmoulins, 92130, Issy-les-Moulineaux,

15 7 France. [tgalvain@its.jnj.com](mailto:tgalvain@its.jnj.com)

18 8 2. Johnson & Johnson, Real World Analytics and Research, New Brunswick, NJ, USA.

20 9 [achitni@its.jnj.com](mailto:achitni@its.jnj.com), [CHoly1@its.jnj.com](mailto:CHoly1@its.jnj.com)

22 10 3. Synthes GmbH, Luzernstrasse 21, 4528 Zuchwil, Switzerland. [kpaparou@its.jnj.com](mailto:kpaparou@its.jnj.com)

24 11 4. Johnson & Johnson Medical Devices, HEMA Analytics, Somerville, NJ, USA.

26 12 [stong2@its.jnj.com](mailto:stong2@its.jnj.com)

28 13 5. Academic Department of Trauma and Orthopaedics, Leeds Teaching Hospitals, School of

30 14 Medicine, University of Leeds, Leeds, United Kingdom; NIHR Leeds Biomedical Research

32 15 Centre, Chapel Allerton Hospital, Leeds, UK. [pgiannoudi@aol.com](mailto:pgiannoudi@aol.com)

34 16 †Corresponding author

37  
38 17 **Running head:**

39  
40 18 Resource use and costs in patients with and without infection after tibial fracture nailing

42  
43 19 **Key words:**

- 44  
45 20 • Tibial shaft fracture
- 46  
47 21 • CPRD
- 48  
49 22 • HES
- 50  
51 23 • Infection
- 52  
53 24 • Cost
- 54  
55 25 • England

1  
2  
3  
4  
5  
6  
7  
8  
9  
10  
11  
12  
13  
14  
15  
16  
17  
18  
19  
20  
21  
22  
23  
24  
25  
26  
27  
28  
29  
30  
31  
32  
33  
34  
35  
36  
37  
38  
39  
40  
41  
42  
43  
44  
45  
46  
47  
48  
49  
50  
51  
52  
53  
54  
55  
56  
57  
58  
59  
60

26  
27  
28

- Trauma
- Burden of disease

For peer review only

1  
2  
3 **29 Abstract**  
4

5  
6 **30 Objectives**  
7

8 31 To determine the impact of infections on direct costs and healthcare resource use in England for  
9  
10 32 patients undergoing intramedullary nailing (IMN) for tibial shaft fractures.  
11  
12

13 **33 Design**  
14

15 34 A retrospective longitudinal (2 year) cohort study.  
16  
17

18 **35 Setting**  
19

20 36 England.  
21  
22

23 **37 Participants**  
24

25  
26 38 The study population included adult patients ( $\geq 18$  years) in England with a diagnosis of tibial  
27  
28 39 shaft fracture (ICD-10, S822) in the inpatient setting between May 2003 and June 2017 followed  
29  
30 40 by a procedure for IMN for tibial shaft fracture within 30 days. Patient data were derived from  
31  
32 41 the Clinical Practice Research Datalink (CPRD) linked to NHS Hospital Episode Statistics  
33  
34 42 datasets.  
35  
36

37 **43 Primary independent variable**  
38

39 44 Infection.  
40  
41

42 **45 Primary and secondary outcome measures**  
43  
44

45 46 The primary outcome measure was total inpatient costs from index stay admission through one-  
46  
47 47 year of follow-up. Secondary outcome measures included cumulative total healthcare costs, and  
48  
49 48 resource utilisation at 30 days, 90 days, 1 year and 2 years.  
50  
51  
52  
53  
54  
55  
56  
57  
58  
59  
60

## 49 **Results**

50 805 patients met the inclusion criteria. At the index inpatient stay, 3.7% had a post IMN  
51 infection, rising to 11.7% at 1-year. One-year inpatient costs were 80% higher for patients with  
52 infection ( $p < 0.001$ ). Total costs were estimated to be £14,756 (95% confidence interval [CI];  
53 £13,123, £16,593) for patients with infection versus £8,279 (95% CI; £7,946, £8,626). Length of  
54 stay (LOS), readmission, and reoperation were the key drivers of healthcare costs (all  $p < 0.001$ ).  
55 After adjustment, LOS was higher by 109% (95% CI: 62%, 169%), from 10.5 days to 21.9 days,  
56 for patients with infection. The odds of being readmitted or requiring reoperation were higher by  
57 5.18 times (95% CI: 3.01, 9.13) and 2.47 times (95% CI: 1.48, 4.09), respectively, for patients  
58 with infection versus those without infection.

## 59 **Conclusions**

60 Post IMN infection significantly increases inpatient costs, LOS, readmissions, and reoperations  
61 associated with tibial fracture fixation. Healthcare burden could be reduced through novel  
62 surgical site infection prevention strategies.

## 63 **Strengths and limitations of this study**

- 64 • This is the first study to quantify the healthcare resource burden of infections following  
65 tibial shaft fractures treated with intramedullary nailing in England.
- 66 • The study had a long term and cross-sector perspective that included inpatient, hospital  
67 outpatient and primary care parameters.
- 68 • This study only considered patients with complete follow-up, thus excluding very severe  
69 patients with short life expectancy.
- 70 • Some costs were not directly available from the CPRD dataset and were sourced from  
71 published national sources.

- 1  
2  
3 72 • The study relied on clinical codes to identify superficial and deep infections which may  
4  
5 73 be subject to coding errors and misclassifications.  
6  
7

## 8 74 **Introduction**

9

10 75 Tibial shaft fractures are the most common type of long-bone fracture. They can be either  
11  
12 76 closed fractures, where the skin remains intact, or open fractures (accounting for 25% of all  
13  
14 77 tibial shaft fractures) where the skin is broken (1).  
15  
16

17 78 Intramedullary nailing is a common surgical treatment for the fixation of the fractured bone: an  
18  
19 79 intramedullary nail is inserted through the top of the tibia, into the inner cavity, and held in place  
20  
21 80 with screws (1). Nailing allows preservation of the soft tissues surrounding the fracture site (1),  
22  
23 81 and provides the greatest mechanical stability (2). In addition, as the nail is load-sharing rather  
24  
25 82 than load-bearing, intramedullary nailing permits earlier weight-bearing on the fractured limb  
26  
27 83 than other surgical treatments (3).  
28  
29

30 84 Infection after intramedullary nailing is a potential complication, especially in severe open  
31  
32 85 fractures, that can delay wound healing and fracture repair (2, 4-6). If left untreated, an infection  
33  
34 86 may lead to permanent loss of function of the affected limb (2, 4, 7). Open fractures are  
35  
36 87 especially prone to infection (over 31% of cases based on a meta-analysis (6)) due to wound  
37  
38 88 exposure to the environment with the risk of infection depending on the severity of soft tissue  
39  
40 89 damage (5). Patients with cases of extreme and uncontrollable infection may require limb  
41  
42 90 amputation to prevent deterioration and maintain quality of life (2).  
43  
44

45 91 Infections following fracture fixation are subclassified according to the depth of the infection:  
46  
47 92 superficial (subcutaneous region), deep (muscle/fascial region), or organ/space infections (8).  
48  
49 93 However, there is debate over the usefulness of these terms, as they can be arbitrary  
50  
51 94 depending on the location of an infection (7). A US study reported an infection rate of 2% after  
52  
53 95 intramedullary nailing for closed fractures compared with 7.1% for open fractures (9). A Spanish  
54  
55  
56  
57  
58  
59  
60



1  
2  
3 96 study reported an infection rate of 2.7% in closed fractures compared with 19% in open  
4  
5 97 fractures (10). In a meta-analysis of studies investigating prophylactic antibiotic use in patients  
6  
7 98 with open tibial fractures treated with intramedullary nailing, the risk of infection increased with  
8  
9 99 severity of the fracture, rising to over 31% among patients with the most severe injury (and who  
10  
11  
12 100 received systemic antibiotics only) (6).

13  
14 101 Patients who experience infection are more likely to require additional surgeries, extended  
15  
16 102 hospital stays, and extensive treatment for post-operative infection (2, 4, 5, 7). There are only a  
17  
18 103 limited number of studies, however, which compare healthcare resource utilisation and  
19  
20 104 treatment costs for tibial shaft fractures with and without post-surgical infection across Europe.  
21  
22 105 In a Belgian study, healthcare costs were five times higher and total length of hospital stay  
23  
24 106 (LOS) six times longer for open tibial shaft fracture patients with deep infection versus those  
25  
26 107 with no infection (11). In Denmark, the average direct cost of treating a severe open tibial shaft  
27  
28 108 fracture was estimated to be €49,817, increasing to €81,155 when infection occurred. In  
29  
30 109 patients treated within 7 days of their injury, infection increased the average direct cost and LOS  
31  
32 110 by 124% and 135%, respectively (12).

33  
34  
35  
36 111 The aim of this study was to determine the impact of infections on healthcare costs and  
37  
38 112 resource utilisation for patients undergoing intramedullary nailing for tibial shaft fractures from  
39  
40 113 the perspective of National Health Service (NHS) England.

## 41 42 114 **Materials and methods**

### 43 44 115 **Study design and setting**

45  
46  
47 116 This was a retrospective longitudinal cohort study of patients in England who underwent  
48  
49 117 intramedullary nailing for tibial shaft fracture (open or closed) followed-up for 2 years. Data  
50  
51 118 derived from the Clinical Practice Research Datalink (CPRD) linked to NHS Hospital Episode  
52  
53 119 Statistics (HES) and NHS Reference costs were used to calculate costs and healthcare  
54  
55  
56  
57  
58  
59  
60

1  
2  
3 120 resource utilisation associated with infections (superficial or deep) following intramedullary  
4  
5 121 nailing.  
6

7  
8 122 The CPRD database is an anonymised longitudinal dataset of over 11.3 million medical records  
9  
10 123 from over 600 primary care practices across the UK (13). It includes all visits to primary care  
11  
12 124 and other healthcare professionals, reasons for visits, diagnoses observations, medical history,  
13  
14 125 test results, referrals, and prescriptions (13). For this study, HES data relating to admissions to,  
15  
16 126 or attendances at, English NHS healthcare providers was used (HES Admitted Patient Care  
17  
18 127 data).  
19

## 20 21 128 **Patients**

22  
23  
24 129 The study population included adults (aged  $\geq 18$  years) who were diagnosed with a tibial shaft  
25  
26 130 fracture (ICD-10 code: S82.2) between May 2003 and June 2017 and who subsequently  
27  
28 131 underwent intramedullary nailing within 30 days of diagnosis. Inclusion and exclusion criteria  
29  
30 132 and patient attrition flow are depicted in Figure 1.  
31

32  
33 133 Infections were identified using clinical diagnosis codes either from the inpatient setting (ICD-10,  
34  
35 134 OPCS codes) or the primary care setting (Read codes) (See Additional file 1). Only patients with  
36  
37 135 an infection occurring on (or after) Day 2 following the index date were considered eligible for  
38  
39 136 the infection cohort, as this would exclude infections that were present pre-operatively. For  
40  
41 137 subgroup analysis, diagnosis codes were categorised into either deep or superficial infections  
42  
43 138 and open or closed fractures based on medical knowledge.  
44

## 45 46 139 **Data collection**

47  
48 140 The primary outcome of this study was total inpatient costs (Healthcare Resource Group [HRG],  
49  
50 141 unbundled HRG and specialised care) accrued beginning from index stay admission through  
51  
52 142 one-year of follow-up post-discharge from the index stay. Secondary endpoints included  
53  
54 143 cumulative total healthcare costs and resource utilisation for 30 days, 90 days, 1 year and  
55  
56  
57  
58  
59  
60

1  
2  
3 144 2 years of follow-up post discharge of the index stay. Total healthcare costs comprised  
4  
5 145 inpatient, hospital outpatient and primary care costs (consisting of consultations, prescriptions,  
6  
7 146 and tests/investigations). Healthcare resource utilisation included LOS, readmissions,  
8  
9 147 reoperations, days in intensive care unit (ICU), hospital outpatient visits, diagnostic tests, and  
10  
11 148 primary care visits. Time to infection was an additional secondary outcome.  
12  
13

#### 14 149 **Resource use and costs**

15  
16 150 Healthcare cost data were estimated based on the healthcare resource utilisation reported in  
17  
18 151 CPRD/HES and the unit cost associated with each service.  
19  
20

#### 21 152 ***Inpatient costs***

22  
23  
24 153 The 2017/2018 HRG Reference Costs Grouper software was used to generate HRG codes for  
25  
26 154 each inpatient admission (14, 15). Each HRG code was assigned an appropriate cost from NHS  
27  
28 155 Reference Costs (16), using admission method, LOS, trim point and the patient classification to  
29  
30 156 associate the relevant costs (14, 17, 18). Inpatient stays were considered as long-stays for  
31  
32 157 admissions lasting  $\geq 2$  days in line with NHS reference costs (17, 19). Unbundled HRGs were  
33  
34 158 automatically generated by the Grouper software and assigned relevant costs (16). Specialised  
35  
36 159 care episodes were identified using the Prescribed Specialised Services Tool 2017/18 software  
37  
38 160 and top-up costs were applied as a percentage increase to the HRG cost (20).  
39  
40

#### 41 161 ***Hospital outpatient costs***

42  
43  
44 162 Outpatient costs were derived from the CPRD referral file where the referral type was classified  
45  
46 163 as “outpatient” and matched against NHS reference costs for the same or closest matching  
47  
48 164 specialty (16, 18).  
49

#### 50 165 ***Primary care costs***

1  
2  
3 166 Consultations from the CPRD consultations file were categorised based on the setting (clinical,  
4  
5 167 surgery, home, telephone, administrative) and healthcare provider (doctor, nurse, other  
6  
7 168 professional). Costs were sourced from the Unit Costs of Health and Social Care (21).  
8  
9

10 169 Laboratory and diagnostic tests from the CPRD tests file were manually matched to the closest  
11  
12 170 NHS test category and assigned NHS Reference Costs (17).  
13

14 171 Medication categories were based on British National Formulary classifications as recorded in  
15  
16 172 the CPRD therapy file, and unit costs were obtained using the Prescription Cost Analysis 2017  
17  
18 173 using the mean sub-paragraph cost associated with each medication (22).  
19  
20

#### 21 174 **Follow-up period and cohort definitions**

22  
23  
24 175 Follow-up time was calculated as the difference between the index discharge date and the last  
25  
26 176 date of observation. Only patients with follow-up data at the relevant time point were included in  
27  
28 177 the analysis.  
29

#### 30 31 178 **Statistical analyses**

32  
33 179 All analyses were conducted using R Studio v3.4.3. Statistical significance was set a priori at  
34  
35 180  $p < 0.05$  (two-sided). Study variables were analysed descriptively. Time-to-infection was depicted  
36  
37 181 graphically using the Kaplan-Meier estimator. Unadjusted comparisons of patient demographics,  
38  
39 182 comorbidities, and medication use between groups were performed using t-tests for continuous  
40  
41 183 variables that were approximately normal, and Wilcoxon rank sum tests for continuous variables  
42  
43 184 that were not normally distributed. Pre-specified subgroup analyses allowed for stratification of  
44  
45 185 results according to type of fracture (open versus closed) or type of infection (superficial versus  
46  
47 186 deep).  
48  
49

50  
51 187 Generalised Linear Models were used to adjust for confounding. Covariates were identified a  
52  
53 188 priori as risk factors for the study outcomes based on clinical knowledge. A backwards stepwise  
54  
55  
56  
57  
58  
59  
60

1  
2  
3 189 procedure was applied according to Akaike information criterion. Missing data were not imputed.  
4  
5 190 Except for in the sensitivity analyses, patients with missing data were excluded from analyses.  
6  
7  
8 191 Sensitivity analyses at all time points were conducted using data from the subgroup of patients  
9  
10 192 who had complete two-year follow-up for total costs, LOS, readmission (rate and mean count),  
11  
12 193 and reoperation (rate and mean count).  
13

#### 14 194 **Patient and public Involvement**

15  
16  
17 195 Patients or the public were not involved in the design, or conduct, or reporting, or dissemination  
18  
19 196 plans of our research.  
20  
21

#### 22 197 **Results**

##### 23 24 198 **Patient baseline characteristics**

25  
26  
27 199 Of the 10,825 patients identified as having suffered a tibial shaft fracture, 3,005 received  
28  
29 200 intramedullary nailing. Of these, a total of 805 patients met the inclusion criteria and were  
30  
31 201 included in the study (Figure 1). The mean follow-up time was 4.8 years. The mean (standard  
32  
33 202 deviation [SD]) age was 40.8 (17.2) (See Table 1 for index stay; Additional file 2). A majority of  
34  
35 203 patients were male (n= 590; 73.3%) and most had suffered a closed (n=663; 82.4%) tibial shaft  
36  
37 204 fracture. Among patients with an open fracture, a significantly higher proportion of patients  
38  
39 205 (10.6%) experienced an infection compared with 2.3% of patients with a closed fracture  
40  
41 206 (p<0.001; Table 1).  
42  
43

#### 44 207 **Figure 1. Patient screening and enrolment according to the study inclusion/exclusion** 45 208 **criteria**

46 209

47  
48  
49  
50 210  
51  
52  
53  
54  
55  
56  
57  
58  
59  
60

211 **Table 1. Patient demographic and clinical characteristics (index stay and 1-year analysis**  
 212 **cohorts)**

|                                                                                          | All enrolled patients (N=805) | Index stay           |                  | p-value |
|------------------------------------------------------------------------------------------|-------------------------------|----------------------|------------------|---------|
|                                                                                          |                               | No infection (N=775) | Infection (N=30) |         |
| <b>Demographics</b>                                                                      |                               |                      |                  |         |
| Age (years), mean (SD)                                                                   | 40.8 (17.2)                   | 40.7 (16.8)          | 43.0 (23.9)      | 0.61    |
| Gender, n (%)                                                                            |                               |                      |                  | 0.84    |
| Male                                                                                     | 590 (73.3)                    | 569 (73.4)           | 21 (70.0)        |         |
| <b>Clinical history/comorbidities</b>                                                    |                               |                      |                  |         |
| Charlson score, mean (SD)                                                                | 0.04 (0.23)                   | 0.04 (0.24)          | 0.00 (0.00)      | <0.001  |
| Smoker, n (%)                                                                            | 256 (31.8)                    | 247 (31.9)           | 9 (30.0)         | 0.99    |
| Diabetes, n (%)                                                                          | 27 (3.4)                      | 27 (3.5)             | 0 (0.0)          | 0.62    |
| COPD, n (%)                                                                              | 8 (1.0)                       | 8 (1.0)              | 0 (0.0)          | 1.00    |
| Congestive heart failure, n (%)                                                          | 2 (0.3)                       | 2 (0.3)              | 0 (0.0)          | 1.00    |
| Hypertension, n (%)                                                                      | 12 (1.5)                      | 12 (1.6)             | 0 (0.0)          | 1.00    |
| Compartment syndrome, n (%)                                                              | 27 (3.4)                      | 22 (2.8)             | 5 (16.7)         | <0.01   |
| <b>Index episode</b>                                                                     |                               |                      |                  |         |
| Inpatient waiting time (days) for surgery, mean (SD)                                     | 1.4 (2.4)                     | 1.4 (2.4)            | 0.70 (2.4)       | 0.14    |
| Fracture type, n (%)                                                                     |                               |                      |                  | <0.001  |
| Open fracture                                                                            | 142 (17.6)                    | 127 (16.4)           | 15 (50.0)        |         |
| Received ≥1 prescription for antibiotics in the 12 months prior to the index stay, n (%) | 60 (7.5)                      | 60 (7.7)             | 0 (0.00)         | 0.16    |
| Received ≥1 prescription for opioids in the 12 months prior to the index stay, n (%)     | 16 (2.0)                      | 15 (1.9)             | 1 (3.3)          | 0.46    |

213 Abbreviations: COPD, chronic obstructive pulmonary disease; SD, standard deviation.

214

## 215 Infection rates

216 During the index stay, 30 patients (3.7%) experienced an infection. Among patients with 30-day,  
 217 90-day, 1-year, and 2-years post-discharge follow-up data, infection rates were respectively:  
 218 8.0%, 9.2%, 11.7%, and 13.4% (Figure 2).

## 219 Figure 2. Cumulative percentage of infection events recorded post-index date

220

## 221 One-year inpatient costs

222 Among patients with index stay plus 1-year post discharge data (N=686), the mean 1-year total  
 223 inpatient cost was significantly higher among patients who experienced an infection (£15,580;

224 n=80) compared with patients without infection (£7,746;  $p<0.001$ ). After adjusting for fracture  
 225 type (open/closed), age, smoking status, index year, diabetes, COPD, inpatient waiting time for  
 226 surgery and compartment syndrome, mean costs were 80% (95% CI: 58%, 104%) higher,  
 227 respectively (£13,672 [95% CI: £12,122, £15,420] versus £7,616 [95% CI: £7,301, £7,944];  
 228  $p<0.001$ ) (Figure 3).

### 229 **One-year total costs**

230 Adjusted total costs were £14,756 (95% CI: £13,123, £16,593) among patients who experienced  
 231 an infection versus £8,279 (95% CI: £7,946, £8,626;  $p<0.001$ ) in patients without infection – a  
 232 78% increase in total costs as a result of infection (95% CI: 57%, 102%) (Figure 3).

### 233 **Figure 3. Breakdown of 1-year total costs by infection status (adjusted analysis)**

234 Abbreviations: ns, not significant; CI, confidence interval.

235 \*\*\*  $p<0.001$

### 237 **One-year healthcare resource use**

238 For the majority of healthcare resource categories, presence of infection was associated with a  
 239 statistically significant increase in resource use versus no infection (Table 2). Key drivers of  
 240 increased costs were LOS, readmission, and reoperation rates, which were all significantly  
 241 higher in patients with infections (all  $p<0.001$ ). After adjustment, LOS was increased by 109%  
 242 (95% CI: 62%, 169%) from 10.5 days to 21.9 days. The odds of being readmitted or requiring  
 243 reoperation due to infection was increased by 5.18 times (95% CI: 3.01, 9.13) and 2.47 times  
 244 (95% CI: 1.48, 4.09), respectively.

245 **Table 2. 1-year healthcare resource use by infection status**

|           | Multivariate analysis                    |                                    |           |
|-----------|------------------------------------------|------------------------------------|-----------|
|           | No infection<br>(N=606)<br>Mean (95% CI) | Infection<br>N=80<br>Mean (95% CI) | p-value   |
| LOS, days | 10.5 (9.7, 11.4)                         | 21.9 (17.3, 27.7)                  | $p<0.001$ |

|                                         | Multivariate analysis                    |                                    |         |
|-----------------------------------------|------------------------------------------|------------------------------------|---------|
|                                         | No infection<br>(N=606)<br>Mean (95% CI) | Infection<br>N=80<br>Mean (95% CI) | p-value |
| ICU LOS, days                           | 0.01 (0.01, 0.02)                        | 0.01 (0.00, 0.02)                  | p=0.91  |
| Number of readmissions                  | 0.5 (0.5, 0.6)                           | 1.5 (1.2, 1.8)                     | p<0.001 |
| Readmission rate, %                     | 35.9 (32.1, 39.9)                        | 74.4 (63.4, 83.0)                  | p<0.001 |
| Number of reoperations                  | 0.2 (0.2, 0.3)                           | 0.6 (0.5, 0.8)                     | p<0.001 |
| Reoperations rate, %                    | 20.3 (17.2, 23.8)                        | 38.6 (28.3, 50.0)                  | p<0.001 |
| Number of hospital outpatient referrals | 1.8 (1.6, 2.1)                           | 1.7 (1.2, 2.1)                     | p=0.44  |
| Primary care resource use               |                                          |                                    |         |
| Number of primary care events           | 30.9 (29.2, 32.7)                        | 45.9 (39.0, 54.0)                  | p<0.001 |
| Number of tests and examinations        | 14.0 (11.4, 16.6)                        | 22.1 (13.9, 31.3)                  | p=0.052 |

246 Abbreviations: CI, confidence interval; ICU, intensive care unit; LOS, length of stay

### 247 Total costs from index stay to two years follow-up

248 At all time points mean total costs were statistically significantly higher for patients with an  
 249 infection compared with those without (p<0.001) (Figure 4). Adjusted mean total costs of care in  
 250 patients with infection versus no infection over time were: £11,257 versus £7,017 at 30 days;  
 251 £11,949 versus £7,423 at 90 days; and £16,626 versus £9,439 at 2 years (all p<0.001).

### 252 Figure 4. Total costs from index stay to 2 years follow-up

253 Abbreviations: CI, confidence interval.

254 \*\*\* p<0.001. Data plotted are means +/- 95% CI.

### 256 Healthcare resource use from index stay to two years follow-up

257 Multivariate analysis demonstrated that LOS, readmissions (rate and mean; Figure 5), and  
 258 reoperations (rate and mean; Figure 6), were consistently higher at all timepoints among  
 259 patients who experienced an infection compared with those who did not (p<0.001). At 30 days,  
 260 infection increased the adjusted LOS from 8.9 days to 15.0 days and at 2 years from 11.3 days  
 261 to 24.6 days (both p<0.001). The adjusted readmission rate increased from 7.1% at 30 days to  
 262 51.3% at 2 years follow-up in patients without infection compared with an increase from 44.1%



263 to 77.6% in the infection group (Figure 5). The adjusted reoperation rate increased from 1.3% at  
264 30 days to 31.2% at 2 years in the absence of infection, whereas in the infection group, the rate  
265 increased from 11.5% to 49.0% (Figure 6).

266 **Figure 5. Readmission (adjusted) according to follow-up time: (A) readmission rate and**  
267 **(B) mean number of readmissions per patient**

268  
269 Abbreviations: CI, confidence interval.

270 \*\*\*  $p < 0.001$ . Data plotted are means  $\pm$  95% CI.

271  
272 **Figure 6. Reoperation (adjusted) according to follow-up time: (A) reoperation rate and (B)**  
273 **mean number of reoperations per patient**

274  
275 Abbreviations: CI, confidence interval.

276 \*\*  $p < 0.01$ , \*\*\*  $p < 0.001$ . Data plotted are means  $\pm$  95% CI.

277  
278 **Subgroup analyses**

279 Multivariate analysis by infection type resulted in mean 1-year inpatient costs of £7,614,  
280 £12,814 and £15,513, respectively for no infection ( $n=606$ ), superficial infection ( $n=54$ ) and  
281 deep infection ( $n=26$ ) (Additional file 2). Analysis by fracture type showed a higher 1-year  
282 infection rate among patients with open fractures (27.4%) versus closed fractures (8.6%). Mean  
283 adjusted inpatient costs at 1 year for patients with and without infection were £19,542 versus  
284 £9,495 for patients with open fractures and £12,178 versus £7,278 for patients with closed  
285 fractures.

286 **Sensitivity analyses**

287 A total of 588 patients (73%) out of the 805 patients at index had data for the full 2-year follow-  
288 up period. Results for total costs, LOS, readmissions (rate and mean), and reoperations (rate

1  
2  
3 289 and mean) at each time point were consistent with those of the primary analyses (Additional file  
4  
5 290 2).

## 6 7 291 **Discussion**

8  
9  
10 292 This study used CPRD-linked HES data to determine the impact of infection on English  
11  
12 293 healthcare costs and resource utilisation associated with patients undergoing intramedullary  
13  
14 294 nailing for tibial fracture. Infection rates at 1-year and 2-years (11.7% and 13.4%, respectively)  
15  
16 295 were comparable with the 10.5% rate reported in a 2014 meta-analysis (6). Mean inpatient  
17  
18 296 costs measured after 1 year were predicted to be 80% higher (£6,056) for patients with infection  
19  
20 297 compared with those without infection, while overall costs were 78% higher. The greatest cost  
21  
22 298 drivers were hospital LOS (109% increase at 1 year), readmissions (odds of being readmitted  
23  
24 299 increased by 5.18 times at 1 year), and reoperations (odds of reoperation increased by 2.47  
25  
26 300 times at 1 year). The 2-year follow-up in this study meant that we were able to capture changes  
27  
28 301 in resource use over time associated with infection, such as readmission and reoperation. The  
29  
30 302 findings of this study highlight the substantial impact on healthcare resource utilisation and costs  
31  
32 303 to the English NHS, from both the hospital and primary care perspective.

33  
34  
35  
36 304 This study is the first to quantify the additional healthcare resource burden of infections following  
37  
38 305 tibial fractures treated with intramedullary nailing in England with a long-term perspective which  
39  
40 306 includes inpatient, hospital outpatient and primary care parameters. Differences in healthcare  
41  
42 307 systems, patient populations and treatment pathways make direct comparison with studies from  
43  
44 308 other countries challenging; however, our findings are in line with results of studies from  
45  
46 309 Belgium and Denmark (11, 12). Hoekstra et al demonstrated five times higher healthcare costs  
47  
48 310 and six times longer LOS for open tibial shaft fracture patients with deep infection versus those  
49  
50 311 without infection in Belgium (11). Although the magnitude of the increase in costs and LOS  
51  
52 312 observed in our study is not as substantial, differences in patient populations may be a  
53  
54 313 contributing factor, as Hoekstra et al. did not limit their study population to intramedullary nail

1  
2  
3 314 fixation (11). In their Danish study, Olesen et al estimated a 60% increase in direct costs and an  
4  
5 315 80% increase in LOS resulting from infected open tibial fractures (12), consistent with the  
6  
7 316 magnitude of the increase observed in the current study; absolute LOS (74 days) and direct  
8  
9 317 healthcare costs (€81,155) in the presence of infection were substantially higher than in our  
10  
11 318 study, however, which may in part reflect the most severe types of wounds considered in the  
12  
13 319 Danish study, all of which were open fractures and 80% of which were Gustilo-Anderson  
14  
15 320 classification 3.

16  
17  
18 321 This study is subject to the following limitations: 1) potential bias in the patient population as we  
19  
20 322 only considered patients with complete follow-up, thus excluding very severe patients with short  
21  
22 323 life expectancy; 2) identification of relevant patients for inclusion in the study was based on  
23  
24 324 OPCS, ICD-10 and primary care-based read codes. The data may be susceptible to coding  
25  
26 325 errors and misclassifications; 3) medication use was costed as recorded in CPRD , i.e.  
27  
28 326 averaged to the cost of the drug family/British National Formulary sub-paragraph; 4) dispensing  
29  
30 327 costs were not included 5) outpatient specialties from CPRD did not always exactly match  
31  
32 328 outpatient specialty categories from NHS Reference Costs; when there was not an exact match,  
33  
34 329 the closest matching specialty was chosen; 6) costs were not directly available from the CPRD  
35  
36 330 dataset and hence unit costs had to be sourced from published national sources for primary and  
37  
38 331 secondary care and for drug prices.

39  
40  
41  
42 332 Our study provides important evidence as to the short- to mid-term direct economic  
43  
44 333 consequences of infection following tibial fractures. By increasing the sample size, the impact of  
45  
46 334 infection type (superficial/deep) and fracture type (open/closed) could have been explored more  
47  
48 335 robustly. Additional validation of clinical codes used to identify relevant data would have allowed  
49  
50 336 us to account for any potential variation in clinical coding practice. Broadening the perspective  
51  
52 337 to include indirect costs would allow the additional burden of infection to be established, such as  
53  
54 338 rehabilitation and absenteeism.

## 339 **Conclusion**

340 This study confirms that infection presents a substantial healthcare burden, leading to  
341 significantly increased hospital LOS, need for hospital readmission and reoperation, and  
342 increased use of GPs and other primary care resources. As such there exists an unmet need for  
343 alternative medical technologies and infection prevention strategies that could help to reduce  
344 infections in tibial shaft fractures and reduce costs. Our study indicates that the potential mid-  
345 term (1–2 years) saving to the English NHS of is around £6,500 per patient.

346

## 347 **Declarations**

### 348 **Ethics approval and consent to participate**

349 The study protocol was approved by the Independent Scientific Advisory Committee for  
350 Medicines and Healthcare products Regulatory Agency database research (ISAC) on 27  
351 November 2017 (ISAC Protocol: 17-132R). General ethical approval for observational research  
352 using the CPRD with approval from the ISAC was granted by a Health Research Authority  
353 Research Ethics Committee (East Midlands – Derby; reference number: 05/MRE04/87).

### 354 **Consent for publication**

355 Not applicable

### 356 **Availability of data and material**

357 The data that support the findings of this study are available from Clinical Practice Research  
358 Datalink (CPRD) but restrictions apply to the availability of these data, which were used under  
359 license for the current study, and so are not publicly available.

### 360 **Competing interests**

361 Peter Giannoudis received honoraria from Synthes GmbH for his involvement in this study.  
362 Thibaut Galvain, Abhishek Chitnis, Cindy Tong, and Chantal Holy are employees of Johnson  
363 and Johnson. Konstantina Paparouni is an employee of Synthes GmbH.

1  
2  
3 **364 Funding**  
4

5 365 This study was sponsored by Synthes GmbH.  
6  
7

8 **366 Authors' contributions**  
9

10 367 All authors contributed to the study design, data analysis, and manuscript writing.  
11

12 **368 Acknowledgements:**  
13

14 369 We thank James Woolnough (Mtech Access) who provided medical writing services in the  
15  
16 370 preparation of the manuscript, funded by DePuy Synthes.  
17

18 **371 Abbreviations**  
19

20 372 CI, confidence interval; COPD, chronic obstructive pulmonary disease; CPRD, Clinical Practice  
21  
22 373 Research Datalink; GP, general practitioner; HES, Hospital Episode Statistics; HRG, Healthcare  
23  
24 374 Resource Group; ICU, intensive care unit; ISAC, Independent Scientific Advisory Committee;  
25  
26 375 LOS, length of stay; NA, not applicable; NHS, National Health Service; SD, standard deviation.  
27  
28

29 **376 References**  
30  
31

- 32 377 1. Duan X, Al-Qwbani M, Zeng Y, Zhang W, Xiang Z. Intramedullary nailing for tibial shaft  
33 378 fractures in adults. *Cochrane Database Syst Rev*. 2012;1:CD008241.  
34 379 2. Elniel AR, Giannoudis PV. Open fractures of the lower extremity: Current management  
35 380 and clinical outcomes. *EFORT Open Rev*. 2018;3(5):316-25.  
36 381 3. Reed LK, Mormino MA. Distal Tibia Nonunions and Malunions. *Operative Techniques in*  
37 382 *Orthopaedics*. 2008;18(2):128-35.  
38 383 4. Kanakaris NK, Tosounidis TH, Giannoudis PV. Surgical management of infected non-  
39 384 unions: An update. *Injury*. 2015;46 Suppl 5:S25-32.  
40 385 5. Smith EJ, Kuang X, Pandarinath R. Comparing hospital outcomes between open and  
41 386 closed tibia fractures treated with intramedullary fixation. *Injury*. 2017;48(7):1609-12.  
42 387 6. Craig J, Fuchs T, Jenks M, Fleetwood K, Franz D, Iff J, et al. Systematic review and  
43 388 meta-analysis of the additional benefit of local prophylactic antibiotic therapy for infection rates  
44 389 in open tibia fractures treated with intramedullary nailing. *Int Orthop*. 2014;38(5):1025-30.  
45 390 7. Morgenstern M, Moriarty TF, Kuehl R, Richards RG, McNally MA, Verhofstad MHJ, et al.  
46 391 International survey among orthopaedic trauma surgeons: Lack of a definition of fracture-related  
47 392 infection. *Injury*. 2018;49(3):491-6.  
48 393 8. Centre for Disease Control. National Healthcare Safety Network (NHSN) Patient Safety  
49 394 Component Manual,. 2018.  
50 395 9. Auston DA, Meiss J, Serrano R, Sellers T, Carlson G, Hoggard T, et al. Percutaneous or  
51 396 Open Reduction of Closed Tibial Shaft Fractures During Intramedullary Nailing Does Not  
52 397 Increase Wound Complications, Infection or Nonunion Rates. *J Orthop Trauma*.  
53 398 2017;31(4):215-9.  
54 399 10. Rubio-Suarez JC, Carbonell-Escobar R, Rodriguez-Merchan EC, Ibarzabal-Gil A, Gil-  
55 400 Garay E. Fractures of the tibial pilon treated by open reduction and internal fixation (locking  
56  
57  
58  
59  
60

- 1  
2  
3 401 compression plate-less invasive stabilising system): Complications and sequelae. Injury.  
4 402 2018;49 Suppl 2:S60-S4.
- 5 403 11. Hoekstra H, Smeets B, Metsemakers WJ, Spitz AC, Nijs S. Economics of open tibial  
6 404 fractures: the pivotal role of length-of-stay and infection. Health Econ Rev. 2017;7(1):32.
- 7 405 12. Olesen UK, Pedersen NJ, Eckardt H, Lykke-Meyer L, Bonde CT, Singh UM, et al. The  
8 406 cost of infection in severe open tibial fractures treated with a free flap. Int Orthop.  
9 407 2017;41(5):1049-55.
- 10 408 13. Herrett E, Gallagher AM, Bhaskaran K, Forbes H, Mathur R, van Staa T, et al. Data  
11 409 Resource Profile: Clinical Practice Research Datalink (CPRD). Int J Epidemiol. 2015;44(3):827-  
12 410 36.
- 13 411 14. Canavan C, West J, Card T. Calculating Total Health Service Utilisation and Costs from  
14 412 Routinely Collected Electronic Health Records Using the Example of Patients with Irritable  
15 413 Bowel Syndrome Before and After Their First Gastroenterology Appointment.  
16 414 Pharmacoconomics. 2016;34(2):181-94.
- 17 415 15. National Health Service. Costing - HRG4+ 2017/18 Reference Costs Grouper 2017  
18 416 [Available from: [https://digital.nhs.uk/services/national-casemix-office/downloads-grouper-and-  
19 417 tools/costing-hrg4-2017-18-reference-costs-grouper](https://digital.nhs.uk/services/national-casemix-office/downloads-grouper-and-tools/costing-hrg4-2017-18-reference-costs-grouper).
- 20 418 16. NHS Improvement. National schedule of reference costs 2016/17 2017 [Available from:  
21 419 <https://improvement.nhs.uk/resources/reference-costs/>.
- 22 420 17. Achana FA, Fleming KM, Tata LJ, Sultan AA, Petrou S. Peripartum hysterectomy: an  
23 421 economic analysis of direct healthcare costs using routinely collected data. BJOG.  
24 422 2018;125(7):874-83.
- 25 423 18. Danese MD, Gleeson M, Griffiths RI, Catterick D, Kutikova L. Methods for estimating  
26 424 costs in patients with hyperlipidemia experiencing their first cardiovascular event in the United  
27 425 Kingdom. J Med Econ. 2017;20(9):931-7.
- 28 426 19. NHS Department of Health. A simple guide to Payment by Results. 2012.
- 29 427 20. NHS England and NHS Improvement. NHS National tariff payment system 2017/18 and  
30 428 2018/19.
- 31 429 21. Curtis L, Burns A. Unit Costs of Health and Social Care 2017. Available at:  
32 430 <https://www.pssru.ac.uk/project-pages/unit-costs/unit-costs-2017/> (Accessed: 9 Nov 2018).
- 33 431 22. NHS Digital. Prescription Cost Analysis - England, 2017 2018 [Available from:  
34 432 [https://digital.nhs.uk/data-and-information/publications/statistical/prescription-cost-  
35 433 analysis/prescription-cost-analysis-england-2017](https://digital.nhs.uk/data-and-information/publications/statistical/prescription-cost-analysis/prescription-cost-analysis-england-2017).
- 36  
37  
38  
39  
40

## 41 435 Additional files

### 42 436 1. Additional file 1:

- 43 437 a. Format: "Additional file1.docx"
- 44 438 b. Title: Study protocol
- 45 439 c. Description: this additional file includes the study protocol and its appendix  
46 440 composed of clinical and procedure codes

### 47 441 2. Additional file 2:

- 48 442 a. Format: "Additional file2.docx"
- 49  
50  
51  
52  
53  
54  
55  
56  
57  
58  
59  
60

1  
2  
3  
4  
5  
6  
7  
8  
9  
10  
11  
12  
13  
14  
15  
16  
17  
18  
19  
20  
21  
22  
23  
24  
25  
26  
27  
28  
29  
30  
31  
32  
33  
34  
35  
36  
37  
38  
39  
40  
41  
42  
43  
44  
45  
46  
47  
48  
49  
50  
51  
52  
53  
54  
55  
56  
57  
58  
59  
60

- 443            b. Title: Baseline and results at all time points
- 444            c. Description: this additional file includes the baseline demographics and results at
- 445            all time points that could not be integrated in the manuscript.

For peer review only

1  
2  
3  
4  
5  
6  
7  
8  
9  
10  
11  
12  
13  
14  
15  
16  
17  
18  
19  
20  
21  
22  
23  
24  
25  
26  
27  
28  
29  
30  
31  
32  
33  
34  
35  
36  
37  
38  
39  
40  
41  
42  
43  
44  
45  
46  
47  
48  
49  
50  
51  
52  
53  
54  
55  
56  
57  
58  
59  
60

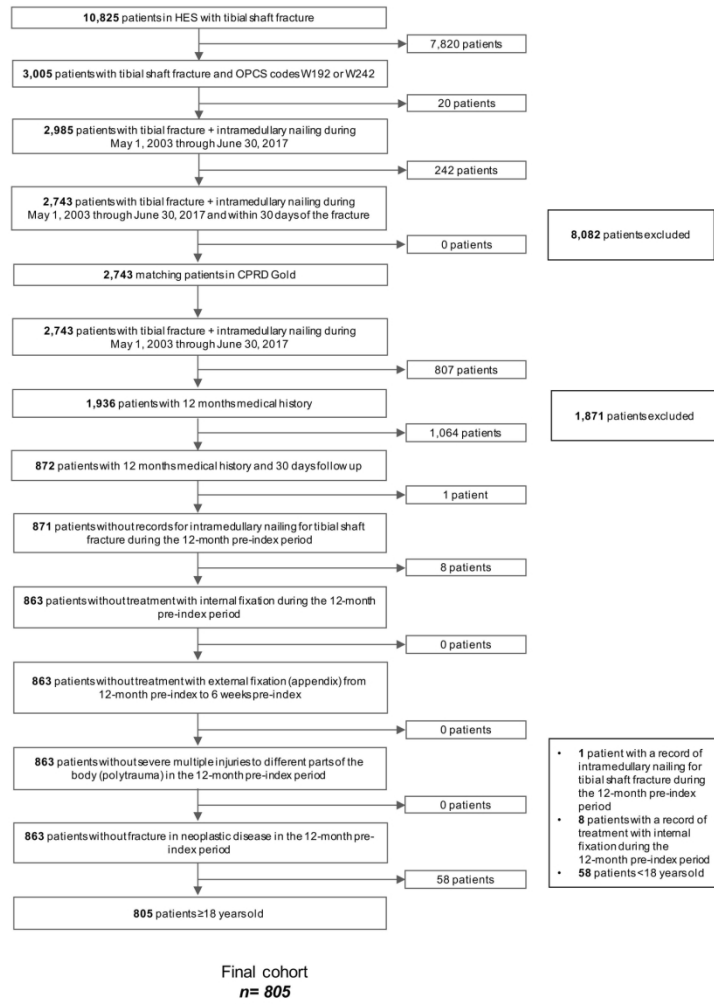

74x105mm (600 x 600 DPI)



1  
2  
3  
4  
5  
6  
7  
8  
9  
10  
11  
12  
13  
14  
15  
16  
17  
18  
19  
20  
21  
22  
23  
24  
25  
26  
27  
28  
29  
30  
31  
32  
33  
34  
35  
36  
37  
38  
39  
40  
41  
42  
43  
44  
45  
46  
47  
48  
49  
50  
51  
52  
53  
54  
55  
56  
57  
58  
59  
60

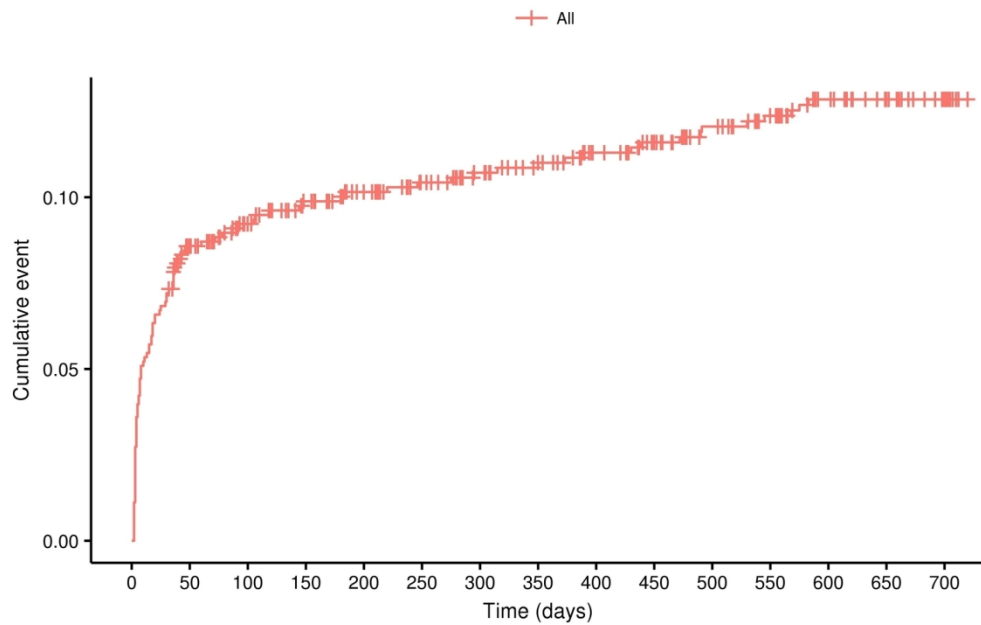

152x101mm (300 x 300 DPI)

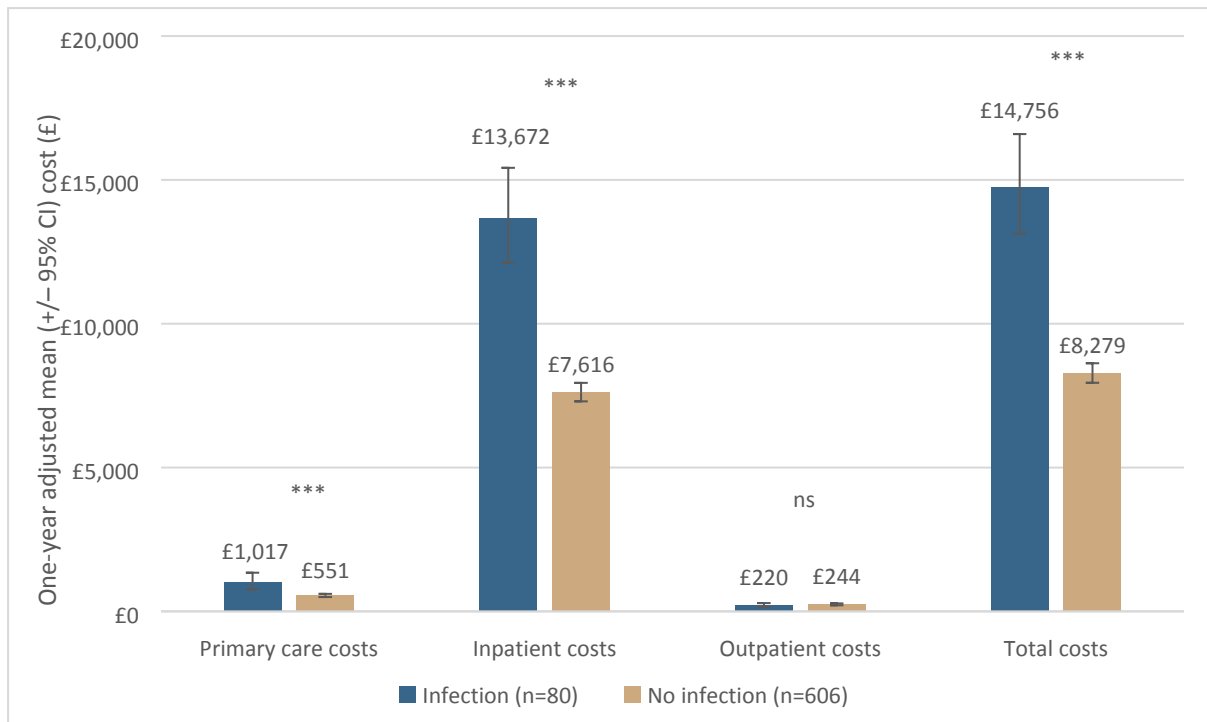

1  
2  
3  
4  
5  
6  
7  
8  
9  
10  
11  
12  
13  
14  
15  
16  
17  
18  
19  
20  
21  
22  
23  
24  
25  
26  
27  
28  
29  
30  
31  
32  
33  
34  
35  
36  
37  
38  
39  
40  
41  
42  
43  
44  
45  
46  
47  
48  
49  
50  
51  
52  
53  
54  
55  
56  
57  
58  
59  
60

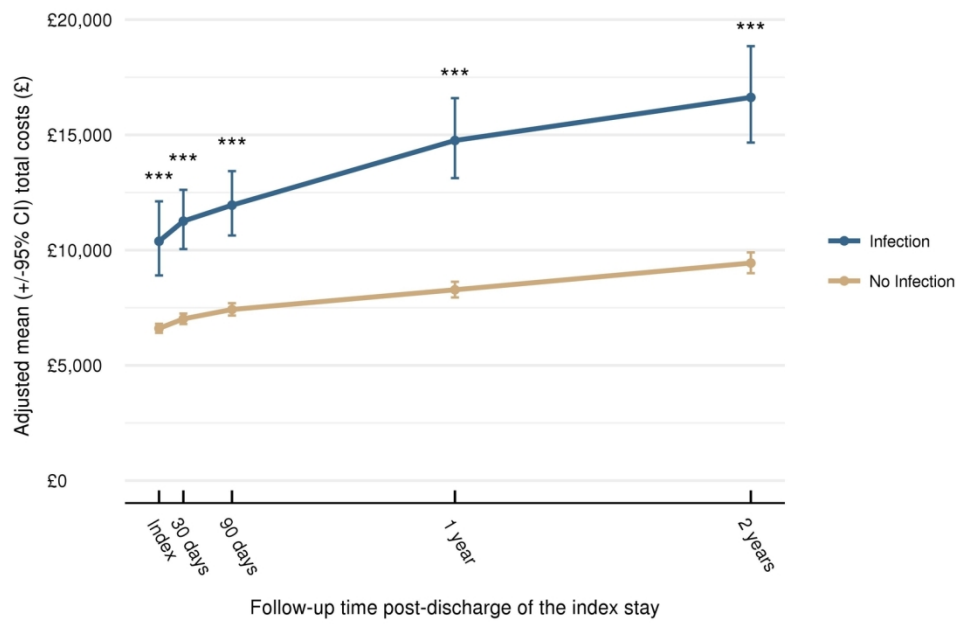

Abbreviations: CI, confidence interval. \*\*\* p<0.001. Data plotted are means +/- 95% CI.

152x101mm (300 x 300 DPI)

Figure 5A

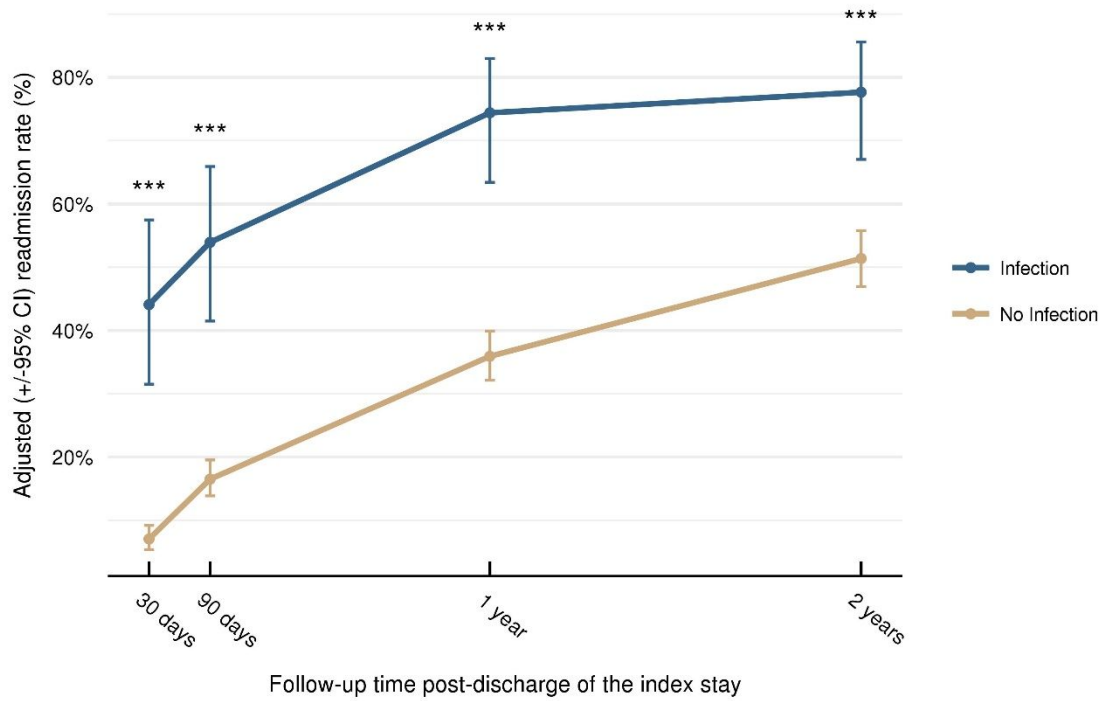

Figure 5B

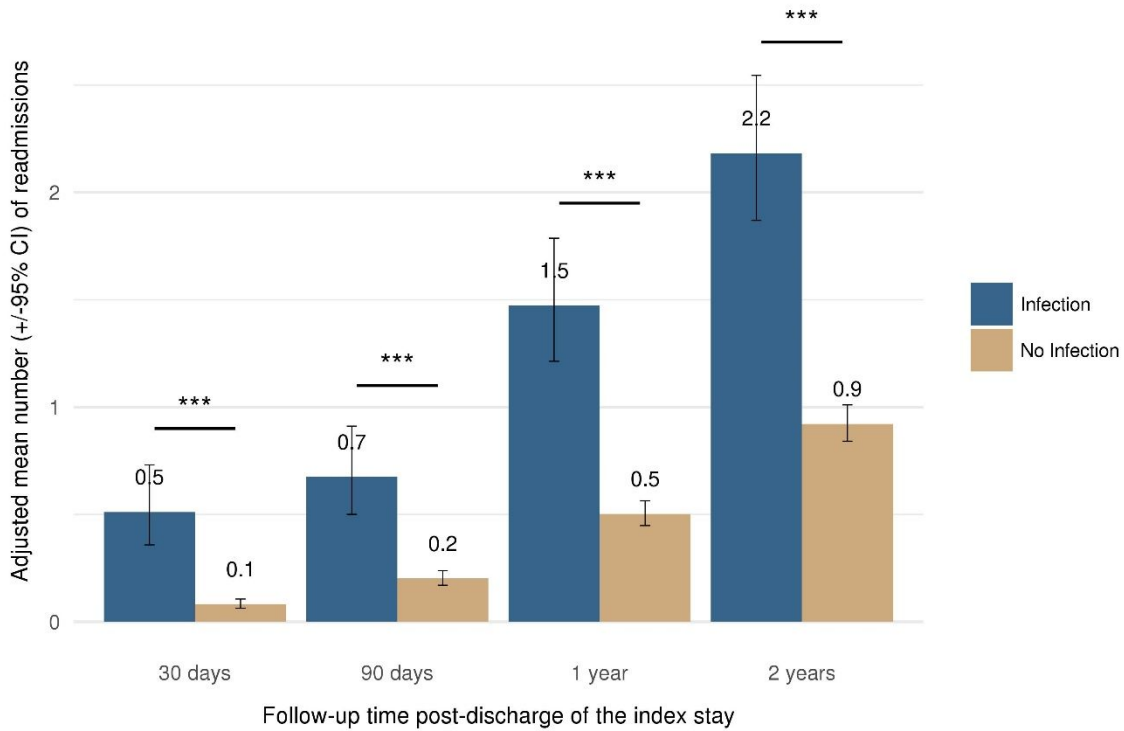

Figure 6A

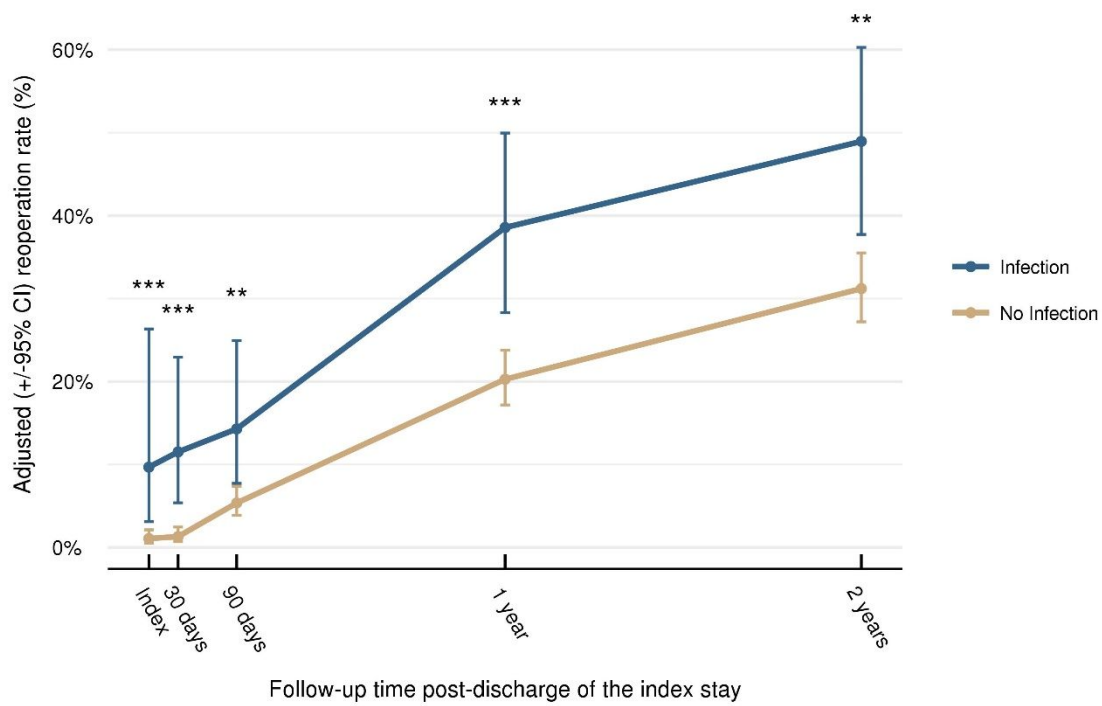

Figure 6B

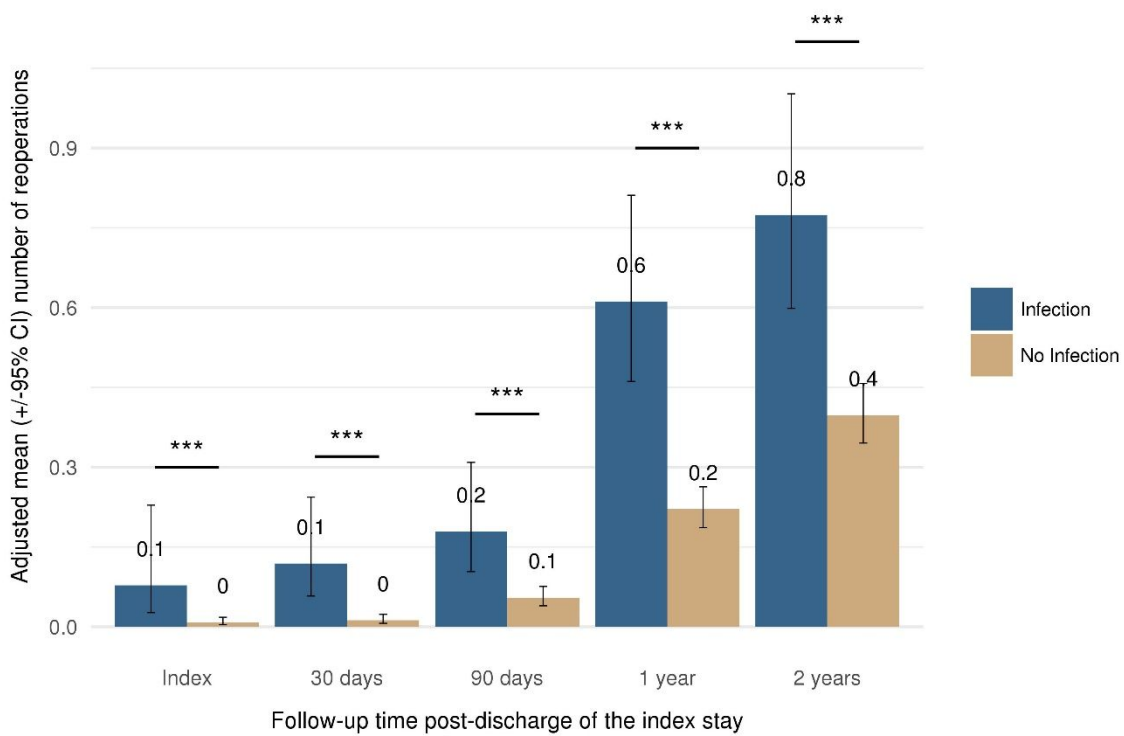

## Additional file 1: Study protocol

### PROTOCOL INFORMATION REQUIRED

The following sections below **must** be included in the CPRD ISAC research protocol. Please refer to the guidance on 'Contents of CPRD ISAC Research Protocols' ([www.cprd.com/isac](http://www.cprd.com/isac)) for more information on how to complete the sections below. Pages should be numbered. All abbreviations must be defined on first use.

**Applicants must complete all sections listed below**  
**Sections which do not apply should be completed as 'Not Applicable'**

#### A. Study Title<sup>§</sup>

*§Please note: This information will be published on CPRD's website as part of its transparency policy*

Healthcare Resource Utilization and Costs among Patients with and without Infection after Intramedullary Nailing for A Tibial Shaft Fracture

#### B. Lay Summary (Max. 200 words)<sup>§</sup>

*§Please note: This information will be published on CPRD's website as part of its transparency policy*

Tibial shaft fractures are the most common long bone fracture of the lower limbs. Intramedullary nailing is the most frequent surgical treatment for tibial shaft fractures. In patients with tibial shaft fractures, infection is an important complication as about 15% of these fractures are open injuries. Such infections may lead to devastating consequences such as increase in length of hospital stay, readmissions, prolonged medication treatment and reoperations along with high use of medical resources and costs. However, the healthcare burden among patients developing an infection in tibial shaft fracture is not well documented. Consequently, this study seeks to understand the impact of infection after intramedullary nailing in patients with tibial shaft fractures on healthcare use and cost of care.

#### C. Technical Summary (Max. 200 words)<sup>§</sup>

*§Please note: This information will be published on CPRD's website as part of its transparency policy*

The objective of this retrospective longitudinal cohort study is primarily designed to determine short (30-day, 90-day) and mid-term (one-year, two-year) healthcare resource utilization (HRU) and costs among patients with deep and superficial infections versus those without following intramedullary nailing for a tibial shaft fracture. Patients with tibial shaft fracture treated with intramedullary nailing between 2011 and 2016 will be selected. The main exposure variable will include deep infection versus superficial surgical site infection or no infection. Analyses will be both descriptive and comparative using multivariable models. The multivariable models will include generalized linear models (GLMs) based on the outcome variable of interest for HRU and costs and will adjust for patient characteristics.

1  
2  
3  
4  
5  
6  
7  
8  
9  
10  
11  
12  
13  
14  
15  
16  
17  
18  
19  
20  
21  
22  
23  
24  
25  
26  
27  
28  
29  
30  
31  
32  
33  
34  
35  
36  
37  
38  
39  
40  
41  
42  
43  
44  
45  
46  
47  
48  
49  
50  
51  
52  
53  
54  
55  
56  
57  
58  
59  
60

**Applicants must complete all sections listed below**  
**Sections which do not apply should be completed as 'Not Applicable'**

#### **D. Objectives, Specific Aims and Rationale**

##### Broad Research Objectives

To evaluate the impact of developing infection in patients with intramedullary nailing for tibial shaft fractures on healthcare utilization and cost of care.

##### Specific Aims

1. To determine short (30-day, 90-day) and mid-term (one-year, two-year) Costs and HRU among patients with deep infection and superficial infections versus patients without an infection following tibial shaft fracture treated with nailing.

##### Rationale

This study seeks to understand the impact of post-surgical infection in patients with intramedullary nailing for tibial shaft fractures on cost of care and healthcare utilization.

#### **E. Study Background**

Infections remains a feared complication in orthopaedic and trauma surgery due to its potentially devastating consequences for patients. It has also been associated with an increase in medical resource utilization and treatment costs due to increased length of hospital stay, readmissions, prolonged pharmacological treatment and reoperations.<sup>1-6</sup> Deep infections defined as infections involving deeper tissues such as muscular fascia and bone<sup>7</sup> have been associated with a significant economic burden for healthcare systems. Data from long bone fracture reduction, hip replacement or hemiarthroplasty or screw fixation for proximal humeral fractures and knee arthroplasty, consistently reported 2-3 times higher treatment costs for patients that developed an infection compared to those that did not.<sup>1-6</sup>

Tibial shaft fractures are the most common long bone fracture of the lower limbs.<sup>8</sup> In patients with tibial shaft fractures, infection is an important complication as about 15% of these fractures are open injuries. Infection may lead to prolonged treatment, compromised clinical outcomes and in some cases, even limb amputation.<sup>9-12</sup> In the European setting there is limited data available with respect to the actual cost of treatment. In a Danish study on patients with open tibia fractures treated with a free flap, the presence of an infection increased the mean length of hospital stay from 28 to 63.8 days and the mean treatment costs from €49,301 to €67,958 for infected compared to uninfected fractures.<sup>13</sup> A study from the UK reported the mean length of stay and treatment costs of patients with tibial osteomyelitis. For patients treated with limb salvage procedures alone, length of stay was 15 days (10-27) and corresponding treatment costs were € 16,718 while for patients, whose treatment ended up in amputation length of stay was 13 days (8-17) and treatment costs were €18,441.<sup>14</sup>

Intramedullary nailing is the preferred surgical treatment in patients with tibial shaft fractures. The impact of the development of an infection on short and mid-term post-operative medical resource utilization is not well documented. While literature from clinical trials provides some insight into infection incidence rates, the treatment pathway and treatment success/failure rates, there is a lack of detailed patient-level information particularly in relation to the actual costs of care.

Applicants must complete all sections listed below  
Sections which do not apply should be completed as 'Not Applicable'

## F. Study Type

### Hypothesis generating

This study will generate the hypothesis for HRU and costs between patients with (deep and superficial) and without infection after intramedullary nailing for tibial shaft fractures

## G. Study Design

This is a retrospective cohort study with a longitudinal follow-up for up to two years post intramedullary nailing for tibial shaft fractures.

## H. Feasibility counts

Based on the preliminary feasibility study of Hospital Episode Statistics (HES) inpatient data for research grade patients with complete data, we identified a total of 11,329 patients with intramedullary nailing for a tibial shaft fracture between 2011 and 2013 of which 509 patients had an infection following intramedullary nailing for a tibial shaft fracture.

## I. Sample size considerations

No prior real-world studies have been conducted to evaluate the health care resource use and costs of interest among patients with and without infection following intramedullary nailing for tibial shaft fracture. Therefore, it is not possible to estimate the sample size

## J. Data Linkage Required (if applicable):<sup>§</sup>

<sup>§</sup>Please note that the data linkage/s requested in research protocols will be published by the CPRD as part of its transparency policy

The Clinical Practice Research Datalink (CPRD) with HES is required to identify the patients and outcomes that are based on diagnosis and procedures recorded in the inpatient setting.

## K. Study population

Patients initially selected for tibial shaft fracture (ICD-10, S822) must meet all the following inclusion criteria:

1. Procedure for intramedullary nailing for tibial shaft fracture (appendix) between January 1, 2011 and February 30, 2016
  - Date of first intramedullary nailing for tibial shaft fracture between January 2011 and February 2016 will be the index date
2. Research grade patients with complete medical records for at least 12 months pre- and 30- day post index date. Patients with 90-day, 1- and 2- year follow-up or continuous enrollment will be further analysed.

### **Patients with the following criteria were excluded:**

1. Records for intramedullary nailing for tibial shaft fracture during the 12-month pre-index period
2. Records for treatment with internal fixation (appendix) during the 12-month pre-index period



**Applicants must complete all sections listed below**  
**Sections which do not apply should be completed as 'Not Applicable'**

3. Records for treatment with external fixation (appendix) from 12-month pre-index to 6 weeks pre-index. Records for external fixation during 6 weeks pre-index will be included as external fixation is often performed prior to intramedullary nailing.
4. Records for severe multiple injuries to different parts of the body (polytrauma) (appendix) in the 12-month pre-index period.
5. Records for a fracture in neoplastic disease (appendix) in the 12-month pre-index period.

**L. Selection of comparison group(s) or controls**

Patients not developing an infection anytime during the study period will be selected as the control group.

**M. Exposures, Health Outcomes<sup>§</sup> and Covariates**

*§Please note: Summary information on health outcomes (as included on the ISAC application form above) will be published on CPRD's website as part of its transparency policy*

Exposure

Patients developing infection during the 12-month post index period.

Outcome(s)

Primary Outcome

One- year inpatient costs

Secondary Outcomes

- Number of hospital readmissions (in 30-days, 90-days, 1 year and 2 years)
- Percent (yes/no) of patients with readmissions (in 30-days, 90-days, 1 year and 2 years)
- Total cost of care at the different time points (in 30-days, 90-days, 1 year and 2 years)
  - a. Inpatient admissions
  - b. Outpatient costs
  - c. Pharmacy

Costs will be expressed in UK pounds and adjusted for inflation to 2015 index. Healthcare costs will be obtained from the Personal Social Services Research Unit (PSSRU) 2015 Cost of Care public document and Healthcare Resource Group (HRG) codes available in HES. Drug costs will be obtained from British National Formulary 71 (March 2016-September 2016).

- Number of procedures for introduction of therapeutic substance (Appendix) (30-days, 90-days, 1 year and 2 years)
- Number of outpatient visits (all-cause) at the different time points (in 30-days, 90-days, 1 year and 2 years)
- Number of diagnostic tests and imaging (all-cause) at the different time points (in 30-days, 90-days, 1 year and 2 years)
- Number of days in ICU (all-cause) at the different time points (in 30-days, 90-days, 1 year and 2 years)
- Time of infection and type of infection (bacterial vs other )

Applicants must complete all sections listed below  
Sections which do not apply should be completed as 'Not Applicable'

- Percent (yes/no) of patients with use of antibiotics at the different time points (in 30-days, 90-days, 1 year and 2 years)
- Patients necessitated amputation (Appendix) at the different time points (in 30-days, 90-days, 1 year and 2 years)

#### Covariates

The covariates information will be captured during 12-month pre-index period and will include the following:

##### *Patient Demographics*

- Age
- Gender
- Smoking status

##### *Procedural Characteristics*

- Year of the index date

##### *Patient Clinical Characteristics*

#### Comorbidities (Appendix)

- Diabetes
- Dyspnea
- Ventilator requirement
- Chronic obstructive pulmonary disease (COPD)
- Congestive heart failure (CHF)
- Renal failure
- Hypertension

#### Indices

- Charlson comorbidity index (CCI) - The CCI is an aggregate measure of comorbidity created by using select diagnoses associated with chronic disease (e.g., heart disease, cancer). The CCI includes 17 medical conditions and weights these conditions from +1 to +6.

#### Medications

- Anti-hypertensive medications
- Opioids

#### **N. Data/ Statistical Analysis**

All study variables will be analyzed descriptively. Frequency counts and proportions will be provided for dichotomous and polychotomous variables. Means, medians, and standard deviations will be provided for continuous variables. Time to infection will be depicted graphically using Kaplan-Meier curve.

Unadjusted comparisons of patient demographics, comorbidities and medication use between groups (with and without infection) will be performed with 2-sample t-tests for continuous variables and  $\chi^2$  tests for categorical variables and Wilcoxon rank sum tests for cost variables.

**Applicants must complete all sections listed below  
Sections which do not apply should be completed as 'Not Applicable'**

A sub-analysis will be conducted in which patients will be stratified by an open fracture and a closed tibial shaft fracture (appendix) to determine the outcomes.

All analyses will be conducted using SAS for Windows. Statistical significance will be set a-priori at  $p < 0.05$  (two-sided).

In addition, a generalized Linear Model (GLM) will be utilized to get adjusted results after control for confounding. Details of this methods are mentioned in the section below:

**O. Plan for addressing confounding**

Multivariable models will be constructed to examine the impact of infection versus no infection and other patient characteristics for healthcare utilization and cost outcomes. A Generalized Linear Model (GLM) will be utilized and the appropriate error distribution and link function will be used based on the outcome variable of interest for utilization and costs.

Following standard procedures, for each model regression diagnostics will be performed to assess goodness of fit and violations of model assumptions. Appropriate modifications will be made as needed either through selection of alternative error distributions or link functions, or through transformations of either the independent or dependent variables. We will also examine the fitted and the observed data to uncover outliers, their effect on the analysis, and possible misspecification of the initial equation.

**P. Plans for addressing missing data**

Missing data will not be imputed for the analyses. Most variables (drugs, procedures, diagnosis) can have no missing values, as they are assumed not to have occurred unless a record is identified. To be included in the study, patients will need to have complete medical history for at least 12 months pre-index to 12 months post-index date.

**Q. Patient or user group involvement (if applicable)**

This is purely an observational study using CPRD with HES linkage data. This study does not involve requesting additional information from GPs. Also, the study does not require contacting patients to get any additional information.

**R. Plans for disseminating and communicating study results, including the presence or absence of any restrictions on the extent and timing of publication**

The study will be disseminated per the ICMJE guidelines. We plan on submitting the results to a peer-reviewed journal and presenting the results at scientific conferences.

**S. Limitations of the study design, data sources, and analytic methods**

**Applicants must complete all sections listed below**  
**Sections which do not apply should be completed as 'Not Applicable'**

- Potential bias in patient population: only patients with complete medical history for 12 months post index will be included, thus excluding very severe patients with less than 12 month life expectancy
- Coding errors and misclassifications
- Under-reported or missing diagnoses, based on patients' choice (not to seek care) or access challenges
- Identify pharmacy cost in terms of medication prescribed in the primary care setting only
- Cost evaluated using PSSRU, HRG and BNF codes as the costs are not directly available in the data

**T. References**

1. de Lissovoy G, Fraeman K, Hutchins V, et al. Surgical site infection: incidence and impact on hospital utilization and treatment costs. *American journal of infection control* 2009;**37**(5):387-97.
2. Jenks PJ, Laurent M, McQuarry S, et al. Clinical and economic burden of surgical site infection (SSI) and predicted financial consequences of elimination of SSI from an English hospital. *The Journal of hospital infection* 2014;**86**(1):24-33.
3. Pollard TC, Newman JE, Barlow NJ, et al. Deep wound infection after proximal femoral fracture: consequences and costs. *The Journal of hospital infection* 2006;**63**(2):133-9.
4. Schmidt A, Benard S, Cyr S. Hospital Cost of Staphylococcal Infection after Cardiothoracic or Orthopedic Operations in France: A Retrospective Database Analysis. *Surgical infections* 2015;**16**(4):428-35.
5. Thakore RV, Greenberg SE, Shi H, et al. Surgical site infection in orthopedic trauma: A case-control study evaluating risk factors and cost. *Journal of clinical orthopaedics and trauma* 2015;**6**(4):220-6.
6. Wijeratna MD, McRoberts J, Porteous MJ. Cost of infection after surgery for intracapsular fracture of the femoral neck. *Annals of the Royal College of Surgeons of England* 2015;**97**(4):283-6.
7. Metsemakers WJ, Handojo K, Reynders P, et al. Individual risk factors for deep infection and compromised fracture healing after intramedullary nailing of tibial shaft fractures: a single centre experience of 480 patients. *Injury* 2015;**46**(4):740-5.
8. Minhas SV, Ho BS, Switaj PJ, et al. A comparison of 30-day complications following plate fixation versus intramedullary nailing of closed extra-articular tibia fractures. *Injury* 2015;**46**(4):734-9.
9. Buckley RE, Colton C. Infection. *Secondary Infection* 2012.  
[https://www2.aofoundation.org/wps/portal/surgery?showPage=redfix&bone=Tibia&segment=Shaft&classification=42-Special%20considerations&treatment=&method=Special%20considerations&implanttype=Complications&approach=&redfix\\_url=1341319024234](https://www2.aofoundation.org/wps/portal/surgery?showPage=redfix&bone=Tibia&segment=Shaft&classification=42-Special%20considerations&treatment=&method=Special%20considerations&implanttype=Complications&approach=&redfix_url=1341319024234).
10. Hannigan GD, Pulos N, Grice EA, et al. Current Concepts and Ongoing Research in the Prevention and Treatment of Open Fracture Infections. *Advances in wound care* 2015;**4**(1):59-74.
11. Kanakaris NK, Tosounidis TH, Giannoudis PV. Surgical management of infected non-unions: An update. *Injury* 2015;**46 Suppl 5**:S25-32.
12. Mouzopoulos G, Kanakaris NK, Kontakis G, et al. Management of bone infections in adults: the surgeon's and microbiologist's perspectives. *Injury* 2011;**42 Suppl 5**:S18-23.
13. The cost of infection in severe open tibial fractures treated with a free flap. 34th Annual Meeting of the European Bone & Joint Infection Society; 2015; Lisbon, Portugal.
14. Kendall J, Jones S, McNally M. Income and costs of treating tibial osteomyelitis in the uk – a comparison of limb salvage versus amputation. 34th Annual Meeting of the European Bone & Joint Infection Society. Lisbon, Portugal, 2015.

**List of Appendices** (Submit all appendices as separate documents to this application)

**Applicants must complete all sections listed below**  
**Sections which do not apply should be completed as 'Not Applicable'**

- Appendix 1: OPCS-4 codes to identify intramedullary nailing for long bones
- Appendix 2 OPCS-4 codes to identify internal fixation
- Appendix 3 OPCS-4 codes to identify external fixation
- Appendix 4: ICD-10 codes to identify severe multiple injuries
- Appendix 5: Read codes to identify fracture due to neoplastic disease
- Appendix 6: ICD-10, OPCS and Read codes to identify infection
- Appendix 7: OPCS-4 codes to identify procedures for introduction of therapeutic substance
- Appendix 8: OPCS-4 codes to identify procedures amputation of tibia bone
- Appendix 9: Read codes to identify diabetes mellitus with and without complications
- Appendix 10: Read codes to identify dyspnoea
- Appendix 11: Read codes to identify ventilator requirement
- Appendix 12: Read codes to identify COPD
- Appendix 13: Read codes to identify heart failure
- Appendix 14: Read codes to identify renal failure
- Appendix 15: Read codes to identify hypertension
- Appendix 16: Read, ICD-10 and OPCS codes to identify open and closed tibial shaft fracture
- Appendix 17: Read codes to identify Charlson comorbidity index
- Appendix 18: OPCS codes to identify reoperations

1. OPCS-4 codes to identify intramedullary nailing for long bones

| OPCS-4 | Description                                                                       |
|--------|-----------------------------------------------------------------------------------|
| W192   | Primary open reduction of fracture of long bone and fixation using rigid nail NEC |
| W242   | Closed reduction of fracture of long bone and rigid internal fixation NEC         |

2. OPCS-4 codes to identify internal fixation

| OPCS-4 | Description                                                                            |
|--------|----------------------------------------------------------------------------------------|
| O172   | Remanipulation of fracture of long bone and rigid internal fixation NEC                |
| O173   | Remanipulation of fracture of long bone and flexible internal fixation HFQ             |
| O175   | Remanipulation of fragment of bone and fixation using screw                            |
| O178   | Other specified secondary closed reduction of fracture of bone and internal fixation   |
| O179   | Unspecified secondary closed reduction of fracture of bone and internal fixation       |
| W195   | Primary open reduction of fragment of bone and fixation using screw                    |
| W196   | Primary open reduction of fragment of bone and fixation using wire system              |
| W198   | Other specified primary open reduction of fracture of bone and intramedullary fixation |
| W199   | Unspecified primary open reduction of fracture of bone and intramedullary fixation     |

| OPCS-4 | Description                                                                                 |
|--------|---------------------------------------------------------------------------------------------|
| W201   | Primary open reduction of fracture of long bone and extramedullary fixation using plate NEC |
| W202   | Primary open reduction of fracture of long bone and extramedullary fixation using cerclage  |
| W203   | Primary open reduction of fracture of long bone and extramedullary fixation using suture    |
| W204   | Primary open reduction of fracture of long bone and complex extramedullary fixation NEC     |
| W208   | Other specified primary open reduction of fracture of bone and extramedullary fixation      |
| W209   | Unspecified primary open reduction of fracture of bone and extramedullary fixation          |
| W231   | Secondary open reduction of fracture of bone and intramedullary fixation HFQ                |
| W232   | Secondary open reduction of fracture of bone and extramedullary fixation HFQ                |
| W236   | Secondary open reduction of fracture of bone and internal fixation HFQ                      |
| W248   | Other specified closed reduction of fracture of bone and internal fixation                  |
| W249   | Unspecified closed reduction of fracture of bone and internal fixation                      |
| W281   | Application of internal fixation to bone NEC                                                |
| W282   | Adjustment to internal fixation of bone NEC                                                 |
| W283   | Removal of internal fixation from bone NEC                                                  |
| W288   | Other specified other internal fixation of bone                                             |
| W289   | Unspecified other internal fixation of bone                                                 |

### 3. OPCS-4 codes to identify external fixation

| OPCS-4 | Description                                                                       |
|--------|-----------------------------------------------------------------------------------|
| W222   | Primary open reduction of fracture of bone and external fixation HFQ              |
| W235   | Secondary open reduction of fracture of bone and external fixation HFQ            |
| W252   | Closed reduction of fracture of bone and fixation using functional bracing system |
| W253   | Remanipulation of fracture of bone and external fixation HFQ                      |
| W258   | Other specified closed reduction of fracture of bone and external fixation        |
| W259   | Unspecified closed reduction of fracture of bone and external fixation            |
| W301   | Application of external fixation to bone NEC                                      |
| W302   | Adjustment to external fixation of bone NEC                                       |
| W303   | Removal of external fixation from bone NEC                                        |
| W304   | Application of external ring fixation to bone NEC                                 |
| W308   | Other specified other external fixation of bone                                   |
| W309   | Unspecified other external fixation of bone                                       |

## 4. ICD-10 codes to identify severe multiple injuries

| ICD-10 codes | Description                                                  |
|--------------|--------------------------------------------------------------|
| S097         | Multiple injuries of head                                    |
| S197         | Multiple injuries of neck                                    |
| S277         | Multiple injuries of intrathoracic organs                    |
| S297         | Multiple injuries of thorax                                  |
| S397         | Other multiple injuries of abdomen, lower back and pelvis    |
| S497         | Multiple injuries of shoulder and upper arm                  |
| S597         | Multiple injuries of forearm                                 |
| S647         | Injury of multiple nerves at wrist and hand level            |
| S697         | Multiple injuries of wrist and hand                          |
| S797         | Multiple injuries of hip and thigh                           |
| S897         | Multiple injuries of lower leg                               |
| S997         | Multiple injuries of ankle and foot                          |
| T042         | Crushing injuries involving multiple region of upper limb(s) |
| T043         | Crushing injuries involving multiple region of lower limb(s) |
| T062         | Injuries of nerves involving multiple body regions           |
| T063         | Injuries of blood vessels involving multiple body regions    |
| T068         | Other specified injuries involving multiple body regions     |
| T07X         | Unspecified multiple injuries                                |

## 5. Read codes to identify fracture due to neoplastic disease

| Medcode | Read_code | Description                            |
|---------|-----------|----------------------------------------|
| 54834   | N331700   | Fracture of bone in neoplastic disease |

## 6. ICD-10, OPCS and Read codes to identify infection

| ICD-10 codes | Description                                                  | Deep/Superficial |
|--------------|--------------------------------------------------------------|------------------|
| A498         | Other bacterial infections of unspecified site               | Deep             |
| A499         | Bacterial infection, unspecified                             | Deep             |
| A544         | Gonococcal infection of musculoskeletal system               | Deep             |
| L088         | Other spec local infections of skin and subcutaneous tissue  | Superficial      |
| L089         | Local infection of skin and subcutaneous tissue, unspecified | Superficial      |
| T814         | Infection following a procedure, not elsewhere classified    | Deep             |

| Medcode | Read_code | Description                                                  | Deep/Superficial |
|---------|-----------|--------------------------------------------------------------|------------------|
| 3128    | M07z.00   | Local infection skin/subcut tissue NOS                       | Superficial      |
| 6956    | SK03.00   | Post-traumatic wound infection NEC                           | Deep             |
| 7155    | N302.11   | Bone infection                                               | Deep             |
| 51854   | SP25600   | Postoperative wound infection-deep                           | Deep             |
| 20342   | N30..00   | Osteomyelitis, periostitis, other infections affecting bone  | Deep             |
| 21073   | M07y.00   | Local infection of skin or subcutaneous tissue OS            | Superficial      |
| 25363   | SP06800   | Infection and inflamm reac due inter ortho device            | Deep             |
| 40293   | SP06.00   | Infection and inflammation due to internal prosthetic device | Deep             |
| 30381   | SP05612   | [X]Prosthetic infection                                      | Deep             |
| 33381   | A3Byz00   | Other specified bacterial infection NOS                      | Superficial      |
| 43058   | N30z.00   | Bone infection NOS                                           | Deep             |
| 39830   | N300.12   | Acute bone infection                                         | Deep             |
| 40293   | SP06.00   | Infection and inflammation due to internal prosthetic device | Deep             |
| 52122   | Myu0.00   | [X]Infections of the skin and subcutaneous tissue            | Superficial      |
| 69280   | N30z600   | Bone infection NOS, of the lower leg                         | Deep             |
| 69855   | N30y600   | Other infections involving bone, of the lower leg            | Deep             |
| 4207    | M03z000   | Cellulitis NOS                                               | Superficial      |

| OPCS-4 | Description                          | Deep/Superficial |
|--------|--------------------------------------|------------------|
| S571   | Debridement of skin NEC              | Superficial      |
| W332   | Debridement of open fracture of bone | Deep             |
| T963   | Debridement of soft tissue NEC       | Deep             |
| W336   | Debridement of bone NEC              | Deep             |

7. OPCS-4 codes to identify procedures for debridement or introduction of therapeutic substance

| OPCS-4 | Description                          |
|--------|--------------------------------------|
| S571   | Debridement of skin NEC              |
| W332   | Debridement of open fracture of bone |
| T963   | Debridement of soft tissue NEC       |



|      |                                                                 |
|------|-----------------------------------------------------------------|
| W336 | Debridement of bone NEC                                         |
| W283 | Removal of internal fixation from bone NEC                      |
| X292 | Continuous intravenous infusion of therapeutic substance NEC    |
| S523 | Insertion of therapeutic substance into subcutaneous tissue NEC |
| W351 | Introduction of therapeutic substance into bone                 |

8. OPCS-4 codes to identify procedures amputation of tibia bone

| OPCS-4 | Description                       |
|--------|-----------------------------------|
| X094   | Amputation of leg through knee    |
| X095   | Amputation of leg below knee      |
| X098   | Other specified amputation of leg |
| X099   | Unspecified amputation of leg     |

9. Read codes to identify diabetes mellitus with and without complications

| Medcodes | Read code | Description                                                  |
|----------|-----------|--------------------------------------------------------------|
| 231370   | 66AJ.11   | Unstable diabetes                                            |
| 297735   | C108600   | Insulin dependent diabetes mellitus with gangrene            |
| 288454   | C101100   | Diabetes mellitus, adult onset, with ketoacidosis            |
| 344495   | C10M.00   | Lipoatrophic diabetes mellitus                               |
| 224500   | C103000   | Diabetes mellitus, juvenile type, with ketoacidotic coma     |
| 233608   | C109500   | Non-insulin dependent diabetes mellitus with gangrene        |
| 251808   | C109900   | Non-insulin-dependent diabetes mellitus without complication |
| 331810   | C109412   | Type 2 diabetes mellitus with ulcer                          |
| 344028   | C10FG00   | Type 2 diabetes mellitus with arthropathy                    |
| 279344   | C109.11   | NIDDM - Non-insulin dependent diabetes mellitus              |
| 343531   | C109G11   | Type II diabetes mellitus with arthropathy                   |
| 279348   | C10z.00   | Diabetes mellitus with unspecified complication              |
| 342740   | C10EM11   | Type I diabetes mellitus with ketoacidosis                   |
| 279343   | C107200   | Diabetes mellitus, adult with gangrene                       |
| 210870   | 250 GA    | Gangrene diabetic                                            |
| 339961   | C10FJ00   | Insulin treated Type 2 diabetes mellitus                     |
| 308067   | C108911   | Type I diabetes mellitus maturity onset                      |
| 297727   | C102z00   | Diabetes mellitus NOS with hyperosmolar coma                 |
| 283820   | 250 HC    | Hypoglycaemic Coma Diabetic                                  |
| 303253   | 250 AK    | Maturity Onset Diabetes Mellitus Insulin                     |
| 243302   | G73y000   | Diabetic Peripheral Angiopathy                               |

| Medcodes | Read code | Description                                                 |
|----------|-----------|-------------------------------------------------------------|
| 306131   | 250 E     | Hypoglycaemia In Diabetes Mellitus                          |
| 249566   | 66AJ.00   | Diabetic - Poor Control                                     |
| 331925   | C109J12   | Insulin treated Type II diabetes mellitus                   |
| 309010   | C109F12   | Type 2 diabetes mellitus with peripheral angiopathy         |
| 242649   | C109300   | Non-insulin-dependent diabetes mellitus with multiple comps |
| 242646   | C108400   | Unstable insulin dependent diabetes mellitus                |
| 340367   | C10F900   | Type 2 diabetes mellitus without complication               |
| 206461   | C10y.00   | Diabetes mellitus with other specified manifestation        |
| 344412   | C10F.11   | Type II diabetes mellitus                                   |
| 341116   | C10FL00   | Type 2 diabetes mellitus with persistent proteinuria        |
| 306134   | 250 NT    | UNSTABLE DIABETIC                                           |
| 309704   | C109G00   | Non-insulin dependent diabetes mellitus with arthropathy    |
| 343565   | C109G12   | Type 2 diabetes mellitus with arthropathy                   |
| 249564   | 66A5.00   | Diabetic on insulin                                         |
| 308094   | C109511   | Type II diabetes mellitus with gangrene                     |
| 243795   | L180600   | Pre-existing diabetes mellitus, non-insulin-dependent       |
| 256384   | 250 PR    | Pruritus Diabetic                                           |
| 341003   | C10FN00   | Type 2 diabetes mellitus with ketoacidosis                  |
| 341356   | C10E400   | Unstable type 1 diabetes mellitus                           |
| 270277   | C10zy00   | Other specified diabetes mellitus with unspecified comps    |
| 341680   | C10D.00   | Diabetes mellitus autosomal dominant type 2                 |
| 288459   | C107z00   | Diabetes mellitus NOS with peripheral circulatory disorder  |
| 341002   | C10EN00   | Type 1 diabetes mellitus with ketoacidotic coma             |
| 303258   | 250 CT    | Diabetic Cataract                                           |
| 215438   | C101000   | Diabetes mellitus, juvenile type, with ketoacidosis         |
| 206451   | C100011   | Insulin dependent diabetes mellitus                         |
| 229069   | 250 JA    | Diabetic Acidosis                                           |
| 309863   | C108411   | Unstable type I diabetes mellitus                           |
| 303250   | 250 A     | Sugar Diabetes                                              |
| 206452   | C103.00   | Diabetes mellitus with ketoacidotic coma                    |
| 261004   | C107.11   | Diabetes mellitus with gangrene                             |
| 303263   | 250 JL    | Ketosis Diabetic                                            |
| 303256   | 250 AN    | Diabetes                                                    |
| 341598   | C10E500   | Type 1 diabetes mellitus with ulcer                         |

| Medcodes | Read code | Description                                                |
|----------|-----------|------------------------------------------------------------|
| 242650   | C109400   | Non-insulin dependent diabetes mellitus with ulcer         |
| 297739   | C10yy00   | Other specified diabetes mellitus with other spec comps    |
| 292948   | 250 AB    | Abscess Diabetic                                           |
| 307957   | C109711   | Type II diabetes mellitus - poor control                   |
| 261009   | C10A000   | Malnutrition-related diabetes mellitus with coma           |
| 339633   | C10F.00   | Type 2 diabetes mellitus                                   |
| 309658   | C109J11   | Insulin treated non-insulin dependent diabetes mellitus    |
| 223592   | 8A13.00   | Diabetic stabilisation                                     |
| 233607   | C108.00   | Insulin dependent diabetes mellitus                        |
| 347683   | C10EG00   | Type 1 diabetes mellitus with peripheral angiopathy        |
| 340865   | C108E12   | Type 1 diabetes mellitus with hypoglycaemic coma           |
| 302787   | C108.13   | Type I diabetes mellitus                                   |
| 270271   | C107100   | Diabetes mellitus, adult, peripheral circulatory disorder  |
| 233609   | C10A100   | Malnutrition-related diabetes mellitus with ketoacidosis   |
| 261001   | C102000   | Diabetes mellitus, juvenile type, with hyperosmolar coma   |
| 237987   | 250 AT    | Diabetic Amyotrophy                                        |
| 308119   | C109411   | Type II diabetes mellitus with ulcer                       |
| 341509   | C10F500   | Type 2 diabetes mellitus with gangrene                     |
| 303262   | 250 JK    | Ketoacidosis Diabetic                                      |
| 297726   | C102100   | Diabetes mellitus, adult onset, with hyperosmolar coma     |
| 308004   | C108E11   | Type I diabetes mellitus with hypoglycaemic coma           |
| 339527   | C109K00   | Hyperosmolar non-ketotic state in type 2 diabetes mellitus |
| 247153   | 250 G     | Ulcer Diabetic                                             |
| 258769   | 66AJz00   | Diabetic - poor control NOS                                |
| 347258   | C10FJ11   | Insulin treated Type II diabetes mellitus                  |
| 297734   | C108500   | Insulin dependent diabetes mellitus with ulcer             |
| 309300   | C109J00   | Insulin treated Type 2 diabetes mellitus                   |
| 341126   | C10E800   | Type 1 diabetes mellitus - poor control                    |
| 309125   | C108812   | Type 1 diabetes mellitus - poor control                    |
| 206454   | C107400   | NIDDM with peripheral circulatory disorder                 |
| 343055   | C10G.00   | Secondary pancreatic diabetes mellitus                     |
| 340580   | C10EM00   | Type 1 diabetes mellitus with ketoacidosis                 |
| 331540   | 66AV.00   | Diabetic on insulin and oral treatment                     |
| 298869   | L180500   | Pre-existing diabetes mellitus, insulin-dependent          |

| Medcodes | Read code | Description                                                 |
|----------|-----------|-------------------------------------------------------------|
| 342313   | C10FP00   | Type 2 diabetes mellitus with ketoacidotic coma             |
| 297725   | C100.00   | Diabetes mellitus with no mention of complication           |
| 344338   | C10E600   | Type 1 diabetes mellitus with gangrene                      |
| 333576   | C109D12   | Type 2 diabetes mellitus with hypoglycaemic coma            |
| 341127   | C10FF00   | Type 2 diabetes mellitus with peripheral angiopathy         |
| 261005   | C108.12   | Type 1 diabetes mellitus                                    |
| 206457   | C109.00   | Non-insulin-dependent diabetes mellitus                     |
| 331823   | C109D00   | Non-insulin dependent diabetes mellitus with hypoglyca coma |
| 242656   | C10zz00   | Diabetes mellitus NOS with unspecified complication         |
| 340814   | C10EE00   | Type 1 diabetes mellitus with hypoglycaemic coma            |
| 295382   | 66AS.00   | Diabetic annual review                                      |
| 233606   | C107000   | Diabetes mellitus, juvenile ??? circulatory disorder        |
| 347648   | C10E412   | Unstable insulin dependent diabetes mellitus                |
| 341139   | C10E900   | Type 1 diabetes mellitus maturity onset                     |
| 242642   | C101y00   | Other specified diabetes mellitus with ketoacidosis         |
| 344989   | C10FL11   | Type II diabetes mellitus with persistent proteinuria       |
| 247152   | 250 DR    | Diabetic Diarrhoea                                          |
| 283822   | 250 NH    | Hyperosmolar Diabetic State                                 |
| 303259   | 250 DC    | Dietary Control Diabetes                                    |
| 310005   | C109712   | Type 2 diabetes mellitus - poor control                     |
| 270372   | Cyu2.00   | [X]Diabetes mellitus                                        |
| 270268   | C10..00   | Diabetes mellitus                                           |
| 346131   | C10EA00   | Type 1 diabetes mellitus without complication               |
| 279341   | C100z00   | Diabetes mellitus NOS with no mention of complication       |
| 297729   | C103z00   | Diabetes mellitus NOS with ketoacidotic coma                |
| 331809   | C108G00   | Insulin dependent diab mell with peripheral angiopathy      |
| 308089   | C108E00   | Insulin dependent diabetes mellitus with hypoglycaemic coma |
| 215437   | C101.00   | Diabetes mellitus with ketoacidosis                         |
| 347882   | C10E812   | Insulin dependent diabetes mellitus - poor control          |
| 341302   | C10F700   | Type 2 diabetes mellitus - poor control                     |
| 222266   | 66AK.00   | Diabetic - cooperative patient                              |
| 270276   | C10B000   | Steroid induced diabetes mellitus without complication      |
| 233603   | C100111   | Maturity onset diabetes                                     |
| 339632   | C10E.00   | Type 1 diabetes mellitus                                    |

| Medcodes | Read code | Description                                                |
|----------|-----------|------------------------------------------------------------|
| 223655   | 8H2J.00   | Admit diabetic emergency                                   |
| 283823   | 2500AH    | Latent Diabetes                                            |
| 285267   | 1434      | H/O: diabetes mellitus                                     |
| 308820   | C108811   | Type I diabetes mellitus - poor control                    |
| 344076   | C10E.12   | Insulin dependent diabetes mellitus                        |
| 270269   | C100100   | Diabetes mellitus, adult onset, no mention of complication |
| 341357   | C10F400   | Type 2 diabetes mellitus with ulcer                        |
| 242655   | C10z100   | Diabetes mellitus, adult onset, unspecified complication   |
| 280482   | L180X00   | Pre-existing diabetes mellitus, unspecified                |
| 341557   | 8BL2.00   | Patient on maximal tolerated therapy for diabetes          |
| 242653   | C10yz00   | Diabetes mellitus NOS with other specified manifestation   |
| 288455   | C102.00   | Diabetes mellitus with hyperosmolar coma                   |
| 270275   | C10A.00   | Malnutrition-related diabetes mellitus                     |
| 270273   | C108.11   | IDDM-Insulin dependent diabetes mellitus                   |
| 215439   | C101z00   | Diabetes mellitus NOS with ketoacidosis                    |
| 342317   | C10FD00   | Type 2 diabetes mellitus with hypoglycaemic coma           |
| 261007   | C108800   | Insulin dependent diabetes mellitus - poor control         |
| 303261   | 250 HP    | Precoma Diabetic                                           |
| 341856   | C10EK00   | Type 1 diabetes mellitus with persistent proteinuria       |
| 303252   | 250 AD    | Diabetes Mellitus Insulin Dependant                        |
| 347025   | C10H.00   | Diabetes mellitus induced by non-steroid drugs             |
| 270270   | C107.00   | Diabetes mellitus with peripheral circulatory disorder     |
| 332066   | C10D.11   | Maturity onset diabetes in youth type 2                    |
| 224506   | C107300   | IDDM with peripheral circulatory disorder                  |
| 340332   | C109F11   | Type II diabetes mellitus with peripheral angiopathy       |
| 309143   | C109D11   | Type II diabetes mellitus with hypoglycaemic coma          |
| 341409   | C10EL00   | Type 1 diabetes mellitus with persistent microalbuminuria  |
| 242641   | C100112   | Non-insulin dependent diabetes mellitus                    |
| 340474   | C10FM00   | Type 2 diabetes mellitus with persistent microalbuminuria  |
| 261095   | Cyu2000   | [X]Other specified diabetes mellitus                       |
| 288460   | C109.12   | Type 2 diabetes mellitus                                   |
| 224501   | C103y00   | Other specified diabetes mellitus with coma                |
| 302788   | C109.13   | Type II diabetes mellitus                                  |
| 332948   | C108511   | Type I diabetes mellitus with ulcer                        |

| Medcodes | Read code | Description                                                  |
|----------|-----------|--------------------------------------------------------------|
| 347834   | C10EN11   | Type I diabetes mellitus with ketoacidotic coma              |
| 297738   | C109700   | Non-insulin dependent diabetes mellitus - poor control       |
| 283819   | 250 H     | Coma Diabetic                                                |
| 215444   | C10y100   | Diabetes mellitus, adult, other specified manifestation      |
| 346130   | C10E.11   | Type I diabetes mellitus                                     |
| 344745   | C10N.00   | Secondary diabetes mellitus                                  |
| 347629   | C10F711   | Type II diabetes mellitus - poor control                     |
| 277055   | 66A1.00   | Diabetic - good control                                      |
| 251805   | C100000   | Diabetes mellitus, juvenile type, no mention of complication |
| 206900   | F464000   | Diabetic cataract                                            |
| 309738   | C109212   | Type 2 diabetes mellitus with neurological complications     |
| 224502   | C104000   | Diabetes mellitus, juvenile type, with renal manifestation   |
| 345097   | C109111   | Type II diabetes mellitus with ophthalmic complications      |
| 341813   | 2BBP.00   | O/E - right eye background diabetic retinopathy              |
| 346841   | C108C11   | Type I diabetes mellitus with polyneuropathy                 |
| 308934   | C108H00   | Insulin dependent diabetes mellitus with arthropathy         |
| 215442   | C109C00   | Non-insulin dependent diabetes mellitus with nephropathy     |
| 261008   | C108B00   | Insulin dependent diabetes mellitus with mononeuropathy      |
| 297732   | C106100   | Diabetes mellitus, adult onset, neurological manifestation   |
| 206455   | C108000   | Insulin-dependent diabetes mellitus with renal complications |
| 309524   | C109H00   | Non-insulin dependent d m with neuropathic arthropathy       |
| 251806   | C108200   | Insulin-dependent diabetes mellitus with neurological comps  |
| 343081   | C10F100   | Type 2 diabetes mellitus with ophthalmic complications       |
| 341814   | 2BBQ.00   | O/E - left eye background diabetic retinopathy               |
| 309275   | C109011   | Type II diabetes mellitus with renal complications           |
| 252191   | F420200   | Preproliferative diabetic retinopathy                        |
| 288456   | C105000   | Diabetes mellitus, juvenile type, ophthalmic manifestation   |
| 347472   | C10FR00   | Type 2 diabetes mellitus with gastroparesis                  |
| 288461   | C109100   | Non-insulin-dependent diabetes mellitus with ophthalm comps  |
| 306132   | 250 F     | Neuropathy Diabetic                                          |
| 341286   | C10FE00   | Type 2 diabetes mellitus with diabetic cataract              |
| 308948   | C108712   | Type 1 diabetes mellitus with retinopathy                    |
| 242643   | C106.13   | Diabetes mellitus with polyneuropathy                        |
| 279760   | F420.00   | Diabetic retinopathy                                         |

| Medcodes | Read code | Description                                                  |
|----------|-----------|--------------------------------------------------------------|
| 308463   | C109612   | Type 2 diabetes mellitus with retinopathy                    |
| 270274   | C109B00   | Non-insulin dependent diabetes mellitus with polyneuropathy  |
| 309943   | F420600   | Non proliferative diabetic retinopathy                       |
| 288457   | C105y00   | Other specified diabetes mellitus with ophthalmic complicatn |
| 309614   | C109E11   | Type II diabetes mellitus with diabetic cataract             |
| 341801   | C10FB00   | Type 2 diabetes mellitus with polyneuropathy                 |
| 340973   | C10FA00   | Type 2 diabetes mellitus with mononeuropathy                 |
| 347417   | C10F611   | Type II diabetes mellitus with retinopathy                   |
| 343003   | C10E200   | Type 1 diabetes mellitus with neurological complications     |
| 342681   | C108B11   | Type I diabetes mellitus with mononeuropathy                 |
| 206459   | C109600   | Non-insulin-dependent diabetes mellitus with retinopathy     |
| 298103   | F381300   | Myasthenic syndrome due to diabetic amyotrophy               |
| 224505   | C106z00   | Diabetes mellitus NOS with neurological manifestation        |
| 224503   | C104y00   | Other specified diabetes mellitus with renal complications   |
| 342469   | 2BBV.00   | O/E - left eye proliferative diabetic retinopathy            |
| 332953   | C108711   | Type I diabetes mellitus with retinopathy                    |
| 279761   | F420400   | Diabetic maculopathy                                         |
| 201928   | 250 LG    | Diabetic Glomerulosclerosis                                  |
| 309628   | C109C12   | Type 2 diabetes mellitus with nephropathy                    |
| 224504   | C106.11   | Diabetic amyotrophy                                          |
| 207385   | K01x111   | Kimmelstiel - Wilson disease                                 |
| 206456   | C108D00   | Insulin dependent diabetes mellitus with nephropathy         |
| 341836   | C108212   | Type 1 diabetes mellitus with neurological complications     |
| 242645   | C108100   | Insulin-dependent diabetes mellitus with ophthalmic comps    |
| 288858   | F3y0.00   | Diabetic mononeuropathy                                      |
| 252174   | F372.12   | Diabetic neuropathy                                          |
| 234015   | F420300   | Advanced diabetic maculopathy                                |
| 347410   | C10F011   | Type II diabetes mellitus with renal complications           |
| 344952   | 2BBI.00   | O/E - left eye stable treated prolif diabetic retinopathy    |
| 339960   | C10FC00   | Type 2 diabetes mellitus with nephropathy                    |
| 343345   | C10EF00   | Type 1 diabetes mellitus with diabetic cataract              |
| 308504   | C109E12   | Type 2 diabetes mellitus with diabetic cataract              |
| 309757   | C108D11   | Type I diabetes mellitus with nephropathy                    |
| 308851   | C109B11   | Type II diabetes mellitus with polyneuropathy                |

| Medcodes | Read code | Description                                                 |
|----------|-----------|-------------------------------------------------------------|
| 341264   | C10F200   | Type 2 diabetes mellitus with neurological complications    |
| 346403   | C10EB00   | Type 1 diabetes mellitus with mononeuropathy                |
| 309007   | C109H12   | Type 2 diabetes mellitus with neuropathic arthropathy       |
| 333002   | F420800   | High risk non proliferative diabetic retinopathy            |
| 242647   | C108700   | Insulin dependent diabetes mellitus with retinopathy        |
| 341800   | C10EC00   | Type 1 diabetes mellitus with polyneuropathy                |
| 219965   | 250 M     | Charcot's Diabetic Arthropathy                              |
| 261411   | F374z00   | Polyneuropathy in disease NOS                               |
| 309758   | C109112   | Type 2 diabetes mellitus with ophthalmic complications      |
| 306133   | 250 N     | Diabetic Nephropathy                                        |
| 309796   | 2BBL.00   | O/E - diabetic maculopathy present both eyes                |
| 331538   | C109012   | Type 2 diabetes mellitus with renal complications           |
| 242648   | C109000   | Non-insulin-dependent diabetes mellitus with renal comps    |
| 206458   | C109200   | Non-insulin-dependent diabetes mellitus with neuro comps    |
| 341701   | F420700   | High risk proliferative diabetic retinopathy                |
| 215440   | C106.12   | Diabetes mellitus with neuropathy                           |
| 342045   | 2BBS.00   | O/E - left eye preproliferative diabetic retinopathy        |
| 340163   | C109E00   | Non-insulin depend diabetes mellitus with diabetic cataract |
| 340357   | C10F600   | Type 2 diabetes mellitus with retinopathy                   |
| 297737   | C108C00   | Insulin dependent diabetes mellitus with polyneuropathy     |
| 336008   | C108211   | Type I diabetes mellitus with neurological complications    |
| 340987   | C10E000   | Type 1 diabetes mellitus with renal complications           |
| 310061   | C109H11   | Type II diabetes mellitus with neuropathic arthropathy      |
| 297731   | C106.00   | Diabetes mellitus with neurological manifestation           |
| 308830   | C109611   | Type II diabetes mellitus with retinopathy                  |
| 233989   | F372.11   | Diabetic polyneuropathy                                     |
| 344951   | 2BBk.00   | O/E - right eye stable treated prolif diabetic retinopathy  |
| 243072   | F420z00   | Diabetic retinopathy NOS                                    |
| 288458   | C105z00   | Diabetes mellitus NOS with ophthalmic manifestation         |
| 233604   | C105100   | Diabetes mellitus, adult onset, ophthalmic manifestation    |
| 340333   | C10ED00   | Type 1 diabetes mellitus with nephropathy                   |
| 308871   | C108F11   | Type I diabetes mellitus with diabetic cataract             |
| 331568   | C108011   | Type I diabetes mellitus with renal complications           |
| 346291   | C10FC11   | Type II diabetes mellitus with nephropathy                  |



| Medcodes | Read code | Description                                                 |
|----------|-----------|-------------------------------------------------------------|
| 340162   | C108012   | Type 1 diabetes mellitus with renal complications           |
| 340507   | C109A11   | Type II diabetes mellitus with mononeuropathy               |
| 252180   | F381311   | Diabetic amyotrophy                                         |
| 308872   | C109C11   | Type II diabetes mellitus with nephropathy                  |
| 347405   | C10EQ00   | Type 1 diabetes mellitus with gastroparesis                 |
| 279345   | C109A00   | Non-insulin dependent diabetes mellitus with mononeuropathy |
| 308715   | C108F00   | Insulin dependent diabetes mellitus with diabetic cataract  |
| 206453   | C104.11   | Diabetic nephropathy                                        |
| 342033   | 2BBR.00   | O/E - right eye preproliferative diabetic retinopathy       |
| 333621   | C108J12   | Type 1 diabetes mellitus with neuropathic arthropathy       |
| 347771   | C10FB11   | Type II diabetes mellitus with polyneuropathy               |
| 297733   | C106y00   | Other specified diabetes mellitus with neurological comps   |
| 256383   | 250 LK    | Kimmelstiel- Wilson Disease/Syndrome                        |
| 340257   | C10FH00   | Type 2 diabetes mellitus with neuropathic arthropathy       |
| 341459   | C10F000   | Type 2 diabetes mellitus with renal complications           |
| 297730   | C105.00   | Diabetes mellitus with ophthalmic manifestation             |
| 261428   | F420100   | Proliferative diabetic retinopathy                          |
| 333249   | C109211   | Type II diabetes mellitus with neurological complications   |
| 261003   | C104z00   | Diabetes mellitus with nephropathy NOS                      |
| 341221   | C10E100   | Type 1 diabetes mellitus with ophthalmic complications      |

#### 10. Read codes to identify dyspnoea

| Medcode | Read_code | Description                   |
|---------|-----------|-------------------------------|
| 3092    | R060A00   | [D]Dyspnoea                   |
| 6434    | 1736.00   | Paroxysmal nocturnal dyspnoea |
| 7000    | 2322.00   | O/E - dyspnoea                |
| 18116   | 173D.00   | Nocturnal dyspnoea            |
| 53771   | 173C.11   | Dyspnoea on exertion          |

#### 11. Read codes to identify ventilator requirement

| Medcode | Read_code | Description         |
|---------|-----------|---------------------|
| 87337   | 7M36300   | Ventilatory support |

## 12. Read codes to identify COPD

| Medcode | Read code | Description                                                  |
|---------|-----------|--------------------------------------------------------------|
| 1001    | H3...00   | Chronic obstructive pulmonary disease                        |
| 9520    | 66YB.00   | Chronic obstructive pulmonary disease monitoring             |
| 9876    | H38..00   | Severe chronic obstructive pulmonary disease                 |
| 10802   | H37..00   | Moderate chronic obstructive pulmonary disease               |
| 10863   | H36..00   | Mild chronic obstructive pulmonary disease                   |
| 11287   | 66YM.00   | Chronic obstructive pulmonary disease annual review          |
| 18621   | 66YL.00   | Chronic obstructive pulmonary disease follow-up              |
| 37247   | H3z..11   | Chronic obstructive pulmonary disease NOS                    |
| 45770   | 66Yg.00   | Chronic obstructive pulmonary disease disturbs sleep         |
| 45771   | 66Yh.00   | Chronic obstructive pulmonary disease does not disturb sleep |
| 65733   | Hyu3100   | [X]Other specified chronic obstructive pulmonary disease     |
| 67040   | H3y..11   | Other specified chronic obstructive pulmonary disease        |
| 93568   | H39..00   | Very severe chronic obstructive pulmonary disease            |
| 102685  | 66YB000   | Chronic obstructive pulmonary disease 3 monthly review       |
| 103007  | 66YB100   | Chronic obstructive pulmonary disease 6 monthly review       |
| 103494  | 14B3.12   | History of chronic obstructive pulmonary disease             |
| 104985  | 9NgP.00   | On chronic obstructive pulmonary disease supprtv cre pathway |
| 105457  | 8CMW500   | Chronic obstructive pulmonary disease care pathway           |

## 13. Read codes to identify heart failure

| Medcode | Read_code | Description                                                 |
|---------|-----------|-------------------------------------------------------------|
| 398     | G580.00   | Congestive heart failure                                    |
| 2062    | G58..00   | Heart failure                                               |
| 4024    | G58z.00   | Heart failure NOS                                           |
| 9913    | 1O1..00   | Heart failure confirmed                                     |
| 10079   | G580.12   | Right heart failure                                         |
| 15058   | 14A6.00   | H/O: heart failure                                          |
| 17851   | 8HBE.00   | Heart failure follow-up                                     |
| 21837   | G232.00   | Hypertensive heart&renal dis wth (congestive) heart failure |
| 23707   | G580000   | Acute congestive heart failure                              |
| 27964   | G582.00   | Acute heart failure                                         |
| 28684   | G233.00   | Hypertensive heart and renal disease with renal failure     |
| 30779   | 662W.00   | Heart failure annual review                                 |
| 32671   | G580100   | Chronic congestive heart failure                            |

| Medcode | Read_code | Description                                                 |
|---------|-----------|-------------------------------------------------------------|
| 32898   | 8H2S.00   | Admit heart failure emergency                               |
| 32911   | 9Or..00   | Heart failure monitoring administration                     |
| 32945   | 8CL3.00   | Heart failure care plan discussed with patient              |
| 46912   | 14AM.00   | H/O: Heart failure in last year                             |
| 60099   | 67D4.00   | Heart failure information given to patient                  |
| 66306   | SP11111   | Heart failure as a complication of care                     |
| 69062   | 9N6T.00   | Referred by heart failure nurse specialist                  |
| 71235   | 8Hk0.00   | Referred to heart failure education group                   |
| 83502   | 662p.00   | Heart failure 6 month review                                |
| 94870   | G580400   | Congestive heart failure due to valvular disease            |
| 96799   | G5y4z00   | Post cardiac operation heart failure NOS                    |
| 101137  | G583.11   | HFNEF - heart failure with normal ejection fraction         |
| 101138  | G583.00   | Heart failure with normal ejection fraction                 |
| 103732  | 8CMK.00   | Has heart failure management plan                           |
| 105002  | 679W100   | Education about deteriorating heart failure                 |
| 105542  | 8CeC.00   | Preferred place of care for next exacerbation heart failure |
| 106198  | 661M500   | Heart failure self-management plan agreed                   |

#### 14. Read codes to identify renal failure

| Medcode | Read_code | Description                                             |
|---------|-----------|---------------------------------------------------------|
| 350     | K06..00   | Renal failure unspecified                               |
| 512     | K05..00   | Chronic renal failure                                   |
| 2266    | K04..00   | Acute renal failure                                     |
| 6712    | K050.00   | End stage renal failure                                 |
| 11554   | SP15400   | Renal failure as a complication of care                 |
| 11773   | 7L1A.11   | Dialysis for renal failure                              |
| 15945   | SK05.00   | Renal failure following crush syndrome                  |
| 16929   | D215.00   | Anaemia secondary to renal failure                      |
| 24292   | SP15412   | Post operative renal failure                            |
| 24676   | SK08.00   | Acute renal failure due to rhabdomyolysis               |
| 25394   | D215000   | Anaemia secondary to chronic renal failure              |
| 25582   | K04z.00   | Acute renal failure NOS                                 |
| 28684   | G233.00   | Hypertensive heart and renal disease with renal failure |
| 31549   | 7L1A.00   | Compensation for renal failure                          |
| 32423   | G222.00   | Hypertensive renal disease with renal failure           |

| Medcode | Read_code | Description                                                  |
|---------|-----------|--------------------------------------------------------------|
| 35235   | K04y.00   | Other acute renal failure                                    |
| 48022   | 7L1Ay00   | Other specified compensation for renal failure               |
| 53852   | K05..12   | End stage renal failure                                      |
| 53940   | Kyu2100   | [X]Other chronic renal failure                               |
| 53945   | Kyu2000   | [X]Other acute renal failure                                 |
| 56760   | 7L1B.00   | Placement ambulatory apparatus compensation renal failure    |
| 57919   | K043.00   | Acute drug-induced renal failure                             |
| 59194   | 7L1By00   | Placement ambulatory apparatus- compensate renal failure OS  |
| 61930   | Kyu2.00   | [X]Renal failure                                             |
| 63277   | L393.00   | Acute renal failure following labour and delivery            |
| 63760   | SK05.11   | Renal failure after crushing                                 |
| 64636   | 7L1Az00   | Compensation for renal failure NOS                           |
| 65089   | 7L1Cz00   | Placement other apparatus- compensate for renal failure NOS  |
| 71314   | L093.00   | Renal failure following abortive pregnancy                   |
| 72458   | L393000   | Post-delivery acute renal failure unspecified                |
| 83513   | 7L1C.00   | Placement other apparatus for compensation for renal failure |
| 96179   | L393100   | Post-delivery acute renal failure - delivered with p/n prob  |
| 97198   | K044.00   | Acute renal failure due to urinary obstruction               |
| 100205  | K0E..00   | Acute-on-chronic renal failure                               |
| 101666  | L070300   | Unspecified abortion with renal failure                      |
| 104857  | K043000   | Acute renal failure due to ACE inhibitor                     |
| 105209  | K045.00   | Acute renal failure due to non-traumatic rhabdomyolysis      |
| 105267  | K04B.00   | Acute renal failure due to traumatic rhabdomyolysis          |
| 105739  | K04..11   | ARF - Acute renal failure                                    |
| 106860  | C353600   | Renal failure-associated hyperphosphataemia                  |
| 107241  | K043400   | Acute renal failure induced by non-steroid anti-inflamm drug |

#### 15. Read codes to identify hypertension

| Medcode | Read_code | Description                   |
|---------|-----------|-------------------------------|
| 799     | G20..00   | Essential hypertension        |
| 1894    | G201.00   | Benign essential hypertension |
| 2666    | 14A2.00   | H/O: hypertension             |
| 3425    | 662O.00   | On treatment for hypertension |
| 3712    | G20z.11   | Hypertension NOS              |
| 4372    | G202.00   | Systolic hypertension         |

| Medcode | Read_code | Description                                                  |
|---------|-----------|--------------------------------------------------------------|
| 7329    | G24..00   | Secondary hypertension                                       |
| 10818   | G20z.00   | Essential hypertension NOS                                   |
| 12680   | 8CR4.00   | Hypertension clinical management plan                        |
| 15377   | G200.00   | Malignant essential hypertension                             |
| 16059   | G24z.00   | Secondary hypertension NOS                                   |
| 16565   | 6627      | Good hypertension control                                    |
| 18482   | 662c.00   | Hypertension six month review                                |
| 18590   | 662b.00   | Moderate hypertension control                                |
| 19070   | 662d.00   | Hypertension annual review                                   |
| 21826   | 662F.00   | Hypertension treatm. started                                 |
| 25371   | G241000   | Secondary benign renovascular hypertension                   |
| 27511   | 6628      | Poor hypertension control                                    |
| 30776   | 6629      | Hypertension:follow-up default                               |
| 31387   | G24z000   | Secondary renovascular hypertension NOS                      |
| 31755   | G240.00   | Secondary malignant hypertension                             |
| 34744   | G244.00   | Hypertension secondary to endocrine disorders                |
| 42229   | G24zz00   | Secondary hypertension NOS                                   |
| 44549   | L128.00   | Pre-exist hypertension compl preg childbirth and puerperium  |
| 51635   | G241z00   | Secondary benign hypertension NOS                            |
| 57288   | G241.00   | Secondary benign hypertension                                |
| 59383   | G240000   | Secondary malignant renovascular hypertension                |
| 73293   | G240z00   | Secondary malignant hypertension NOS                         |
| 83473   | G203.00   | Diastolic hypertension                                       |
| 85944   | 7Q01.00   | High cost hypertension drugs                                 |
| 97533   | Gyu2100   | [X]Hypertension secondary to other renal disorders           |
| 98230   | 67H8.00   | Lifestyle advice regarding hypertension                      |
| 101649  | 7Q01y00   | Other specified high cost hypertension drugs                 |
| 102406  | 662P000   | Hypertension 9 month review                                  |
| 102458  | Gyu2000   | [X]Other secondary hypertension                              |
| 105274  | G28..00   | Stage 2 hypertension (NICE - Nat Ins for Hth Clin Excl 2011) |
| 105316  | G25..11   | Stage 1 hypertension                                         |
| 105371  | G25..00   | Stage 1 hypertension (NICE - Nat Ins for Hth Clin Excl 2011) |
| 105480  | G27..00   | Hypertension resistant to drug therapy                       |
| 105487  | G26..11   | Severe hypertension                                          |

| Medcode | Read_code | Description                                                |
|---------|-----------|------------------------------------------------------------|
| 105989  | G26..00   | Severe hypertension (Nat Inst for Health Clinical Ex 2011) |
| 61166   | G21z000   | Hypertensive heart disease NOS without CCF                 |
| 61660   | G211000   | Benign hypertensive heart disease without CCF              |
| 95334   | G210000   | Malignant hypertensive heart disease without CCF           |

16. Codes to identify open and closed tibial shaft fracture

| Medcode | Read_code | Description                                              |
|---------|-----------|----------------------------------------------------------|
| 20678   | S333200   | Open fracture of tibia and fibula, shaft                 |
| 28068   | S333.00   | Open fracture of tibia/fibula, shaft                     |
| 28118   | S333000   | Open fracture shaft of tibia                             |
| 28198   | S333z00   | Open fracture of tibia and fibula, shaft, NOS            |
| 28233   | S33y.00   | Open fracture of tibia and fibula, unspecified part, NOS |
| 29084   | S33y200   | Open fracture of tibia and fibula, unspecified part      |
| 29164   | S33y000   | Open fracture of tibia, unspecified part, NOS            |

| Medcode | Read_code | Description                                                |
|---------|-----------|------------------------------------------------------------|
| 971     | S33x000   | Closed fracture of tibia, unspecified part, NOS            |
| 4572    | S33x200   | Closed fracture of tibia and fibula, unspecified part      |
| 29109   | S33x.00   | Closed fracture of tibia and fibula, unspecified part, NOS |
| 29121   | S332.00   | Closed fracture of tibia/fibula, shaft                     |
| 33520   | S332200   | Closed fracture of tibia and fibula, shaft                 |
| 34021   | S332000   | Closed fracture shaft of tibia                             |
| 41971   | S33xz00   | Closed fracture of tibia and fibula, unspecified part, NOS |
| 55464   | S332z00   | Closed fracture of tibia and fibula, shaft, NOS            |

| OPCS-4 | Description                          | Open/closed fracture |
|--------|--------------------------------------|----------------------|
| S571   | Debridement of skin NEC              | Open                 |
| W332   | Debridement of open fracture of bone | Open                 |
| T963   | Debridement of soft tissue NEC       | Open                 |
| W336   | Debridement of bone NEC              | Open                 |

| ICD-10 | Description                                             | Open/closed fracture |
|--------|---------------------------------------------------------|----------------------|
| T14.1  | Open wound of unspecified body region                   | Open                 |
| T01.3  | Open wounds involving multiple regions of lower limb(s) | Open                 |
| S81.7  | Multiple open wounds of lower leg                       | Open                 |

| ICD-10 | Description                                              | Open/closed fracture |
|--------|----------------------------------------------------------|----------------------|
| S81.8  | Open wound of other parts of lower leg                   | Open                 |
| S81.9  | Open wound of lower leg, part unspecified                | Open                 |
| T93.0  | Sequelae of open wound of lower limb                     | Open                 |
| T93.2  | Sequelae of other fractures of lower limb                | Open                 |
| T01.9  | Multiple open wounds, unspecified                        | Open                 |
| T13.1  | Open wound of lower limb, level unspecified              | Open                 |
| T01.8  | Open wounds involving other combinations of body regions | Open                 |
| T94.0  | Sequelae of injuries involving multiple body regions     | Open                 |
| T94.1  | Sequelae of injuries, not specified by body region       | Open                 |
| T12.1  | Fracture of lower limb, level unspecified, open          | Open                 |

17. Read codes to identify Charlson comorbidity index

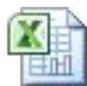

Microsoft Excel 2003  
Worksheet

18. OPCS Codes to identify reoperations

| OPCS-4 | Description                                                                          |
|--------|--------------------------------------------------------------------------------------|
| W242   | Closed reduction of fracture of long bone and rigid internal fixation NEC            |
| O172   | Remanipulation of fracture of long bone and rigid internal fixation NEC              |
| O173   | Remanipulation of fracture of long bone and flexible internal fixation HFQ           |
| O175   | Remanipulation of fragment of bone and fixation using screw                          |
| O178   | Other specified secondary closed reduction of fracture of bone and internal fixation |
| O179   | Unspecified secondary closed reduction of fracture of bone and internal fixation     |
| W231   | Secondary open reduction of fracture of bone and intramedullary fixation HFQ         |
| W232   | Secondary open reduction of fracture of bone and extramedullary fixation HFQ         |
| W236   | Secondary open reduction of fracture of bone and internal fixation HFQ               |
| W248   | Other specified closed reduction of fracture of bone and internal fixation           |
| W249   | Unspecified closed reduction of fracture of bone and internal fixation               |
| W281   | Application of internal fixation to bone NEC                                         |
| W282   | Adjustment to internal fixation of bone NEC                                          |
| W283   | Removal of internal fixation from bone NEC                                           |
| W288   | Other specified other internal fixation of bone                                      |
| W289   | Unspecified other internal fixation of bone                                          |

| OPCS-4 | Description                                                                       |
|--------|-----------------------------------------------------------------------------------|
| W235   | Secondary open reduction of fracture of bone and external fixation HFQ            |
| W252   | Closed reduction of fracture of bone and fixation using functional bracing system |
| W253   | Remanipulation of fracture of bone and external fixation HFQ                      |
| W258   | Other specified closed reduction of fracture of bone and external fixation        |
| W259   | Unspecified closed reduction of fracture of bone and external fixation            |
| W301   | Application of external fixation to bone NEC                                      |
| W302   | Adjustment to external fixation of bone NEC                                       |
| W303   | Removal of external fixation from bone NEC                                        |
| W304   | Application of external ring fixation to bone NEC                                 |
| W308   | Other specified other external fixation of bone                                   |
| W309   | Unspecified other external fixation of bone                                       |
| W35.3  | Removal of implanted substance from bone                                          |
| W32    | Other graft of bone                                                               |
| W32.1  | Prepared graft of bone                                                            |
| W32.2  | Allograft of bone NEC                                                             |
| W32.3  | Xenograft of bone                                                                 |
| W32.4  | Synthetic graft of bone                                                           |
| W32.5  | Cancellous chip allograft of bone                                                 |
| W32.8  | Other specified other graft of bone                                               |
| W32.9  | Unspecified other graft of bone                                                   |
| S31.3  | Revision of flap of skin NEC                                                      |



Additional file 2: Baseline and results at all time points

Table C1. Patient demographic and clinical characteristics at all time points

|                                                      | All enrolled patients (N=805) | Index stay           |                  |                      | 30 days              |                  |                      | 90 days              |                  |                      | 1 year               |                  |                      | 2 years              |                  |                      |
|------------------------------------------------------|-------------------------------|----------------------|------------------|----------------------|----------------------|------------------|----------------------|----------------------|------------------|----------------------|----------------------|------------------|----------------------|----------------------|------------------|----------------------|
|                                                      |                               | No infection (N=775) | Infection (N=30) | p-value <sup>a</sup> | No infection (N=736) | Infection (N=64) | p-value <sup>a</sup> | No infection (N=699) | Infection (N=71) | p-value <sup>a</sup> | No infection (N=606) | Infection (N=80) | p-value <sup>a</sup> | No infection (N=509) | Infection (N=79) | p-value <sup>a</sup> |
| <b>Demographics</b>                                  |                               |                      |                  |                      |                      |                  |                      |                      |                  |                      |                      |                  |                      |                      |                  |                      |
| Age (years), mean (SD)                               | 40.8 (17.2)                   | 40.7 (16.8)          | 43.0 (23.9)      | 0.61                 | 40.5 (16.9)          | 44.0 (19.1)      | 0.17                 | 40.7 (16.9)          | 43.8 (19.1)      | 0.20                 | 40.7 (16.8)          | 45.1 (19.1)      | 0.06                 | 40.5 (16.4)          | 46.4 (20.0)      | 0.02                 |
| Gender, n (%)                                        |                               |                      |                  | 0.84                 |                      |                  | 1.00                 |                      |                  | 1.00                 |                      |                  | 0.89                 |                      |                  | 1.00                 |
| Male                                                 | 590 (73.3)                    | 569 (73.4)           | 21 (70.0)        |                      | 539 (73.2)           | 47 (73.4)        |                      | 508 (72.7)           | 52 (73.2)        |                      | 438 (72.3)           | 59 (73.8)        |                      | 368 (72.3)           | 57 (72.2)        |                      |
| <b>Clinical history/comorbidities</b>                |                               |                      |                  |                      |                      |                  |                      |                      |                  |                      |                      |                  |                      |                      |                  |                      |
| Charlson score, mean (SD)                            | 0.04 (0.23)                   | 0.04 (0.24)          | 0.00 (0.00)      | <0.001               | 0.04 (0.24)          | 0.02 (0.12)      | 0.22                 | 0.04 (0.3)           | 0.01 (0.12)      | 0.13                 | 0.04 (0.24)          | 0.01 (0.11)      | 0.11                 | 0.03 (0.22)          | 0.01 (0.11)      | 0.25                 |
| Smoker, n (%)                                        | 256 (31.8)                    | 247 (31.9)           | 9 (30.0)         | 0.99                 | 239 (32.5)           | 17 (26.6)        | 0.41                 | 233 (33.3)           | 18 (25.4)        | 0.22                 | 202 (33.3)           | 20 (25.0)        | 0.17                 | 160 (31.4)           | 19 (24.1)        | 0.23                 |
| Diabetes, n (%)                                      | 27 (3.4)                      | 27 (3.5)             | 0 (0.0)          | 0.62                 | 26 (3.5)             | 1 (1.6)          | 0.72                 | 26 (3.7)             | 1 (1.4)          | 0.50                 | 21 (3.5)             | 3 (3.8)          | 0.75                 | 15 (3.0)             | 3 (3.8)          | 0.72                 |
| COPD, n (%)                                          | 8 (1.0)                       | 8 (1.0)              | 0 (0.0)          | 1.00                 | 8 (1.1)              | 0 (0.0)          | 1.00                 | 7 (1.0)              | 0 (0.0)          | 1.00                 | 6 (1.0)              | 1 (1.3)          | 0.58                 | 3 (0.6)              | 1 (1.3)          | 0.44                 |
| Congestive heart failure, n (%)                      | 2 (0.3)                       | 2 (0.3)              | 0 (0.0)          | 1.00                 | 2 (0.3)              | 0 (0.0)          | 1.00                 | 1 (0.1)              | 0 (0.0)          | 1.00                 | 0 (0.0)              | 0 (0.0)          | NA                   | 0 (0.0)              | 0 (0.0)          | NA                   |
| Hypertension, n (%)                                  | 12 (1.5)                      | 12 (1.6)             | 0 (0.0)          | 1.00                 | 12 (1.6)             | 0 (0.0)          | 0.61                 | 12 (1.7)             | 0 (0.0)          | 0.62                 | 10 (1.7)             | 0 (0.0)          | 0.62                 | 7 (1.4)              | 0 (0.0)          | 0.60                 |
| Compartment syndrome, n (%)                          | 27 (3.4)                      | 22 (2.8)             | 5 (16.7)         | 0.00                 | 19 (2.6)             | 8 (12.5)         | <0.05                | 18 (2.6)             | 8 (11.3)         | <0.05                | 17 (2.8)             | 9 (11.2)         | 0.00                 | 15 (3.0)             | 8 (10.1)         | <0.05                |
| <b>Index episode</b>                                 |                               |                      |                  |                      |                      |                  |                      |                      |                  |                      |                      |                  |                      |                      |                  |                      |
| Year of intramedullary nailing, mean (SD)            | 2009 (3.6)                    | 2009 (3.6)           | 2009 (3.6)       | 0.72                 | 2009 (3.6)           | 2009 (3.6)       | 0.99                 | 2009 (3.6)           | 2009 (3.6)       | 0.74                 | 2008 (3.4)           | 2008 (3.4)       | 0.99                 | 2008 (3.1)           | 2008 (3.1)       | 0.85                 |
| Inpatient waiting time (days) for surgery, mean (SD) | 1.4 (2.4)                     | 1.4 (2.4)            | 0.7 (2.4)        | 0.14                 | 1.4 (2.4)            | 0.7 (1.7)        | <0.05                | 1.4 (2.5)            | 0.8 (1.7)        | <0.05                | 1.4 (2.4)            | 0.6 (1.0)        | <0.001               | 1.4 (2.2)            | 0.6 (1.0)        | <0.001               |
| Fracture type, n (%)                                 |                               |                      |                  | <0.001               |                      |                  | <0.001               |                      |                  | <0.001               |                      |                  | <0.001               |                      |                  | <0.001               |
| Closed fracture                                      | 663 (82.4)                    | 648 (83.6)           | 15 (50.0)        |                      | 624 (84.8)           | 35 (54.7)        |                      | 595 (85.1)           | 42 (59.2)        |                      | 524 (86.5)           | 49 (61.3)        |                      | 438 (86.1)           | 52 (65.8)        |                      |

|                                                                                          | All enrolled patients (N=805) | Index stay           |                  |                      | 30 days              |                  |                      | 90 days              |                  |                      | 1 year               |                  |                      | 2 years              |                  |                      |
|------------------------------------------------------------------------------------------|-------------------------------|----------------------|------------------|----------------------|----------------------|------------------|----------------------|----------------------|------------------|----------------------|----------------------|------------------|----------------------|----------------------|------------------|----------------------|
|                                                                                          |                               | No infection (N=775) | Infection (N=30) | p-value <sup>a</sup> | No infection (N=736) | Infection (N=64) | p-value <sup>a</sup> | No infection (N=699) | Infection (N=71) | p-value <sup>a</sup> | No infection (N=606) | Infection (N=80) | p-value <sup>a</sup> | No infection (N=509) | Infection (N=79) | p-value <sup>a</sup> |
| Received ≥1 prescription for antibiotics in the 12 months prior to the index stay, n (%) | 60 (7.5)                      | 60 (7.7)             | 0 (0.0)          | 0.16                 | 57 (7.7)             | 3 (4.7)          | 0.47                 | 56 (8.0)             | 3 (4.2)          | 0.36                 | 47 (7.8)             | 4 (5.0)          | 0.51                 | 35 (6.9)             | 5 (6.3)          | 1.000                |
| Received ≥1 prescription for opioids in the 12 months prior to the index stay, n (%)     | 16 (2.0)                      | 15 (1.9)             | 1 (3.3)          | 0.46                 | 15 (2.0)             | 1 (1.6)          | 1.00                 | 15 (2.2)             | 1 (1.4)          | 1.00                 | 11 (1.8)             | 2 (2.5)          | 0.66                 | 8 (1.6)              | 2 (2.5)          | 0.63                 |

Abbreviations: COPD, chronic obstructive pulmonary disease; NA, not applicable; SD, standard deviation.

<sup>a</sup> No infection versus infection, t-tests were performed for comparison of continuous variables and chi-squared (or Fisher exact tests when n was <5) for comparison of categorical variables.

**Table D1. Comparative results at all time points**

| Time period                                                               | Endpoint               | Bivariate analysis, mean (SD) |                                | Multivariate analysis, mean (95% CI) |                      | Absolute difference (multivariate analysis) |
|---------------------------------------------------------------------------|------------------------|-------------------------------|--------------------------------|--------------------------------------|----------------------|---------------------------------------------|
|                                                                           |                        | Infection                     | No infection                   | Infection                            | No infection         |                                             |
| Index stay<br><br>( <i>N</i> infection = 30; <i>N</i> no infection = 775) | Total costs (£)        | 11,695 (6,553)                | 6,669 (3,133; <i>p</i> <0.001) | 10,384 (8,900, 12,116)               | 6,603 (6,411, 6,802) | 3,781 <i>p</i> <0.001                       |
|                                                                           | Inpatient costs (£)    | 11,695 (6,553)                | 6,669 (3,133; <i>p</i> <0.001) | 10,384 (8,900, 12,116)               | 6,603 (6,411, 6,802) | 3,781 <i>p</i> <0.001                       |
|                                                                           | LOS (days)             | 22.6 (20.0)                   | 9.7 (12.1; <i>p</i> <0.001)    | 17.6 (13.0, 23.7)                    | 8.5 (8.0, 9.0)       | 9.05 <i>p</i> <0.001                        |
|                                                                           | ICU LOS (days)         | 1.5 (8.2)                     | 0.1 (1.1; <i>p</i> =0.53)      | 0.1 (0.1, 0.2)                       | 0.0 (0.0, 0.01)      | 0.115 <i>p</i> <0.001                       |
|                                                                           | Reoperations (number)  | 0.3 (0.8)                     | 0.0 (0.1; <i>p</i> <0.001)     | 0.1 (0.0, 0.2)                       | 0.0 (0.0, 0.0)       | 0.070 <i>p</i> <0.001                       |
|                                                                           | Reoperations (rate, %) | 13.3                          | 1.3 ( <i>p</i> <0.001)         | 9.7 (3.1, 26.3)                      | 1.1 (0.5, 2.1)       | 8.6 <i>p</i> <0.001                         |

| Time period                                                                                  | Endpoint                                 | Bivariate analysis, mean (SD) |                        | Multivariate analysis, mean (95% CI) |                      | Absolute difference (multivariate analysis) |
|----------------------------------------------------------------------------------------------|------------------------------------------|-------------------------------|------------------------|--------------------------------------|----------------------|---------------------------------------------|
|                                                                                              |                                          | Infection                     | No infection           | Infection                            | No infection         |                                             |
| Index stay + 30 days post-discharge<br><br>( <i>N infection = 64; N no infection = 736</i> ) | Total costs (£)                          | 12,673 (7,345)                | 7,089 (3,588; p<0.001) | 11,257 (10,045, 12,615)              | 7,017 (6,792, 7,248) | 4,241 p<0.001                               |
|                                                                                              | Inpatient costs (£)                      | 12,367 (7,290)                | 6,829 (3,397; p<0.001) | 11,008 (9,818, 12,343)               | 6,768 (6,551, 6,993) | 4,240 p<0.001                               |
|                                                                                              | Hospital outpatient/ambulatory costs (£) | 215 (116)                     | 155 (94; p=0.4)        | 245 (145, 345)                       | 152 (125, 179)       | 93 p=0.07                                   |
|                                                                                              | Primary care costs (£)                   | 289 (555)                     | 254 (673, p=0.24)      | 243 (139, 426)                       | 205 (175, 241)       | 38 p=0.57                                   |
|                                                                                              | LOS (days)                               | 19.3 (19.2)                   | 10.1 (12.2; p<0.001)   | 15.0 (12.1, 18.6)                    | 8.9 (8.4, 9.5)       | 6.1 p<0.001                                 |
|                                                                                              | ICU LOS (days)                           | 0.7 (5.6)                     | 0.1 (1.1; p=0.4)       | 0.1 (0.0, 0.1)                       | 0.0 (0.0, 0.0)       | 0.0 p<0.001                                 |
|                                                                                              | Readmissions (number)                    | 0.6 (0.6)                     | 0.1 (0.3; p<0.001)     | 0.5 (0.4, 0.7)                       | 0.1 (0.1, 0.1)       | 0.4 p<0.001                                 |
|                                                                                              | Readmissions (rate, %)                   | 48.4                          | 7.6 (p<0.001)          | 44.1 (31.5, 57.5)                    | 7.1 (5.4, 9.2)       | 37.0 p<0.001                                |
|                                                                                              | Reoperations (number)                    | 0.2 (0.7)                     | 0.0 (0.1; p<0.001)     | 0.1 (0.1, 0.2)                       | 0.0 (0.0, 0.0)       | 0.1 p<0.001                                 |
|                                                                                              | Reoperations (rate, %)                   | 14.1                          | 1.6 (p<0.001)          | 11.5 (5.4, 22.9)                     | 1.3 (0.7, 2.5)       | 10.2 p<0.001                                |
|                                                                                              | Amputation (rate, %)                     | 3.1                           | 0.1 (p<0.01)           | Not feasible                         |                      |                                             |
| Hospital outpatient/ambulatory referrals (number)                                            | 1.6 (0.9)                                | 1.2 (0.5; p=0.28)             | 1.6 (1.1, 2.2)         | 1.21 (1.0, 1.4)                      | 0.45 p=0.13          |                                             |
| Index stay + 90 days post-discharge<br><br>( <i>N infection = 71; N no</i>                   | Total costs (£)                          | 13,621 (7,827)                | 7,527 (4,326; p<0.001) | 11,949 (10,634, 13,427)              | 7,423 (7,160, 7,696) | 4,526 p<0.001                               |
|                                                                                              | Inpatient costs (£)                      | 13,154 (7,673)                | 7,157 (4,111; p<0.001) | 11,532 (10,246, 12,979)              | 7,072 (6,818, 7,336) | 4,459 p<0.001                               |

| Time period                                                                               | Endpoint                                          | Bivariate analysis, mean (SD) |                        | Multivariate analysis, mean (95% CI) |                      | Absolute difference (multivariate analysis) |
|-------------------------------------------------------------------------------------------|---------------------------------------------------|-------------------------------|------------------------|--------------------------------------|----------------------|---------------------------------------------|
|                                                                                           |                                                   | Infection                     | No infection           | Infection                            | No infection         |                                             |
| <i>infection = 699</i>                                                                    | Hospital outpatient/ambulatory costs (£)          | 183 (87)                      | 171 (135; p=0.53)      | 194 (125, 264)                       | 170 (141, 198)       | 25 p=0.515                                  |
|                                                                                           | Primary care costs (£)                            | 436 (637)                     | 353 (737; p<0.05)      | 428 (290, 630)                       | 299 (264, 338)       | 129 p=0.084                                 |
|                                                                                           | LOS (days)                                        | 21.7 (21.5)                   | 11.1 (14.6 p<0.001)    | 16.4 (13.2, 20.4)                    | 9.6 (9.0, 10.3)      | 6.8 p<0.001                                 |
|                                                                                           | ICU LOS (days)                                    | 0.7 (5.3)                     | 0.1 (1.2; p=0.576)     | 0.0 (0.0, 0.1)                       | 0.0 (0.0, 0.0)       | 0.0 p<0.001                                 |
|                                                                                           | Readmissions (number)                             | 0.8 (0.8)                     | 0.2 (0.6; p<0.001)     | 0.7 (0.5, 0.9)                       | 0.2 (0.2, 0.2)       | 0.5 p<0.001                                 |
|                                                                                           | Readmissions (rate, %)                            | 57.7                          | 17.2 (p<0.001)         | 5.4 (41.5, 65.9)                     | 16.5 (13.9, 19.5)    | 37.4 p<0.001                                |
|                                                                                           | Reoperations (number)                             | 0.3 (0.7)                     | 0.1 (0.3; p<0.001)     | 0.2 (0.1, 0.3)                       | 0.1 (0.0, 0.1)       | 0.1 p=0.001                                 |
|                                                                                           | Reoperations (rate, %)                            | 18.3                          | 6.0 (p<0.001)          | 14.3 (7.7, 25.0)                     | 5.4 (3.9, 7.4)       | 9.0 p<0.05                                  |
|                                                                                           | Amputation (rate, %)                              | 2.8                           | 0.1 (p<0.05)           | Not feasible                         |                      |                                             |
|                                                                                           | Hospital outpatient/ambulatory referrals (number) | 1.2 (0.6)                     | 1.4 (0.9; p=0.92)      | 1.3 (0.9, 1.7)                       | 1.4 (1.2, 1.5)       | 0.0 p=0.835                                 |
| Index stay + 1 year post-discharge<br><br><i>(N infection = 80; N no infection = 606)</i> | Total costs (£)                                   | 16,800 (12,663)               | 8,435 (5,330; p<0.001) | 14,756 (13,123, 16,593)              | 8,279 (7,946, 8,626) | 6,478 p<0.001                               |
|                                                                                           | Inpatient costs (£)                               | 15,580 (11,872)               | 7,746 (5,060; p<0.001) | 13,672 (12,122, 15,420)              | 7,616 (7,301, 7,944) | 6,056 p<0.001                               |
|                                                                                           | Hospital outpatient/ambulatory costs (£)          | 250 (251)                     | 239 (218; p=0.77)      | 220 (151, 288)                       | 244 (211, 277)       | 25 p=0.516                                  |
|                                                                                           | Primary care costs (£)                            | 1,139 (1,657)                 | 630 (903; p<0.001)     | 1,017 (769, 1,344)                   | 551 (498, 609)       | 466 p<0.001                                 |

| Time period                                     | Endpoint                                          | Bivariate analysis, mean (SD) |                        | Multivariate analysis, mean (95% CI) |                      | Absolute difference (multivariate analysis) |
|-------------------------------------------------|---------------------------------------------------|-------------------------------|------------------------|--------------------------------------|----------------------|---------------------------------------------|
|                                                 |                                                   | Infection                     | No infection           | Infection                            | No infection         |                                             |
|                                                 | LOS (days)                                        | 28.5 (33.3)                   | 12.6 (21.3; p<0.001)   | 21.9 (17.3, 27.7)                    | 10.5 (9.7, 11.4)     | 11.4 p<0.001                                |
|                                                 | ICU LOS (days)                                    | 0.2 (1.5)                     | 0.1 (1.1; p=0.758)     | 0.0 (0.0, 0.0)                       | 0.0 (0.0, 0.0)       | 0.0 p=0.914                                 |
|                                                 | Readmissions (number)                             | 1.5 (1.5)                     | 0.5 (0.9; p<0.001)     | 1.5 (1.2, 1.8)                       | 0.5 (0.4, 0.6)       | 1.0 p<0.001                                 |
|                                                 | Readmissions (rate, %)                            | 75                            | 36 (p<0.001)           | 74.4 (63.4, 83.0)                    | 35.9 (32.1, 39.9)    | 38.5 p<0.001                                |
|                                                 | Reoperations (number)                             | 0.6 (1.0)                     | 0.2 (0.5; p<0.001)     | 0.6 (0.5, 0.8)                       | 0.2 (0.2, 0.3)       | 0.4 p<0.001                                 |
|                                                 | Reoperations (rate, %)                            | 37.5                          | 21.3 (p<0.01)          | 38.6 (28.3, 50.0)                    | 20.3 (17.2, 23.8)    | 18.2 p<0.001                                |
|                                                 | Amputation (rate, %)                              | 2.5                           | 0.2 (p<0.05)           | Not feasible                         |                      |                                             |
|                                                 | Hospital outpatient/ambulatory referrals (number) | 1.8 (1.6)                     | 1.8 (1.5; p=0.66)      | 1.7 (1.2, 2.1)                       | 1.8 (1.6, 2.1)       | 0.2 p=0.44                                  |
| Index stay + 2 years post-discharge             | Total costs (£)                                   | 18,779 (14,929)               | 9,611 (6,284; p<0.001) | 16,626 (14,664, 18,849)              | 9,439 (8,998, 9,901) | 7,187 p<0.001                               |
| <i>(N infection = 79; N no infection = 509)</i> | Inpatient costs (£)                               | 16,900 (13,720)               | 8,573 (5,729; p<0.001) | 14,898 (13,106, 16,935)              | 8,447 (8,044, 8,871) | 6,451 p<0.001                               |
|                                                 | Hospital outpatient/ambulatory costs (£)          | 282 (296)                     | 275 (265; p=0.893)     | 264 (189, 338)                       | 277 (243, 310)       | 13 p=0.747                                  |
|                                                 | Primary care costs (£)                            | 1,758 (2,437)                 | 929 (1,179; p<0.01)    | 1,487 (1,149, 1,924)                 | 821 (742, 907)       | 666 p<0.001                                 |
|                                                 | LOS (days)                                        | 31.5 (38.1)                   | 13.4 (22.6; p<0.001)   | 24.6 (19.6, 30.8)                    | 11.3 (10.4, 12.3)    | 13.3 p<0.001                                |
|                                                 | ICU LOS (days)                                    | 0.2 (1.5)                     | 0.1 (1.2; p=0.24)      | 0.0 (0.0, 0.0)                       | 0.0 (0.0, 0.0)       | 0.0 p=0.20                                  |

| Time period | Endpoint                                          | Bivariate analysis, mean (SD) |                    | Multivariate analysis, mean (95% CI) |                   | Absolute difference (multivariate analysis) |
|-------------|---------------------------------------------------|-------------------------------|--------------------|--------------------------------------|-------------------|---------------------------------------------|
|             |                                                   | Infection                     | No infection       | Infection                            | No infection      |                                             |
|             | Readmissions (number)                             | 2.1 (2.3)                     | 1.0 (1.5; p<0.001) | 2.2 (1.9, 2.6)                       | 0.9 (0.8, 1.0)    | 1.3 p<0.001                                 |
|             | Readmissions (rate, %)                            | 77.2                          | 51.1 (p<0.001)     | 77.6 (67.0, 85.6)                    | 51.4 (46.9, 56.8) | 26.3 p<0.001                                |
|             | Reoperations (number)                             | 0.8 (1.1)                     | 0.4 (0.7; p<0.01)  | 0.8 (0.6, 1.0)                       | 0.4 (0.3, 0.4)    | 0.4 p<0.001                                 |
|             | Reoperations (rate, %)                            | 46.8                          | 32.4 (p<0.05)      | 49.0 (37.7, 60.3)                    | 31.2 (27.2, 35.5) | 17.7 p<0.05                                 |
|             | Amputation (rate, %)                              | 3.8                           | 0.2 (p<0.01)       | Not feasible                         |                   |                                             |
|             | Hospital outpatient/ambulatory referrals (number) | 2.0 (2.0)                     | 2.1 (1.9; p=0.55)  | 2.0 (1.5, 2.5)                       | 2.1 (1.8, 2.3)    | 0.1 p=0.82                                  |

Abbreviations: CI, confidence interval; ICU, intensive care unit; LOS, length of stay; NA, not applicable; SD, standard deviation.

**Table D2. 1 year cost breakdown (£) – inpatient setting**

| Endpoint               | Bivariate analysis, mean (SD) |               |
|------------------------|-------------------------------|---------------|
|                        | Infection                     | No infection  |
| Total inpatient costs  | 15,580 (11,872)               | 7,746 (5,060) |
| HRG costs              | 15,488 (11,743)               | 7,702 (4,985) |
| Unbundled HRG costs    | 36 (116)                      | 16 (72)       |
| Critical care costs    | 56 (381)                      | 26 (208)      |
| Specialised care costs | 0 (0)                         | 2 (42)        |

Abbreviations: HRG, Healthcare Resource Group; SD, standard deviation.

**Table D3. 1 year healthcare resource use and cost breakdown – primary care**

| Endpoint                         | Bivariate analysis, mean (SD) |              |
|----------------------------------|-------------------------------|--------------|
|                                  | Infection                     | No infection |
| Costs (£)                        |                               |              |
| Total primary care costs         | 1,139 (1,657)                 | 630 (903)    |
| Total drug costs                 | 368 (1,031)                   | 198 (681)    |
| Total test costs                 | 147 (247)                     | 95 (186)     |
| Imaging test costs               | 27 (71)                       | 25 (72)      |
| Total consultation costs         | 625 (721)                     | 338 (334)    |
| GP                               | 322 (317)                     | 212 (225)    |
| Nurse                            | 140 (362)                     | 36 (75)      |
| Other healthcare professional    | 120 (243)                     | 55 (121)     |
| Administrative                   | 42 (36)                       | 35 (30)      |
| Healthcare resource use (number) |                               |              |
| Total tests                      | 25 (52)                       | 14 (30)      |
| Imaging tests                    | 0.4 (0.8)                     | 0.5 (1.5)    |
| Total consultations              | 52 (51)                       | 33 (25)      |
| GP                               | 14 (13)                       | 9 (9)        |
| Nurse                            | 10 (21)                       | 3 (5)        |
| Other healthcare professional    | 9 (17)                        | 4 (8)        |
| Administrative                   | 22 (18)                       | 18 (15)      |

Abbreviations: GP, General Practitioner; SD, standard deviation.



**Table D4. Subgroup analyses of 1 year inpatient costs – infection type (deep versus superficial)**

|                                                   | <b>No infection<br/>(N=606)</b> | <b>Superficial infection<br/>(N=54)</b> | <b>Deep infection<br/>(N=26)</b> |
|---------------------------------------------------|---------------------------------|-----------------------------------------|----------------------------------|
| Bivariate analysis, mean (SD)                     | £7,746 (£5,060)                 | £14,232 (£8,633)                        | £18,378 (£16,592)                |
| Multivariate analysis, mean (95% CI) <sup>a</sup> | £7,614 (£7,301, £7,941)         | £12,814 (£11,093, £14,803)              | £15,513 (£12,640, £19,040)       |

Abbreviations: CI, confidence interval; COPD, chronic obstructive pulmonary disease; SD, standard deviation.

<sup>a</sup> Adjusted for open/closed fracture, age, smoker, year at index, diabetes, COPD, days prior nailing and compartment syndrome.

**Table D5. Subgroup analyses of 1 year inpatient costs – fracture type (open versus closed)**

| <b>Fracture type</b>                              | <b>No infection<br/>(N=606)</b> |                          | <b>Infection<br/>(N=80)</b> |                            |
|---------------------------------------------------|---------------------------------|--------------------------|-----------------------------|----------------------------|
|                                                   | <b>Closed<br/>(N=524)</b>       | <b>Open<br/>(N=82)</b>   | <b>Closed<br/>(N=49)</b>    | <b>Open<br/>(N=31)</b>     |
| Bivariate analysis, mean (SD)                     | £7,433 (£3,957)                 | £9,741 (£9,247)          | £12,291 (£7,366)            | £20,778 (£15,451)          |
| Multivariate analysis, mean (95% CI) <sup>a</sup> | £7,278 (£6,956, £7,614)         | £9,495 (£8,469, £10,645) | £12,178 (£10,492, £14,136)  | £19,542 (£16,166, £23,623) |

Abbreviations: CI, confidence interval; COPD, chronic obstructive pulmonary disease; SD, standard deviation.

<sup>a</sup> Adjusted for age, smoker, year at index, diabetes, COPD, days prior nailing and compartment syndrome.

Table D6. Sensitivity analyses

| Time period                                                                                        | Endpoint              | Bivariate analysis, mean (SD) |                             | Multivariate analysis, mean (95% CI) |                      | Absolute difference (multivariate analysis) |
|----------------------------------------------------------------------------------------------------|-----------------------|-------------------------------|-----------------------------|--------------------------------------|----------------------|---------------------------------------------|
|                                                                                                    |                       | Infection                     | No infection                | Infection                            | No infection         |                                             |
| Index stay<br><br>( <i>N</i> infection = 24; <i>N</i> no infection = 564)                          | Total costs (£)       | 12,554 (6,832)                | 6,580 (3,123; $p < 0.001$ ) | 11,110 (9,328, 13,232)               | 6,517 (6,295, 6,747) | 4,593 $p < 0.001$                           |
|                                                                                                    | LOS (days)            | 24.2 (20.9)                   | 9.4 (11.7; $p < 0.001$ )    | 18.6 (13.1, 26.4)                    | 8.5 (7.9, 9.1)       | 10.1 $p < 0.001$                            |
|                                                                                                    | Reoperations (number) | 0.3 (0.9)                     | 0.0 (0.1; $p < 0.001$ )     | 0.1 (0.0, 0.3)                       | 0.0 (0.0, 0.0)       | 0.1 $p < 0.001$                             |
|                                                                                                    | Reoperations (rate)   | 12.5                          | 1.6 ( $p < 0.01$ )          | 9.9 (2.7, 30.6)                      | 1.4 (0.7, 2.8)       | 8.5 $p < 0.05$                              |
| Index stay + 30 days post-discharge<br><br>( <i>N</i> infection = 51; <i>N</i> no infection = 537) | Total costs (£)       | 12,957 (7,385)                | 7,077 (3,747; $p < 0.001$ ) | 11,453 (10,016, 13,096)              | 7,010 (6,739, 7,292) | 4,444 $p < 0.001$                           |
|                                                                                                    | LOS (days)            | 20.2 (19.4)                   | 10.0 (12.4; $p < 0.001$ )   | 15.6 (12.1, 20.0)                    | 9.1 (8.4, 9.8)       | 6.5 $p < 0.001$                             |
|                                                                                                    | Readmissions (number) | 0.6 (0.6)                     | 0.1 (0.3; $p < 0.001$ )     | 0.5 (0.3, 0.7)                       | 0.1 (0.1, 0.1)       | 0.4 $p < 0.001$                             |
|                                                                                                    | Readmissions (rate)   | 47.1                          | 8.4 ( $p < 0.001$ )         | 45.7 (32.0, 60.0)                    | 7.9 (5.9, 10.5)      | 37.8 $p < 0.001$                            |
|                                                                                                    | Reoperations (number) | 0.3 (0.7)                     | 0.0 (0.2; $p < 0.001$ )     | 0.1 (0.1, 0.3)                       | 0.0 (0.0, 0.0)       | 0.1 $p < 0.001$                             |
|                                                                                                    | Reoperations (rate)   | 13.7                          | 2.2 ( $p < 0.001$ )         | 11.7 (5.0, 25.3)                     | 1.8 (1.0, 3.4)       | 9.9 $p < 0.001$                             |
| Index stay + 90 days post-discharge<br><br>( <i>N</i> infection = 59; <i>N</i> no infection = 529) | Total costs (£)       | 13,620 (7,762)                | 7,584 (4,622; $p < 0.001$ ) | 11,869 (10,364, 13,593)              | 7,480 (7,160, 7,813) | 4,389 $p < 0.001$                           |
|                                                                                                    | LOS (days)            | 21.9 (21.8)                   | 11.2 (15.2; $p < 0.001$ )   | 16.3 (12.7, 21.0)                    | 9.8 (9.1, 10.7)      | 6.5 $p < 0.001$                             |
|                                                                                                    | Readmissions (number) | 0.8 (0.8)                     | 0.2 (0.5; $p < 0.001$ )     | 0.7 (0.5, 0.9)                       | 0.2 (0.2, 0.2)       | 0.5 $p < 0.001$                             |

| Time period                                                                                        | Endpoint              | Bivariate analysis, mean (SD) |                        | Multivariate analysis, mean (95% CI) |                       | Absolute difference (multivariate analysis) |
|----------------------------------------------------------------------------------------------------|-----------------------|-------------------------------|------------------------|--------------------------------------|-----------------------|---------------------------------------------|
|                                                                                                    |                       | Infection                     | No infection           | Infection                            | No infection          |                                             |
|                                                                                                    | Readmissions (rate)   | 57.6                          | 18.1 (p<0.001)         | 54.9 (41.1, 68.0)                    | 17.2 (14.1, 20.8)     | 37.7 p<0.001                                |
|                                                                                                    | Reoperations (number) | 0.3 (0.7)                     | 0.1 (0.3; p<0.05)      | 0.2 (0.1, 0.3)                       | 0.1 (0.0, 0.1)        | 0.1 p<0.05                                  |
|                                                                                                    | Reoperations (rate)   | 15.3                          | 7.0 (p<0.05)           | 11.1 (5.2, 22.0)                     | 6.1 (4.3, 8.7)        | 5.0 p=0.1438                                |
| Index stay + 1 year post-discharge<br><br>( <i>N</i> infection = 72; <i>N</i> no infection = 516)  | Total costs (£)       | 16,788 (12,914)               | 8,449 (5,525; p<0.001) | 14,597 (12,841, 16,593)              | 8,294 (7,920, 8,686)  | 6,303 p<0.001                               |
|                                                                                                    | LOS (days)            | 29.2 (34.6)                   | 12.3 (21.1; p<0.001)   | 22.5 (17.7, 28.5)                    | 10.3 (9.4, 11.2)      | 12.2 p<0.001                                |
|                                                                                                    | Readmissions (number) | 1.5 (1.6)                     | 0.5 (0.9; p<0.001)     | 1.5 (1.2, 1.8)                       | 0.5 (0.4, 0.6)        | 1.0 p<0.001                                 |
|                                                                                                    | Readmissions (rate)   | 75.0                          | 35.5 (p<0.001)         | 75.0 (63.6, 83.8)                    | 35.3 (31.2, 39.6)     | 39.7 p<0.001                                |
|                                                                                                    | Reoperations (number) | 0.6 (0.9)                     | 0.2 (0.5; p<0.01)      | 0.5 (0.4, 0.7)                       | 0.2 (0.2, 0.3)        | 0.3 p<0.001                                 |
|                                                                                                    | Reoperations (rate)   | 36.1                          | 21.7 (p<0.05)          | 37.4 (26.7, 49.5)                    | 20.7 (17.3, 24.5)     | 16.8 p<0.05                                 |
| Index stay + 2 years post-discharge<br><br>( <i>N</i> infection = 79; <i>N</i> no infection = 509) | Total costs (£)       | 18,779 (14,929)               | 9,611 (6,284; p<0.001) | 16,626 (14,664, 18,849)              | 9,439 (8,998, 9,901), | 7,187 p<0.001                               |
|                                                                                                    | LOS (days)            | 31.5 (38.1)                   | 13.4 (22.6; p<0.001)   | 24.6 (19.6, 30.8)                    | 11.3 (10.4, 12.3)     | 13.3 p<0.001                                |
|                                                                                                    | Readmissions (number) | 2.1 (2.3)                     | 1.0 (1.5; p<0.001)     | 2.2 (1.9, 2.5)                       | 0.9 (0.8, 1.0)        | 1.3 p<0.001                                 |
|                                                                                                    | Readmissions (rate)   | 77.2                          | 51.1 (p<0.001)         | 77.6 (67.0, 85.6)                    | 51.4 (46.9, 55.8)     | 26.3 p<0.001                                |
|                                                                                                    | Reoperations (number) | 0.8 (1.1)                     | 0.4 (0.7; p<0.01)      | 0.8 (0.6, 1.0)                       | 0.4 (0.3, 0.5)        | 0.4 p<0.001                                 |

| Time period | Endpoint            | Bivariate analysis, mean (SD) |               | Multivariate analysis, mean (95% CI) |                   | Absolute difference (multivariate analysis) |
|-------------|---------------------|-------------------------------|---------------|--------------------------------------|-------------------|---------------------------------------------|
|             |                     | Infection                     | No infection  | Infection                            | No infection      |                                             |
|             | Reoperations (rate) | 46.8                          | 32.4 (p<0.05) | 49.0 (37.7, 60.3)                    | 31.2 (27.2, 35.5) | 17.7 p<0.05                                 |

Abbreviations: CI, confidence interval; LOS, length of stay; NA, not applicable; SD, standard deviation.

For peer review only

**STROBE 2007 (v4) Statement—Checklist of items that should be included in reports of *cohort studies***

| Section/Topic                | Item # | Recommendation                                                                                                                                                                       | Reported on page # |
|------------------------------|--------|--------------------------------------------------------------------------------------------------------------------------------------------------------------------------------------|--------------------|
| <b>Title and abstract</b>    | 1      | (a) Indicate the study's design with a commonly used term in the title or the abstract                                                                                               | 3                  |
|                              |        | (b) Provide in the abstract an informative and balanced summary of what was done and what was found                                                                                  | 3                  |
| <b>Introduction</b>          |        |                                                                                                                                                                                      |                    |
| Background/rationale         | 2      | Explain the scientific background and rationale for the investigation being reported                                                                                                 | 5-6                |
| Objectives                   | 3      | State specific objectives, including any prespecified hypotheses                                                                                                                     | 6                  |
| <b>Methods</b>               |        |                                                                                                                                                                                      |                    |
| Study design                 | 4      | Present key elements of study design early in the paper                                                                                                                              | 6                  |
| Setting                      | 5      | Describe the setting, locations, and relevant dates, including periods of recruitment, exposure, follow-up, and data collection                                                      | 6-7                |
| Participants                 | 6      | (a) Give the eligibility criteria, and the sources and methods of selection of participants. Describe methods of follow-up                                                           | 7                  |
|                              |        | (b) For matched studies, give matching criteria and number of exposed and unexposed                                                                                                  | NA                 |
| Variables                    | 7      | Clearly define all outcomes, exposures, predictors, potential confounders, and effect modifiers. Give diagnostic criteria, if applicable                                             | 7-8                |
| Data sources/<br>measurement | 8*     | For each variable of interest, give sources of data and details of methods of assessment (measurement). Describe comparability of assessment methods if there is more than one group | 7:9                |
| Bias                         | 9      | Describe any efforts to address potential sources of bias                                                                                                                            | 9-10               |
| Study size                   | 10     | Explain how the study size was arrived at                                                                                                                                            | 7                  |
| Quantitative variables       | 11     | Explain how quantitative variables were handled in the analyses. If applicable, describe which groupings were chosen and why                                                         | 9-10               |
| Statistical methods          | 12     | (a) Describe all statistical methods, including those used to control for confounding                                                                                                | 9-10               |
|                              |        | (b) Describe any methods used to examine subgroups and interactions                                                                                                                  | 9-10               |
|                              |        | (c) Explain how missing data were addressed                                                                                                                                          | 9                  |
|                              |        | (d) If applicable, explain how loss to follow-up was addressed                                                                                                                       | 10                 |
|                              |        | (e) Describe any sensitivity analyses                                                                                                                                                | 9-10               |
| <b>Results</b>               |        |                                                                                                                                                                                      |                    |

|                          |     |                                                                                                                                                                                                              |       |
|--------------------------|-----|--------------------------------------------------------------------------------------------------------------------------------------------------------------------------------------------------------------|-------|
| Participants             | 13* | (a) Report numbers of individuals at each stage of study—eg numbers potentially eligible, examined for eligibility, confirmed eligible, included in the study, completing follow-up, and analysed            | 10:14 |
|                          |     | (b) Give reasons for non-participation at each stage                                                                                                                                                         | 9     |
|                          |     | (c) Consider use of a flow diagram                                                                                                                                                                           | 10    |
| Descriptive data         | 14* | (a) Give characteristics of study participants (eg demographic, clinical, social) and information on exposures and potential confounders                                                                     | 10-11 |
|                          |     | (b) Indicate number of participants with missing data for each variable of interest                                                                                                                          | 10:14 |
|                          |     | (c) Summarise follow-up time (eg, average and total amount)                                                                                                                                                  | 10    |
| Outcome data             | 15* | Report numbers of outcome events or summary measures over time                                                                                                                                               | 10:14 |
| Main results             | 16  | (a) Give unadjusted estimates and, if applicable, confounder-adjusted estimates and their precision (eg, 95% confidence interval). Make clear which confounders were adjusted for and why they were included | 11:14 |
|                          |     | (b) Report category boundaries when continuous variables were categorized                                                                                                                                    | 10:14 |
|                          |     | (c) If relevant, consider translating estimates of relative risk into absolute risk for a meaningful time period                                                                                             | NA    |
| Other analyses           | 17  | Report other analyses done—eg analyses of subgroups and interactions, and sensitivity analyses                                                                                                               | 14-15 |
| <b>Discussion</b>        |     |                                                                                                                                                                                                              |       |
| Key results              | 18  | Summarise key results with reference to study objectives                                                                                                                                                     | 15    |
| <b>Limitations</b>       |     |                                                                                                                                                                                                              |       |
| Interpretation           | 20  | Give a cautious overall interpretation of results considering objectives, limitations, multiplicity of analyses, results from similar studies, and other relevant evidence                                   | 16    |
| Generalisability         | 21  | Discuss the generalisability (external validity) of the study results                                                                                                                                        | 15-16 |
| <b>Other information</b> |     |                                                                                                                                                                                                              |       |
| Funding                  | 22  | Give the source of funding and the role of the funders for the present study and, if applicable, for the original study on which the present article is based                                                | 17    |

\*Give information separately for cases and controls in case-control studies and, if applicable, for exposed and unexposed groups in cohort and cross-sectional studies.

**Note:** An Explanation and Elaboration article discusses each checklist item and gives methodological background and published examples of transparent reporting. The STROBE checklist is best used in conjunction with this article (freely available on the Web sites of PLoS Medicine at <http://www.plosmedicine.org/>, Annals of Internal Medicine at <http://www.annals.org/>, and Epidemiology at <http://www.epidem.com/>). Information on the STROBE Initiative is available at [www.strobe-statement.org](http://www.strobe-statement.org).

# BMJ Open

## A nonconcurrent cohort study to estimate the economic burden of infections following intramedullary nailing for a tibial shaft fracture in England

|                                 |                                                                                                                                                                                                                                                                                                                                                                                                                                                                                                                                                                                                         |
|---------------------------------|---------------------------------------------------------------------------------------------------------------------------------------------------------------------------------------------------------------------------------------------------------------------------------------------------------------------------------------------------------------------------------------------------------------------------------------------------------------------------------------------------------------------------------------------------------------------------------------------------------|
| Journal:                        | <i>BMJ Open</i>                                                                                                                                                                                                                                                                                                                                                                                                                                                                                                                                                                                         |
| Manuscript ID                   | bmjopen-2019-035404.R1                                                                                                                                                                                                                                                                                                                                                                                                                                                                                                                                                                                  |
| Article Type:                   | Original research                                                                                                                                                                                                                                                                                                                                                                                                                                                                                                                                                                                       |
| Date Submitted by the Author:   | 11-Jun-2020                                                                                                                                                                                                                                                                                                                                                                                                                                                                                                                                                                                             |
| Complete List of Authors:       | Galvain, Thibaut; Johnson and Johnson Medical Devices, Health Economics and Market Access<br>Chitnis, Abhishek ; Johnson and Johnson Medical Devices, Real World Analytics and Research<br>Paparouni, Konstantina; DePuy Synthes, Health Economics and Market Access<br>Tong, Cindy; Johnson and Johnson Medical Devices, Health Economics and Market Access<br>Holy, Chantal; Johnson and Johnson Medical Devices, Real World Analytics and Research<br>Giannoudis, Peter; Leeds Teaching Hospitals NHS Trust, Academic Department of Trauma and Orthopaedics; University of Leeds, School of Medicine |
| <b>Primary Subject Heading</b>: | Surgery                                                                                                                                                                                                                                                                                                                                                                                                                                                                                                                                                                                                 |
| Secondary Subject Heading:      | Epidemiology, Emergency medicine, Health economics, Infectious diseases                                                                                                                                                                                                                                                                                                                                                                                                                                                                                                                                 |
| Keywords:                       | ACCIDENT & EMERGENCY MEDICINE, WOUND MANAGEMENT, TRAUMA MANAGEMENT, EPIDEMIOLOGY, HEALTH ECONOMICS, Infection control < INFECTIOUS DISEASES                                                                                                                                                                                                                                                                                                                                                                                                                                                             |
|                                 |                                                                                                                                                                                                                                                                                                                                                                                                                                                                                                                                                                                                         |

SCHOLARONE™  
Manuscripts



I, the Submitting Author has the right to grant and does grant on behalf of all authors of the Work (as defined in the below author licence), an exclusive licence and/or a non-exclusive licence for contributions from authors who are: i) UK Crown employees; ii) where BMJ has agreed a CC-BY licence shall apply, and/or iii) in accordance with the terms applicable for US Federal Government officers or employees acting as part of their official duties; on a worldwide, perpetual, irrevocable, royalty-free basis to BMJ Publishing Group Ltd ("BMJ") its licensees and where the relevant Journal is co-owned by BMJ to the co-owners of the Journal, to publish the Work in this journal and any other BMJ products and to exploit all rights, as set out in our [licence](#).

The Submitting Author accepts and understands that any supply made under these terms is made by BMJ to the Submitting Author unless you are acting as an employee on behalf of your employer or a postgraduate student of an affiliated institution which is paying any applicable article publishing charge ("APC") for Open Access articles. Where the Submitting Author wishes to make the Work available on an Open Access basis (and intends to pay the relevant APC), the terms of reuse of such Open Access shall be governed by a Creative Commons licence – details of these licences and which [Creative Commons](#) licence will apply to this Work are set out in our licence referred to above.

Other than as permitted in any relevant BMJ Author's Self Archiving Policies, I confirm this Work has not been accepted for publication elsewhere, is not being considered for publication elsewhere and does not duplicate material already published. I confirm all authors consent to publication of this Work and authorise the granting of this licence.



1  
2  
3 1 **Title: A nonconcurrent cohort study to estimate the economic burden of infections**  
4  
5 2 **following intramedullary nailing for a tibial shaft fracture in England**

6  
7 3 Thibaut Galvain,<sup>1†</sup> Abhishek Chitnis,<sup>2</sup> Konstantina Paparouni,<sup>3</sup> Cindy Tong,<sup>4</sup> Chantal E Holy,<sup>2</sup>

8  
9 4 Peter V Giannoudis<sup>5</sup>

10  
11 5 1. Johnson and Johnson Medical Devices, Health Economics and Market Access,

12  
13 6 Issy-les-Moulineaux, FR. [tgalvain@its.jnj.com](mailto:tgalvain@its.jnj.com)

14  
15 7 2. Johnson and Johnson Medical Devices, Real World Analytics and Research, New Brunswick,

16  
17 8 NJ, USA. [achitni@its.jnj.com](mailto:achitni@its.jnj.com), [CHoly1@its.jnj.com](mailto:CHoly1@its.jnj.com)

18  
19 9 3. DePuy Synthes, Health Economics and Market Access, Zuchwil, CH. [kpaparouni@gmail.com](mailto:kpaparouni@gmail.com)

20  
21 10 4. Johnson and Johnson Medical Devices, Health Economics and Market Access, Somerville,

22  
23 11 NJ, USA. [stong2@its.jnj.com](mailto:stong2@its.jnj.com)

24  
25 12 5. Leeds Teaching Hospitals NHS Trust, Academic Department of Trauma and Orthopaedics,

26  
27 13 Leeds, West Yorkshire, UK; University of Leeds, School of Medicine, Leeds, West Yorkshire,

28  
29 14 UK. [pgiannoudi@aol.com](mailto:pgiannoudi@aol.com)

30  
31 15 †Corresponding author

32  
33 16 **Running head:**

34  
35 17 Resource use and costs in patients with and without infection after tibial fracture nailing

36  
37 18 **Key words:**

- 38  
39 19 • Tibial shaft fracture
- 40  
41 20 • CPRD
- 42  
43 21 • HES
- 44  
45 22 • Infection
- 46  
47 23 • Cost
- 48  
49 24 • England
- 50  
51  
52  
53  
54  
55  
56  
57  
58  
59  
60

1  
2  
3  
4  
5  
6  
7  
8  
9  
10  
11  
12  
13  
14  
15  
16  
17  
18  
19  
20  
21  
22  
23  
24  
25  
26  
27  
28  
29  
30  
31  
32  
33  
34  
35  
36  
37  
38  
39  
40  
41  
42  
43  
44  
45  
46  
47  
48  
49  
50  
51  
52  
53  
54  
55  
56  
57  
58  
59  
60

25

- Trauma

26

- Burden of disease

27

For peer review only

1  
2  
3 **28 Abstract**  
4

5  
6 **29 Objectives**  
7

8 30 Determine the impact of infections on direct costs and healthcare resource use in England for  
9  
10 31 patients undergoing intramedullary nailing (IMN) for tibial shaft fractures.  
11  
12

13 **32 Design**  
14

15 33 Nonconcurrent cohort based on retrospectively collected data with 2 years follow-up.  
16  
17

18 **34 Setting**  
19

20 35 England.  
21  
22

23 **36 Participants**  
24

25  
26 37 The study population included adult patients ( $\geq 18$  years) in England with a diagnosis of tibial  
27  
28 38 shaft fracture (ICD-10, S822) in the inpatient setting between May 2003 and June 2017 followed  
29  
30 39 by a procedure for IMN for tibial shaft fracture within 30 days. Patient data were derived from  
31  
32 40 the Clinical Practice Research Datalink (CPRD) linked to NHS Hospital Episode Statistics  
33  
34 41 datasets.  
35  
36

37 **42 Primary independent variable**  
38

39 43 Infection.  
40  
41

42 **44 Primary and secondary outcome measures**  
43  
44

45 45 The primary outcome was total inpatient costs from index stay admission through one-year of  
46  
47 46 follow-up. Secondary outcome included cumulative total healthcare costs, and resource  
48  
49 47 utilisation at 30 days, 90 days, 1 year and 2 years.  
50  
51  
52  
53  
54  
55  
56  
57  
58  
59  
60

## 48 **Results**

49 Overall, 805 patients met the inclusion criteria. At index inpatient stay, 3.7% had a post IMN  
50 infection, rising to 11.7% at 1-year. One-year inpatient costs were 80% higher for patients with  
51 infection ( $p < 0.001$ ). Total costs were estimated to be £14,756 (95% confidence interval [CI];  
52 £13,123, £16,593) for patients with infection versus £8,279 (95% CI; £7,946, £8,626). Length of  
53 stay (LOS), readmission, and reoperation were the key drivers of healthcare costs (all  $p < 0.001$ ).  
54 After adjustment, LOS was higher by 109% (95% CI: 62%, 169%), from 10.5 days to 21.9 days,  
55 for patients with infection. The odds of being readmitted or requiring reoperation were higher by  
56 5.18 times (95% CI: 3.01, 9.13) and 2.47 times (95% CI: 1.48, 4.09), respectively, for patients  
57 with infection versus those without infection.

## 58 **Conclusions**

59 Post IMN infection significantly increases inpatient costs, LOS, readmissions, and reoperations  
60 associated with tibial fracture fixation. Healthcare burden could be reduced through novel  
61 surgical site infection prevention strategies.

## 62 **Strengths and limitations of this study**

- 63 • This is the first study to quantify the healthcare resource burden of infections following  
64 tibial shaft fractures treated with intramedullary nailing in England.
- 65 • The study had a long term and cross-sector perspective that included inpatient, hospital  
66 outpatient and primary care parameters.
- 67 • This study only considered patients with complete follow-up, thus excluding very severe  
68 patients with short life expectancy.
- 69 • Some costs were not directly available from the CPRD dataset and were sourced from  
70 published national sources.

- 1  
2  
3 71 • The study relied on clinical codes to identify superficial and deep infections which may  
4  
5 72 be subject to coding errors and misclassifications.  
6  
7

### 8 73 **Introduction**

9  
10 74 Tibial shaft fractures are the most common type of long-bone fracture. They can be either  
11  
12 75 closed fractures, where the skin remains intact, or open fractures (accounting for 25% of all  
13  
14 76 tibial shaft fractures) where the skin is broken (1).  
15  
16

17 77 Intramedullary nailing is a common surgical treatment for this type of injury. Infection after  
18  
19 78 intramedullary nailing is a potential complication, especially in severe open fractures, that can  
20  
21 79 delay wound healing and fracture repair (2-5). If left untreated, an infection may lead to  
22  
23 80 permanent loss of function of the affected limb (2, 3, 6). Open fractures are especially prone to  
24  
25 81 infection due to wound exposure to the environment with the risk of infection depending on the  
26  
27 82 severity of soft tissue damage (4). Patients with cases of extreme and uncontrollable infection  
28  
29 83 may require limb amputation to prevent deterioration and maintain quality of life (2).  
30  
31

32 84 Infections following fracture fixation are subclassified according to the depth of the infection:  
33  
34 85 superficial (subcutaneous region), deep (muscle/fascial region), or organ/space infections (7).  
35  
36 86 However, there is debate over the usefulness of these terms, as they can be arbitrary  
37  
38 87 depending on the location of an infection (6). A US study reported an infection rate of 2% after  
39  
40 88 intramedullary nailing for closed fractures compared with 7.1% for open fractures (8). A Belgian  
41  
42 89 study reported an infection rate of 4.3% in patients with open or closed fractures, of which 1.4%  
43  
44 90 were deep (9). In a meta-analysis of studies investigating prophylactic antibiotic use in patients  
45  
46 91 with open tibial fractures treated with intramedullary nailing, the risk of infection increased with  
47  
48 92 severity of the fracture, rising to over 31% among patients with the most severe injury (and who  
49  
50 93 received systemic antibiotics only) (5).  
51  
52  
53  
54  
55  
56  
57  
58  
59  
60

1  
2  
3 94 Patients who experience infection are more likely to require additional surgeries, extended  
4  
5 95 hospital stays, and extensive treatment for post-operative infection (2-4, 6). There are only a  
6  
7 96 limited number of studies, however, which compare healthcare resource utilisation and  
8  
9 97 treatment costs for tibial shaft fractures with and without post-surgical infection across Europe.  
10  
11 98 In a Belgian study, healthcare costs were five times higher and total length of hospital stay  
12  
13 99 (LOS) six times longer for open tibial shaft fracture patients with deep infection versus those  
14  
15 100 with no infection (10). In Denmark, the average direct cost of treating a severe open tibial shaft  
16  
17 101 fracture was estimated to be €49,817, increasing to €81,155 when infection occurred. In  
18  
19 102 patients treated within 7 days of their injury, infection increased the average direct cost and LOS  
20  
21 103 by 124% and 135%, respectively (11).  
22  
23  
24

25 104 The aim of this nonconcurrent cohort study was to determine the impact of infections on  
26  
27 105 healthcare costs and resource utilisation for patients undergoing intramedullary nailing for tibial  
28  
29 106 shaft fractures from the perspective of National Health Service (NHS) England.  
30

## 31 107 **Materials and methods**

### 32 108 **Study design and setting**

33  
34  
35  
36  
37 109 This was a nonconcurrent cohort study based on retrospectively collected data of patients in  
38  
39 110 England who underwent intramedullary nailing for tibial shaft fracture (open or closed) and were  
40  
41 111 followed-up for 2 years. Data derived from the Clinical Practice Research Datalink (CPRD)  
42  
43 112 linked to NHS Hospital Episode Statistics (HES) and NHS Reference costs were used to  
44  
45 113 calculate costs and healthcare resource utilisation associated with infections (superficial or  
46  
47 114 deep) following intramedullary nailing.  
48  
49

50 115 The CPRD database is an anonymised longitudinal dataset of over 11.3 million medical records  
51  
52 116 from over 600 primary care practices across the UK (12). It includes all visits to primary care  
53  
54 117 and other healthcare professionals, reasons for visits, diagnoses observations, medical history,  
55  
56  
57  
58  
59  
60

1  
2  
3 118 test results, referrals, and prescriptions (12). For this study, HES data relating to admissions to,  
4  
5 119 or attendances at, English NHS healthcare providers was used (HES Admitted Patient Care  
6  
7 120 data).

## 10 121 **Patients**

11  
12 122 The study population included adults (aged  $\geq 18$  years) who were diagnosed with an isolated or  
13  
14 123 not tibial shaft fracture (ICD-10 code: S82.2) between May 2003 and June 2017 and who  
15  
16 124 subsequently underwent intramedullary nailing within 30 days of diagnosis. Inclusion and  
17  
18 125 exclusion criteria and patient attrition flow are depicted in Figure 1.

19  
20  
21 126 Infections were identified using clinical diagnosis codes either from the inpatient setting (ICD-10,  
22  
23 127 OPCS codes) or the primary care setting (Read codes) (See Additional file 1). Only patients with  
24  
25 128 an infection occurring on (or after) Day 2 following the index date were considered eligible for  
26  
27 129 the infection cohort, as this would exclude infections that were present pre-operatively. For  
28  
29 130 subgroup analysis, diagnosis codes were categorised into either deep or superficial infections  
30  
31 131 and open or closed fractures based on medical knowledge.

## 32 132 **Data collection**

33  
34  
35 133 The primary outcome of this study was total inpatient costs (Healthcare Resource Group [HRG],  
36  
37 134 unbundled HRG and specialised care) accrued beginning from index stay admission through  
38  
39 135 one-year of follow-up post-discharge from the index stay. Secondary endpoints included  
40  
41 136 cumulative total healthcare costs and resource utilisation for 30 days, 90 days, 1 year and  
42  
43 137 2 years of follow-up post discharge of the index stay. Total healthcare costs comprised  
44  
45 138 inpatient, hospital outpatient and primary care costs (consisting of consultations, prescriptions,  
46  
47 139 and tests/investigations). Healthcare resource utilisation included LOS, readmissions,  
48  
49 140 reoperations, days in intensive care unit (ICU), hospital outpatient visits, diagnostic tests, and  
50  
51 141 primary care visits. Time to infection was an additional secondary outcome.

## 142 **Resource use and costs**

143 Healthcare cost data were estimated based on the healthcare resource utilisation reported in  
144 CPRD/HES and the unit cost associated with each service from an NHS perspective. In  
145 England, NHS provides preventive medicine, primary care and hospital services to 88% of the  
146 citizens. Responsibility for publicly funded health care remains with the Secretary of State for  
147 Health, supported by the Department of Health (13). Hospitals are reimbursed by NHS  
148 according to the amount and type of activity that they perform using Healthcare Resource  
149 Groups (HRGs) (14).

### 150 ***Inpatient costs***

151 The 2017/2018 HRG Reference Costs Grouper software was used to generate HRG codes for  
152 each inpatient admission (15, 16). Each HRG code was assigned an appropriate cost from NHS  
153 Reference Costs (17), using admission method, LOS, trim point and the patient classification to  
154 associate the relevant costs (15, 18, 19). Inpatient stays were considered as long-stays for  
155 admissions lasting  $\geq 2$  days in line with NHS reference costs (18, 20). Unbundled HRGs were  
156 automatically generated by the Grouper software and assigned relevant costs (17). Specialised  
157 care episodes were identified using the Prescribed Specialised Services Tool 2017/18 software  
158 and top-up costs were applied as a percentage increase to the HRG cost (21).

### 159 ***Hospital outpatient costs***

160 Outpatient costs were derived from the CPRD referral file where the referral type was classified  
161 as “outpatient” and matched against NHS reference costs for the same or closest matching  
162 specialty (17, 19).

### 163 ***Primary care costs***



1  
2  
3 164 Consultations from the CPRD consultations file were categorised based on the setting (clinical,  
4  
5 165 surgery, home, telephone, administrative) and healthcare provider (doctor, nurse, other  
6  
7 166 professional). Costs were sourced from the Unit Costs of Health and Social Care (22).  
8  
9

10 167 Laboratory and diagnostic tests from the CPRD tests file were manually matched to the closest  
11  
12 168 NHS test category and assigned NHS Reference Costs (18).  
13

14 169 Medication categories were based on British National Formulary classifications as recorded in  
15  
16 170 the CPRD therapy file, and unit costs were obtained using the Prescription Cost Analysis 2017  
17  
18 171 using the mean sub-paragraph cost associated with each medication (23).  
19  
20

## 21 172 **Follow-up period and cohort definitions**

22

23  
24 173 Follow-up time was calculated as the difference between the index discharge date and the last  
25  
26 174 date of observation. Only patients with follow-up data at the relevant time point were included in  
27  
28 175 the analysis.  
29

## 30 176 **Statistical analyses**

31

32  
33 177 All analyses were conducted using R Studio v3.4.3. Statistical significance was set a priori at  
34  
35 178  $p < 0.05$  (two-sided). Study variables were analysed descriptively. Time-to-infection was depicted  
36  
37 179 graphically using the Kaplan-Meier estimator. Unadjusted comparisons of patient demographics,  
38  
39 180 comorbidities, and medication use between groups were performed using t-tests for continuous  
40  
41 181 variables that were approximately normal, and Wilcoxon rank sum tests for continuous variables  
42  
43 182 that were not normally distributed. Pre-specified subgroup analyses allowed for stratification of  
44  
45 183 results according to type of fracture (open versus closed) or type of infection (superficial versus  
46  
47 184 deep).  
48  
49

50 185 Generalised Linear Models were used to adjust for confounding, to isolate the association  
51  
52 186 between surgical site infection and the outcomes. Covariates were identified a priori as risk  
53  
54 187 factors for the study outcomes based on clinical knowledge. A backwards stepwise procedure  
55  
56  
57  
58  
59  
60

188 was applied according to Akaike information criterion. Missing data were not imputed. Except for  
189 in the sensitivity analyses, patients with missing data were excluded from analyses.

190 Sensitivity analyses at all time points were conducted using data from the subgroup of patients  
191 who had complete two-year follow-up for total costs, LOS, readmission (rate and mean count),  
192 and reoperation (rate and mean count).

### 193 **Patient and public Involvement**

194 Patients or the public were not involved in the design, or conduct, or reporting, or dissemination  
195 plans of our research.

## 196 **Results**

### 197 **Patient baseline characteristics**

198 Of the 10,825 patients identified as having suffered a tibial shaft fracture, 3,005 received  
199 intramedullary nailing. Of these, a total of 805 patients met the inclusion criteria and were  
200 included in the study (Figure 1). The mean follow-up time was 4.8 years. The mean (standard  
201 deviation [SD]) age was 40.8 (17.2) (See Table 1 for index stay; Additional file 2). A majority of  
202 patients were male (n= 590; 73.3%) and most had suffered a closed (n=663; 82.4%) tibial shaft  
203 fracture. Among patients with an open fracture, a significantly higher proportion of patients  
204 (10.6%) experienced an infection compared with 2.3% of patients with a closed fracture  
205 (p<0.001; Table 1).

### 206 **Figure 1. Patient screening and enrolment according to the study inclusion/exclusion** 207 **criteria**

208

209

210 **Table 1. Patient demographic and clinical characteristics at index**

|                                                                                          | All enrolled patients (N=805) | Index stay           |                  | p-value |
|------------------------------------------------------------------------------------------|-------------------------------|----------------------|------------------|---------|
|                                                                                          |                               | No infection (N=775) | Infection (N=30) |         |
| <b>Demographics</b>                                                                      |                               |                      |                  |         |
| Age (years), mean (SD)                                                                   | 40.8 (17.2)                   | 40.7 (16.8)          | 43.0 (23.9)      | 0.61    |
| Gender, n (%)                                                                            |                               |                      |                  | 0.84    |
| Male                                                                                     | 590 (73.3)                    | 569 (73.4)           | 21 (70.0)        |         |
| <b>Clinical history/comorbidities</b>                                                    |                               |                      |                  |         |
| Charlson score, median (range)                                                           | 0.00 (3.00)                   | 0.00 (2.00)          | 0.00 (3.00)      | <0.001  |
| Smoker, n (%)                                                                            | 256 (31.8)                    | 247 (31.9)           | 9 (30.0)         | 0.99    |
| Diabetes, n (%)                                                                          | 27 (3.4)                      | 27 (3.5)             | 0 (0.0)          | 0.62    |
| COPD, n (%)                                                                              | 8 (1.0)                       | 8 (1.0)              | 0 (0.0)          | 1.00    |
| Congestive heart failure, n (%)                                                          | 2 (0.3)                       | 2 (0.3)              | 0 (0.0)          | 1.00    |
| Hypertension, n (%)                                                                      | 12 (1.5)                      | 12 (1.6)             | 0 (0.0)          | 1.00    |
| Compartment syndrome, n (%)                                                              | 27 (3.4)                      | 22 (2.8)             | 5 (16.7)         | <0.01   |
| <b>Index episode</b>                                                                     |                               |                      |                  |         |
| Inpatient waiting time (days) for surgery, mean (SD)                                     | 1.4 (2.4)                     | 1.4 (2.4)            | 0.70 (2.4)       | 0.14    |
| Fracture type, n (%)                                                                     |                               |                      |                  | <0.001  |
| Open fracture                                                                            | 142 (17.6)                    | 127 (16.4)           | 15 (50.0)        |         |
| Received ≥1 prescription for antibiotics in the 12 months prior to the index stay, n (%) | 60 (7.5)                      | 60 (7.7)             | 0 (0.00)         | 0.16    |
| Received ≥1 prescription for opioids in the 12 months prior to the index stay, n (%)     | 16 (2.0)                      | 15 (1.9)             | 1 (3.3)          | 0.46    |

211 Abbreviations: COPD, chronic obstructive pulmonary disease; SD, standard deviation.

212

213 **Infection rates**

214 During the index stay, 30 patients (3.7%) experienced an infection. Among patients with 30-day,  
 215 90-day, 1-year, and 2-years post-discharge follow-up data, infection rates were respectively:  
 216 8.0%, 9.2%, 11.7%, and 13.4%, (Figure 2).

217 **Figure 2. Cumulative percentage of infection events recorded post-index date**

218

219 **One-year inpatient costs**

220 Among patients with index stay plus 1-year post discharge data (N=686), the mean 1-year total  
 221 inpatient cost was significantly higher among patients who experienced an infection (£15,580;

222 n=80) compared with patients without infection (£7,746;  $p<0.001$ ). After adjusting for fracture  
 223 type (open/closed), age, smoking status, index year, diabetes, COPD, inpatient waiting time for  
 224 surgery and compartment syndrome, mean costs were 80% (95% CI: 58%, 104%) higher,  
 225 respectively (£13,672 [95% CI: £12,122, £15,420] versus £7,616 [95% CI: £7,301, £7,944];  
 226  $p<0.001$ ), (Figure 3).

### 227 **One-year total costs**

228 Adjusted total costs were £14,756 (95% CI: £13,123, £16,593) among patients who experienced  
 229 an infection versus £8,279 (95% CI: £7,946, £8,626;  $p<0.001$ ) in patients without infection – a  
 230 78% increase in total costs as a result of infection (95% CI: 57%, 102%) (Figure 3).

### 231 **Figure 3. Breakdown of 1-year total costs by infection status (adjusted analysis)**

232 Abbreviations: ns, not significant; CI, confidence interval.

233 \*\*\*  $p<0.001$

### 235 **One-year healthcare resource use**

236 For the majority of healthcare resource categories, presence of infection was associated with a  
 237 statistically significant increase in resource use versus no infection (Table 2). Key drivers of  
 238 increased costs were LOS, readmission, and reoperation rates, which were all significantly  
 239 higher in patients with infections (all  $p<0.001$ ). After adjustment, LOS was increased by 109%  
 240 (95% CI: 62%, 169%) from 10.5 days to 21.9 days. The odds of being readmitted or requiring  
 241 reoperation due to infection was increased by 5.18 times (95% CI: 3.01, 9.13) and 2.47 times  
 242 (95% CI: 1.48, 4.09), respectively.

243 **Table 2. 1-year healthcare resource use by infection status**

|           | Multivariate analysis                    |                                    |           |
|-----------|------------------------------------------|------------------------------------|-----------|
|           | No infection<br>(N=606)<br>Mean (95% CI) | Infection<br>N=80<br>Mean (95% CI) | p-value   |
| LOS, days | 10.5 (9.7, 11.4)                         | 21.9 (17.3, 27.7)                  | $p<0.001$ |

|                                         | Multivariate analysis                    |                                    |         |
|-----------------------------------------|------------------------------------------|------------------------------------|---------|
|                                         | No infection<br>(N=606)<br>Mean (95% CI) | Infection<br>N=80<br>Mean (95% CI) | p-value |
| ICU LOS, days                           | 0.01 (0.01, 0.02)                        | 0.01 (0.00, 0.02)                  | p=0.91  |
| Number of readmissions                  | 0.5 (0.5, 0.6)                           | 1.5 (1.2, 1.8)                     | p<0.001 |
| Readmission rate, %                     | 35.9 (32.1, 39.9)                        | 74.4 (63.4, 83.0)                  | p<0.001 |
| Number of reoperations                  | 0.2 (0.2, 0.3)                           | 0.6 (0.5, 0.8)                     | p<0.001 |
| Reoperations rate, %                    | 20.3 (17.2, 23.8)                        | 38.6 (28.3, 50.0)                  | p<0.001 |
| Number of hospital outpatient referrals | 1.8 (1.6, 2.1)                           | 1.7 (1.2, 2.1)                     | p=0.44  |
| Primary care resource use               |                                          |                                    |         |
| Number of primary care events           | 30.9 (29.2, 32.7)                        | 45.9 (39.0, 54.0)                  | p<0.001 |
| Number of tests and examinations        | 14.0 (11.4, 16.6)                        | 22.1 (13.9, 31.3)                  | p=0.052 |

Abbreviations: CI, confidence interval; ICU, intensive care unit; LOS, length of stay

### 245 Total costs from index stay to two years follow-up

246 At all-time points mean total costs were statistically significantly higher for patients with an  
247 infection compared with those without (p<0.001), (Figure 4). Adjusted mean total costs of care  
248 in patients with infection versus no infection over time were: £11,257 versus £7,017 at 30 days;  
249 £11,949 versus £7,423 at 90 days; and £16,626 versus £9,439 at 2 years (all p<0.001).

### 250 Figure 4. Total costs from index stay to 2 years follow-up

251 Abbreviations: CI, confidence interval.

252 \*\*\* p<0.001. Data plotted are means +/- 95% CI.

### 254 Healthcare resource use from index stay to two years follow-up

255 Multivariate analysis demonstrated that LOS, readmissions (rate and mean; Figure 5), and  
256 reoperations (rate and mean; Figure 6), were consistently higher at all timepoints among  
257 patients who experienced an infection compared with those who did not (p<0.001). At 30 days,  
258 infection increased the adjusted LOS from 8.9 days to 15.0 days and at 2 years from 11.3 days  
259 to 24.6 days (both p<0.001). The adjusted readmission rate increased from 7.1% at 30 days to  
260 51.3% at 2 years follow-up in patients without infection compared with an increase from 44.1%

261 to 77.6% in the infection group (Figure 5). The adjusted reoperation rate increased from 1.3% at  
262 30 days to 31.2% at 2 years in the absence of infection, whereas in the infection group, the rate  
263 increased from 11.5% to 49.0% (Figure 6).

264 **Figure 5. Readmission (adjusted) according to follow-up time: (A) readmission rate and**  
265 **(B) mean number of readmissions per patient**

266  
267 Abbreviations: CI, confidence interval.

268 \*\*\*  $p < 0.001$ . Data plotted are means  $\pm$  95% CI.

270 **Figure 6. Reoperation (adjusted) according to follow-up time: (A) reoperation rate and (B)**  
271 **mean number of reoperations per patient**

272  
273 Abbreviations: CI, confidence interval.

274 \*\*  $p < 0.01$ , \*\*\*  $p < 0.001$ . Data plotted are means  $\pm$  95% CI.

276 **Subgroup analyses**

277 Multivariate analysis by infection type resulted in mean 1-year inpatient costs of £7,614,  
278 £12,814 and £15,513, respectively for no infection ( $n=606$ ), superficial infection ( $n=54$ ) and  
279 deep infection ( $n=26$ ) (Additional file 2). Analysis by fracture type showed a higher 1-year  
280 infection rate among patients with open fractures (27.4%) versus closed fractures (8.6%). Mean  
281 adjusted inpatient costs at 1 year for patients with and without infection were £19,542 versus  
282 £9,495 for patients with open fractures and £12,178 versus £7,278 for patients with closed  
283 fractures.

284 **Sensitivity analyses**

285 A total of 588 patients (73%) out of the 805 patients at index had data for the full 2-year follow-  
286 up period. Results for total costs, LOS, readmissions (rate and mean), and reoperations (rate

1  
2  
3 287 and mean) at each time point were consistent with those of the primary analyses (Additional file  
4  
5 288 2).

## 6 7 289 **Discussion**

8  
9  
10 290 This study used CPRD-linked HES data to determine the impact of infection on English  
11  
12 291 healthcare costs and resource utilisation associated with patients undergoing intramedullary  
13  
14 292 nailing for tibial fracture. Infection rates at 1-year and 2-years (11.7% and 13.4%, respectively)  
15  
16 293 were comparable with the 10.5% rate reported in a 2014 meta-analysis (5). Mean inpatient  
17  
18 294 costs measured after 1 year were predicted to be 80% higher (£6,056) for patients with infection  
19  
20 295 compared with those without infection, while overall costs were 78% higher. The greatest cost  
21  
22 296 drivers were hospital LOS (109% increase at 1 year), readmissions (odds of being readmitted  
23  
24 297 increased by 5.18 times at 1 year), and reoperations (odds of reoperation increased by 2.47  
25  
26 298 times at 1 year). The 2-year follow-up in this study meant that we were able to capture changes  
27  
28 299 in resource use over time associated with infection, such as readmission and reoperation. The  
29  
30 300 findings of this study highlight the substantial impact on healthcare resource utilisation and costs  
31  
32 301 to the English NHS, from both the hospital and primary care perspective.

33  
34  
35  
36 302 This study is the first to quantify the additional healthcare resource burden of infections following  
37  
38 303 tibial fractures treated with intramedullary nailing in England with a long-term perspective which  
39  
40 304 includes inpatient, hospital outpatient and primary care parameters. Differences in healthcare  
41  
42 305 systems, patient populations and treatment pathways make direct comparison with studies from  
43  
44 306 other countries challenging; however, our findings are in line with results of studies from  
45  
46 307 Belgium and Denmark (10, 11). Hoekstra et al. demonstrated five times higher healthcare costs  
47  
48 308 and six times longer LOS for open tibial shaft fracture patients with deep infection versus those  
49  
50 309 without infection in Belgium (10). Although the magnitude of the increase in costs and LOS  
51  
52 310 observed in our study is not as substantial, differences in patient populations may be a  
53  
54 311 contributing factor, as Hoekstra et al. did not limit their study population to intramedullary nail

1  
2  
3 312 fixation (10). In their Danish study, Olesen et al. estimated a 60% increase in direct costs and  
4  
5 313 an 80% increase in LOS resulting from infected open tibial fractures (11), consistent with the  
6  
7 314 magnitude of the increase observed in the current study; absolute LOS (74 days) and direct  
8  
9 315 healthcare costs (€81,155) in the presence of infection were substantially higher than in our  
10  
11 316 study, however, which may in part reflect the most severe types of wounds considered in the  
12  
13 317 Danish study, all of which were open fractures and 80% of which were Gustilo-Anderson  
14  
15 318 classification 3. Furthermore, a US-study found that surgical site infections nearly doubled  
16  
17 319 inpatient costs to \$109,000 in patients with isolated fractures (24).  
18  
19  
20 320 Surgical site infections remain one of the most challenging complications in trauma surgery (25).  
21  
22 321 Over the past decades, surgical site infection incidence has decreased, especially deep  
23  
24 322 infections in patients with open tibial fractures (26). The question remained whether these rates  
25  
26 323 could be decreased further. Still, no infections occurred in two studies in complex tibial fracture  
27  
28 324 patients treated with antibiotic coated intramedullary tibia nails (27, 28). Based on consensus  
29  
30 325 opinions, they may be a promising option for prevention of surgical site infections in open  
31  
32 326 fractures or revision cases (29). Other approaches to prevent infections through local delivery of  
33  
34 327 antibacterials were based on specialized biomaterials formulated as additives in bone void fillers  
35  
36 328 such as bone cement or bacteriostatic bone substitute materials (25, 30, 31). Moreover, in order  
37  
38 329 to prevent infections, open fractures should be managed according to the UK NICE guideline  
39  
40 330 and the Open fracture BOAST (32, 33).  
41  
42  
43  
44 331 This study is subject to the following limitations: 1) potential bias in the patient population as we  
45  
46 332 only considered patients with complete follow-up, thus excluding very severe patients with short  
47  
48 333 life expectancy or with few comorbidities, limiting the generalizability of the findings to this  
49  
50 334 subgroup; 2) identification of relevant patients for inclusion in the study was based on OPCS,  
51  
52 335 ICD-10 and primary care-based read codes. The data may be susceptible to coding errors and  
53  
54 336 misclassifications. Surgical site infections were defined following the CDC criteria (34, 35).  
55  
56  
57  
58  
59  
60



1  
2  
3 337 Recently it became clear that the CDC definition for infection probably is not sufficient to define  
4  
5 338 fracture-related infections. One important reason is the fact that the subdivision of infection into  
6  
7 339 superficial and deep infection is arbitrary (36). However, the use of the CDC definition was  
8  
9 340 standard during our study period (2003 – 2017); 3) medication use was costed as recorded in  
10  
11 341 CPRD , i.e. averaged to the cost of the drug family/British National Formulary sub-paragraph; 4)  
12  
13 342 dispensing costs were not included 5) outpatient specialties from CPRD did not always exactly  
14  
15 343 match outpatient specialty categories from NHS Reference Costs; when there was not an exact  
16  
17 344 match, the closest matching specialty was chosen; 6) costs were not directly available from the  
18  
19 345 CPRD dataset and hence unit costs had to be sourced from published national sources for  
20  
21 346 primary and secondary care and for drug prices; 7) economic assessment was limited to direct  
22  
23 347 healthcare costs while infections could lead to permanent functional loss and potentially  
24  
25 348 increase in secondary costs (25); 8) all potential confounders could not be adjusted for, limiting  
26  
27 349 the association between increased healthcare resource utilizations and costs with surgical site  
28  
29 350 infections.

30  
31  
32  
33 351 Our study provides important evidence as to the short- to mid-term direct economic  
34  
35 352 consequences of infection following tibial fractures. By increasing the sample size, the impact of  
36  
37 353 infection type (superficial/deep) and fracture type (open/closed) could have been explored more  
38  
39 354 robustly. Additional validation of clinical codes used to identify relevant data would have allowed  
40  
41 355 us to account for any potential variation in clinical coding practice. Broadening the perspective  
42  
43 356 to include indirect costs would allow the additional burden of infection to be established, such as  
44  
45 357 rehabilitation and absenteeism.

## 46 47 48 358 **Conclusion**

49  
50  
51 359 This study confirms that infection presents a substantial healthcare burden, leading to  
52  
53 360 significantly increased hospital LOS, need for hospital readmission and reoperation, and  
54  
55 361 increased use of GPs and other primary care resources. As such there exists an unmet need for  
56  
57  
58  
59  
60

362 alternative medical technologies and infection prevention strategies that could help to reduce  
363 infections in tibial shaft fractures and reduce costs. Our study indicates that the potential mid-  
364 term (1–2 years) saving to the English NHS of is around £6,500 per patient.

## 366 **Declarations**

### 367 **Ethics approval and consent to participate**

368 The study protocol was approved by the Independent Scientific Advisory Committee for  
369 Medicines and Healthcare products Regulatory Agency database research (ISAC) on 27  
370 November 2017 (ISAC Protocol: 17-132R). General ethical approval for observational research  
371 using the CPRD with approval from the ISAC was granted by a Health Research Authority  
372 Research Ethics Committee (East Midlands – Derby; reference number: 05/MRE04/87).

### 373 **Consent for publication**

374 Not applicable

### 375 **Availability of data and material**

376 The data that support the findings of this study are available from Clinical Practice Research  
377 Datalink (CPRD), but restrictions apply to the availability of these data, which were used under  
378 license for the current study, and so are not publicly available.

### 379 **Competing interests**

380 Peter Giannoudis received honoraria from DePuy Synthes for his involvement in this study.  
381 Thibaut Galvain, Abhishek Chitnis, Cindy Tong, and Chantal Holy are employees of Johnson  
382 and Johnson Medical Devices. Konstantina Paparouni is an employee of DePuy Synthes. The  
383 funding corporations could have affected the study design, analysis and manuscript writing; but  
384 authors owned final decisions.

### 385 **Funding**

386 This study was sponsored by DePuy Synthes.

## 387 **Authors' contributions**

388 Study conception and design: TG, PVG, CEH, KP, CT and AC. Acquisition of data: TG, PVG,  
389 CT and AC. Data analysis: TG, CT and AC. Interpretation of data and results: TG, PVG, CEH,  
390 KP, CT and AC. Drafting of manuscript: TG, PVG, CEH, KP, CT and AC. Critical revision: TG,  
391 PVG, CEH, KP, CT and AC. Project management: KP.

## 392 **Acknowledgements:**

393 We thank James Woolnough (Mtech Access) who provided medical writing services in the  
394 preparation of the manuscript, funded by DePuy Synthes.

## 395 **Abbreviations**

396 BOAST, British Orthopaedic Association Standards for Trauma & Orthopaedic; CI, confidence  
397 interval; COPD, chronic obstructive pulmonary disease; CPRD, Clinical Practice Research  
398 Datalink; GP, general practitioner; HES, Hospital Episode Statistics; HRG, Healthcare Resource  
399 Group; ICU, intensive care unit; ISAC, Independent Scientific Advisory Committee; LOS, length  
400 of stay; NA, not applicable; NICE, National Institute for Health and Care Excellence; NHS,  
401 National Health Service; SD, standard deviation.

## 402 **References**

- 403 1. Duan X, Al-Qwbani M, Zeng Y, Zhang W, Xiang Z. Intramedullary nailing for tibial shaft  
404 fractures in adults. *Cochrane Database Syst Rev*. 2012;1:CD008241.
- 405 2. Elniel AR, Giannoudis PV. Open fractures of the lower extremity: Current management  
406 and clinical outcomes. *EFORT Open Rev*. 2018;3(5):316-25.
- 407 3. Kanakaris NK, Tosounidis TH, Giannoudis PV. Surgical management of infected non-  
408 unions: An update. *Injury*. 2015;46 Suppl 5:S25-32.
- 409 4. Smith EJ, Kuang X, Pandarinath R. Comparing hospital outcomes between open and  
410 closed tibia fractures treated with intramedullary fixation. *Injury*. 2017;48(7):1609-12.
- 411 5. Craig J, Fuchs T, Jenks M, Fleetwood K, Franz D, Iff J, et al. Systematic review and  
412 meta-analysis of the additional benefit of local prophylactic antibiotic therapy for infection rates  
413 in open tibia fractures treated with intramedullary nailing. *Int Orthop*. 2014;38(5):1025-30.
- 414 6. Metsemakers WJ, Kortram K, Morgenstern M, Moriarty TF, Meex I, Kuehl R, et al.  
415 Definition of infection after fracture fixation: A systematic review of randomized controlled trials  
416 to evaluate current practice. *Injury*. 2018;49(3):497-504.
- 417 7. Centre for Disease Control. National Healthcare Safety Network (NHSN) Patient Safety  
418 Component Manual, . 2018.
- 419 8. Auston DA, Meiss J, Serrano R, Sellers T, Carlson G, Hoggard T, et al. Percutaneous or  
420 Open Reduction of Closed Tibial Shaft Fractures During Intramedullary Nailing Does Not

- 1  
2  
3 421 Increase Wound Complications, Infection or Nonunion Rates. *J Orthop Trauma*.  
4 422 2017;31(4):215-9.
- 5 423 9. Metsemakers WJ, Handojo K, Reynders P, Sermon A, Vanderschot P, Nijs S. Individual  
6 424 risk factors for deep infection and compromised fracture healing after intramedullary nailing of  
7 425 tibial shaft fractures: a single centre experience of 480 patients. *Injury*. 2015;46(4):740-5.
- 8 426 10. Hoekstra H, Smeets B, Metsemakers WJ, Spitz AC, Nijs S. Economics of open tibial  
9 427 fractures: the pivotal role of length-of-stay and infection. *Health Econ Rev*. 2017;7(1):32.
- 10 428 11. Olesen UK, Pedersen NJ, Eckardt H, Lykke-Meyer L, Bonde CT, Singh UM, et al. The  
11 429 cost of infection in severe open tibial fractures treated with a free flap. *Int Orthop*.  
12 430 2017;41(5):1049-55.
- 13 431 12. Herrett E, Gallagher AM, Bhaskaran K, Forbes H, Mathur R, van Staa T, et al. Data  
14 432 Resource Profile: Clinical Practice Research Datalink (CPRD). *Int J Epidemiol*. 2015;44(3):827-  
15 433 36.
- 16 434 13. Boyle S. United Kingdom (England): Health system review. *Health Syst Transit*.  
17 435 2011;13(1):1-483, xix-xx.
- 18 436 14. Bojke C, Grasic K, Street A. How should hospital reimbursement be refined to support  
19 437 concentration of complex care services? *Health Econ*. 2018;27(1):e26-e38.
- 20 438 15. Canavan C, West J, Card T. Calculating Total Health Service Utilisation and Costs from  
21 439 Routinely Collected Electronic Health Records Using the Example of Patients with Irritable  
22 440 Bowel Syndrome Before and After Their First Gastroenterology Appointment.  
23 441 *Pharmacoeconomics*. 2016;34(2):181-94.
- 24 442 16. National Health Service. Costing - HRG4+ 2017/18 Reference Costs Grouper 2017  
25 443 [Available from: [https://digital.nhs.uk/services/national-casemix-office/downloads-grouper-and-](https://digital.nhs.uk/services/national-casemix-office/downloads-grouper-and-tools/costing-hrg4-2017-18-reference-costs-grouper)  
26 444 [tools/costing-hrg4-2017-18-reference-costs-grouper](https://digital.nhs.uk/services/national-casemix-office/downloads-grouper-and-tools/costing-hrg4-2017-18-reference-costs-grouper).]
- 27 445 17. NHS Improvement. National schedule of reference costs 2016/17 2017 [Available from:  
28 446 <https://improvement.nhs.uk/resources/reference-costs/>.]
- 29 447 18. Achana FA, Fleming KM, Tata LJ, Sultan AA, Petrou S. Peripartum hysterectomy: an  
30 448 economic analysis of direct healthcare costs using routinely collected data. *BJOG*.  
31 449 2018;125(7):874-83.
- 32 450 19. Danese MD, Gleeson M, Griffiths RI, Catterick D, Kutikova L. Methods for estimating  
33 451 costs in patients with hyperlipidemia experiencing their first cardiovascular event in the United  
34 452 Kingdom. *J Med Econ*. 2017;20(9):931-7.
- 35 453 20. NHS Department of Health. A simple guide to Payment by Results. 2012.
- 36 454 21. NHS England and NHS Improvement. NHS National tariff payment system 2017/18 and  
37 455 2018/19.
- 38 456 22. Curtis L, Burns A. Unit Costs of Health and Social Care 2017. Available at:  
39 457 <https://www.pssru.ac.uk/project-pages/unit-costs/unit-costs-2017/> (Accessed: 9 Nov 2018).
- 40 458 23. NHS Digital. Prescription Cost Analysis - England, 2017 2018 [Available from:  
41 459 [https://digital.nhs.uk/data-and-information/publications/statistical/prescription-cost-](https://digital.nhs.uk/data-and-information/publications/statistical/prescription-cost-analysis/prescription-cost-analysis-england-2017)  
42 460 [analysis/prescription-cost-analysis-england-2017](https://digital.nhs.uk/data-and-information/publications/statistical/prescription-cost-analysis/prescription-cost-analysis-england-2017).]
- 43 461 24. Thakore RV, Greenberg SE, Shi H, Foxx AM, Francois EL, Prablek MA, et al. Surgical  
44 462 site infection in orthopedic trauma: A case-control study evaluating risk factors and cost. *J Clin*  
45 463 *Orthop Trauma*. 2015;6(4):220-6.
- 46 464 25. Metsemakers WJ, Kuehl R, Moriarty TF, Richards RG, Verhofstad MHJ, Borens O, et al.  
47 465 Infection after fracture fixation: Current surgical and microbiological concepts. *Injury*.  
48 466 2018;49(3):511-22.
- 49 467 26. Ktistakis I, Giannoudi M, Giannoudis PV. Infection rates after open tibial fractures: are  
50 468 they decreasing? *Injury*. 2014;45(7):1025-7.
- 51 469 27. Metsemakers WJ, Reul M, Nijs S. The use of gentamicin-coated nails in complex open  
52 470 tibia fracture and revision cases: A retrospective analysis of a single centre case series and  
53 471 review of the literature. *Injury*. 2015;46(12):2433-7.

- 1  
2  
3 472 28. Fuchs T, Stange R, Schmidmaier G, Raschke MJ. The use of gentamicin-coated nails in  
4 473 the tibia: preliminary results of a prospective study. Arch Orthop Trauma Surg.  
5 474 2011;131(10):1419-25.
- 6 475 29. Metsemakers WJ, Fragomen AT, Moriarty TF, Morgenstern M, Egol KA, Zalavras C, et  
7 476 al. Evidence-Based Recommendations for Local Antimicrobial Strategies and Dead Space  
8 477 Management in Fracture-Related Infection. J Orthop Trauma. 2020;34(1):18-29.
- 9 478 30. Buchholz HW, Engelbrecht H. [Depot effects of various antibiotics mixed with Palacos  
10 479 resins]. Chirurg. 1970;41(11):511-5.
- 11 480 31. van Gestel NA, Geurts J, Hulsen DJ, van Rietbergen B, Hofmann S, Arts JJ. Clinical  
12 481 Applications of S53P4 Bioactive Glass in Bone Healing and Osteomyelitic Treatment: A  
13 482 Literature Review. Biomed Res Int. 2015;2015:684826.
- 14 483 32. Fractures (complex): assessment and management. NICE guideline. National Institute  
15 484 for Health and Care Excellence. 2017.
- 16 485 33. BOAST - Open Fractures. British Orthopaedic Association. 2017.
- 17 486 34. Mangram AJ, Horan TC, Pearson ML, Silver LC, Jarvis WR. Guideline for Prevention of  
18 487 Surgical Site Infection, 1999. Centers for Disease Control and Prevention (CDC) Hospital  
19 488 Infection Control Practices Advisory Committee. Am J Infect Control. 1999;27(2):97-132; quiz 3-  
20 489 4; discussion 96.
- 21 490 35. Horan TC, Gaynes RP, Martone WJ, Jarvis WR, Emori TG. CDC definitions of  
22 491 nosocomial surgical site infections, 1992: a modification of CDC definitions of surgical wound  
23 492 infections. Infect Control Hosp Epidemiol. 1992;13(10):606-8.
- 24 493 36. Metsemakers WJ, Morgenstern M, McNally MA, Moriarty TF, McFadyen I, Scarborough  
25 494 M, et al. Fracture-related infection: A consensus on definition from an international expert group.  
26 495 Injury. 2018;49(3):505-10.
- 27  
28  
29  
30  
31

## 32 497 **Additional files**

- 33  
34 498 1. Additional file 1:
- 35  
36 499 a. Format: "Additional file1.pdf"
- 37  
38 500 b. Title: Study protocol
- 39  
40 501 c. Description: this additional file includes the study protocol and its appendix  
41  
42 502 composed of clinical and procedure codes
- 43  
44 503 2. Additional file 2:
- 45  
46 504 a. Format: "Additional file2.pdf"
- 47  
48 505 b. Title: Baseline and results at all time points
- 49  
50 506 c. Description: this additional file includes the baseline demographics and results at  
51  
52 507 all time points that could not be integrated in the manuscript.
- 53  
54  
55  
56  
57  
58  
59  
60

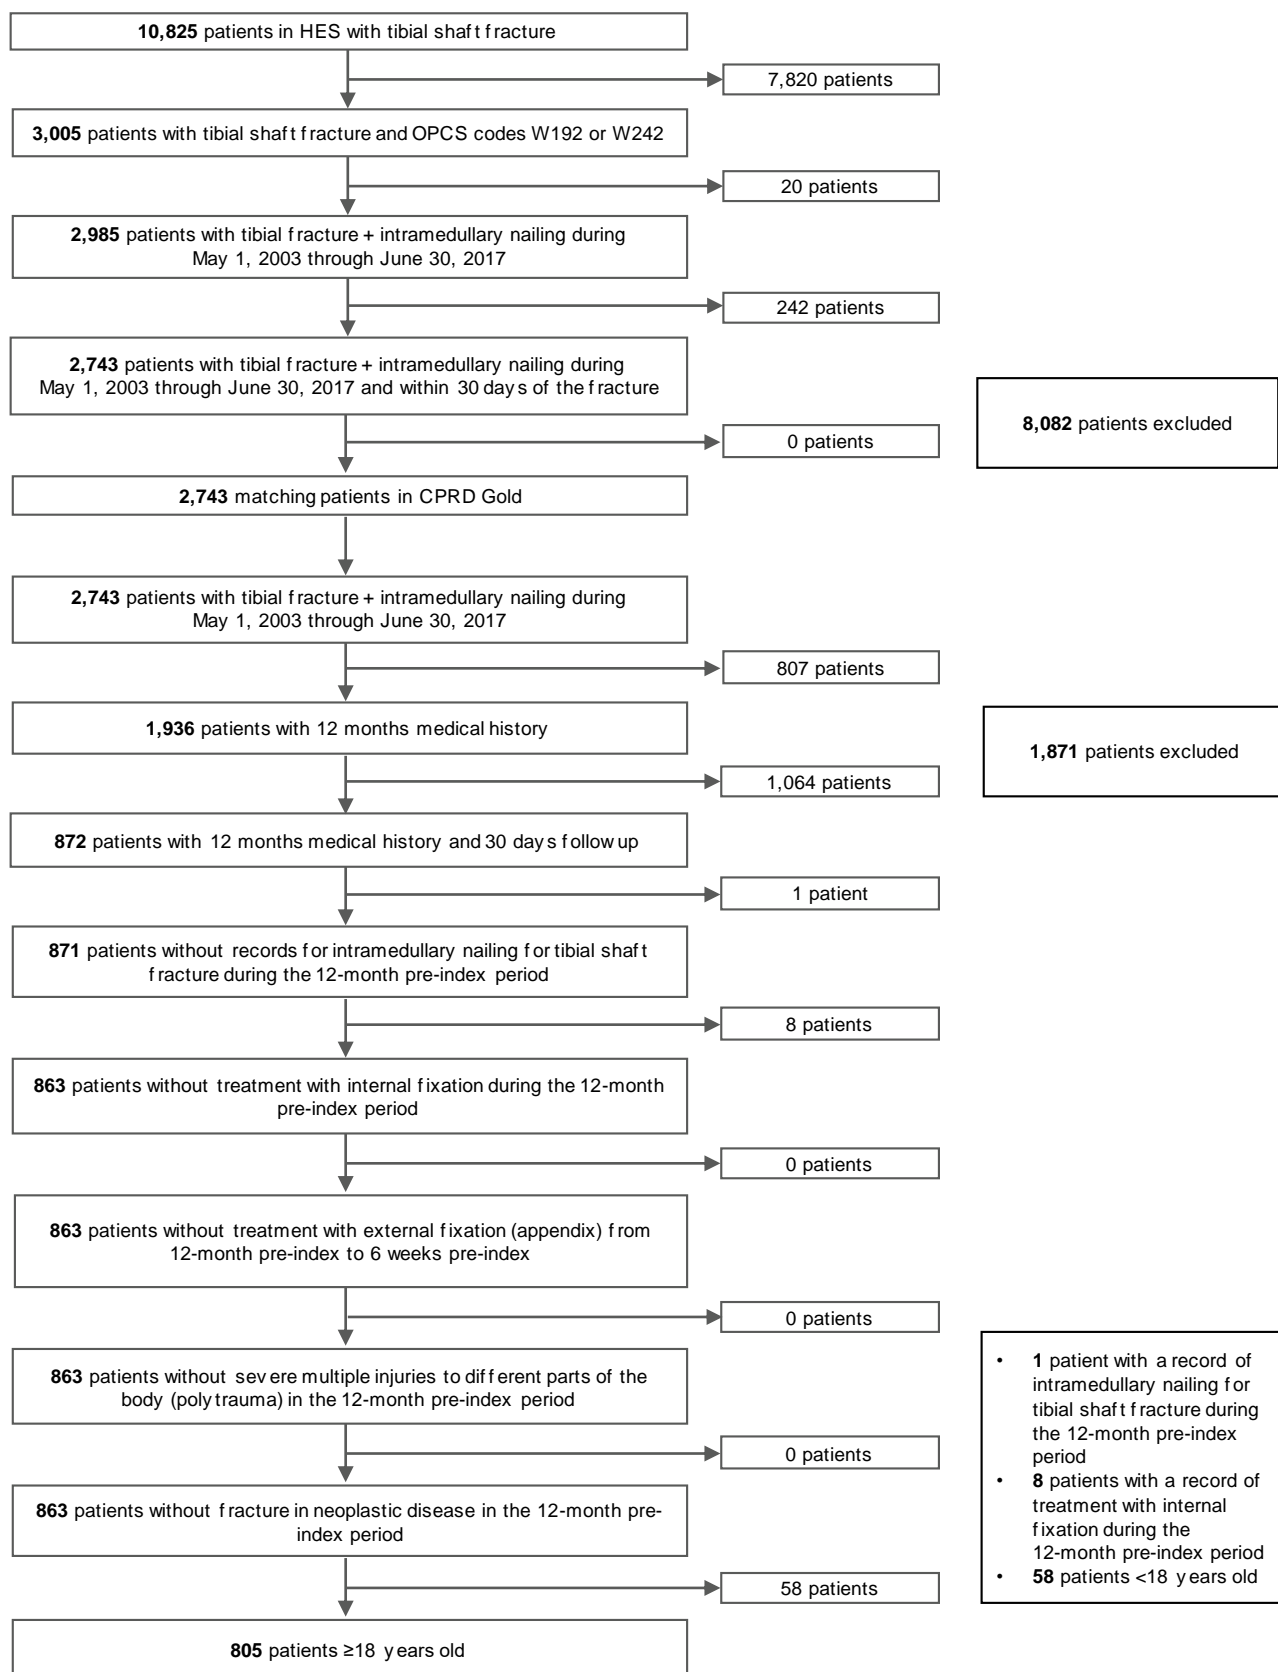

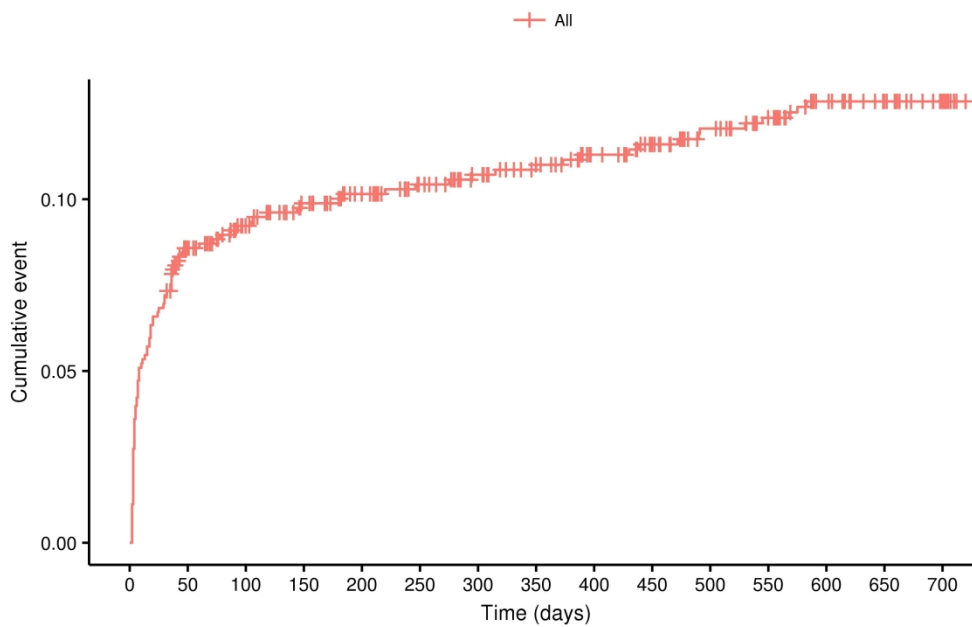

152x101mm (600 x 600 DPI)

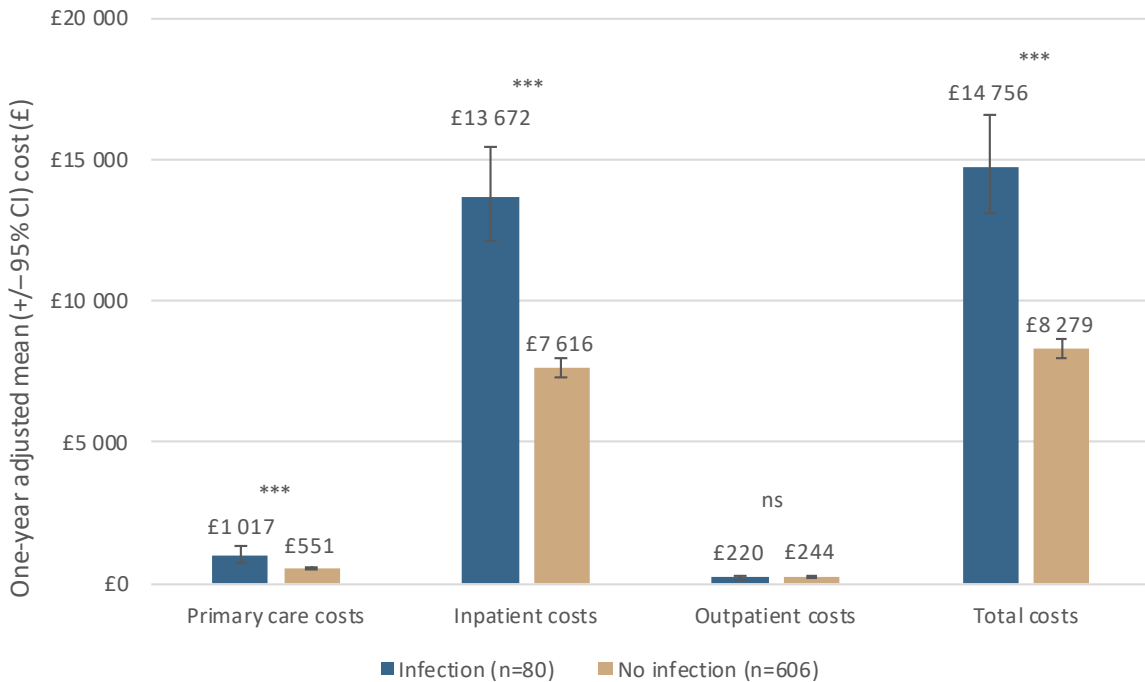

For peer review only - <http://bmjopen.bmj.com/site/about/guidelines.xhtml>

1  
2  
3  
4  
5  
6  
7  
8  
9  
10  
11  
12  
13  
14  
15  
16  
17  
18  
19  
20  
21  
22  
23  
24  
25



1  
2  
3  
4  
5  
6  
7  
8  
9  
10  
11  
12  
13  
14  
15  
16  
17  
18  
19  
20  
21  
22  
23  
24  
25  
26  
27  
28  
29  
30  
31  
32  
33  
34  
35  
36  
37  
38  
39  
40  
41  
42  
43  
44  
45  
46  
47  
48  
49  
50  
51  
52  
53  
54  
55  
56  
57  
58  
59  
60

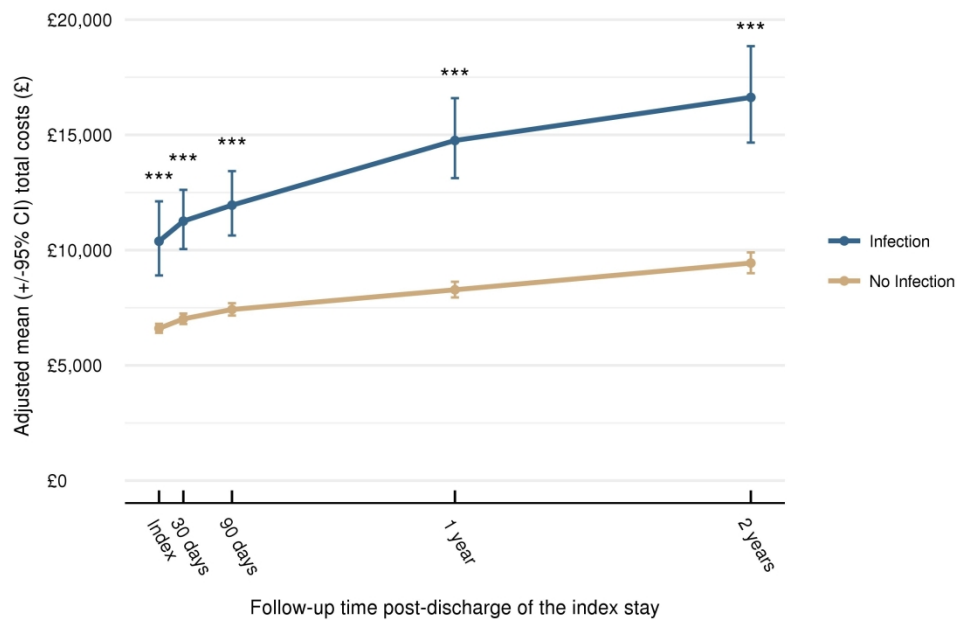

Abbreviations: CI, confidence interval. \*\*\* p<0.001. Data plotted are means +/- 95% CI.

152x101mm (600 x 600 DPI)

Figure 5A

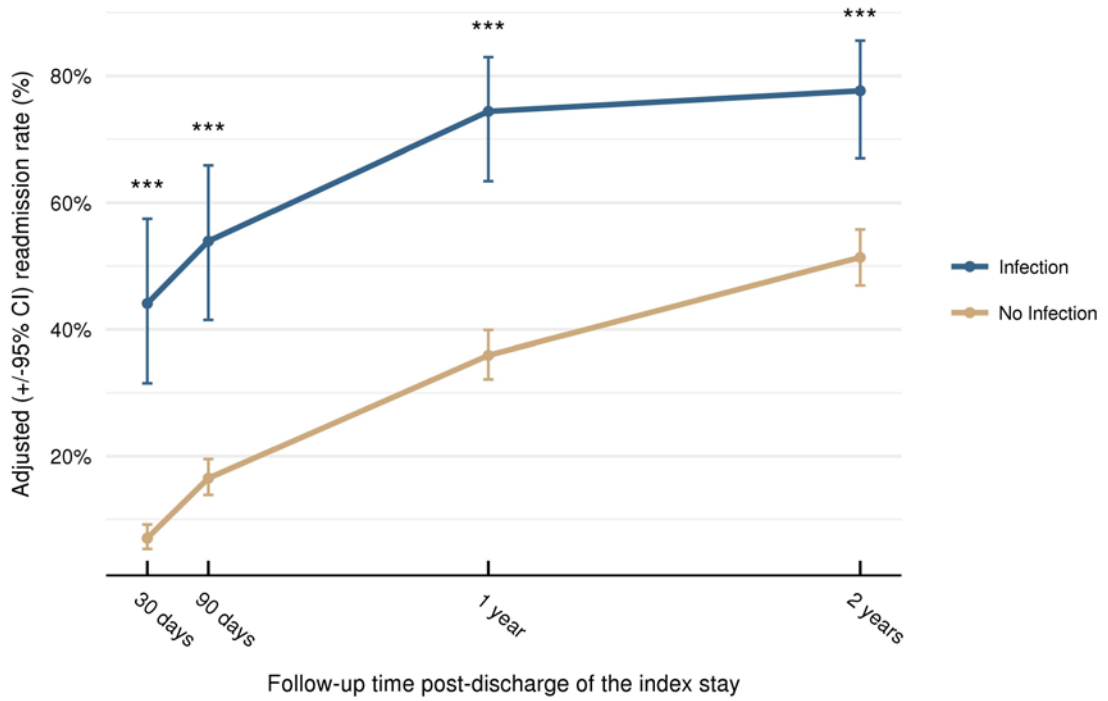

Figure 5B

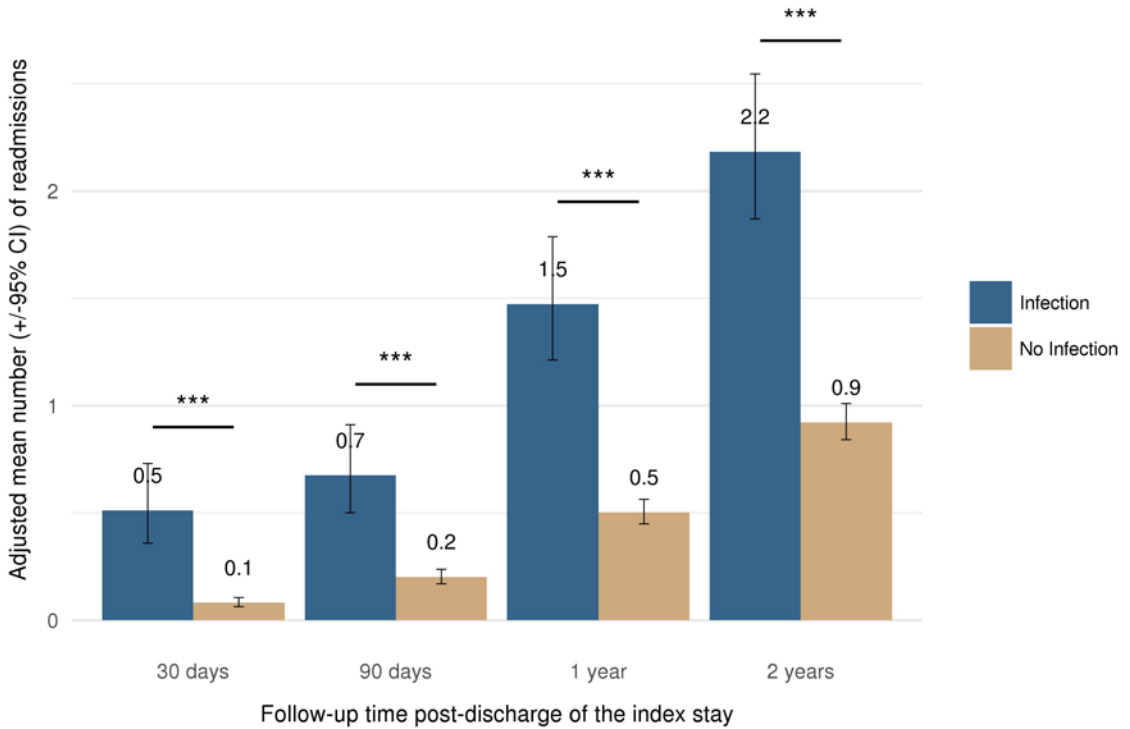

Figure 6A

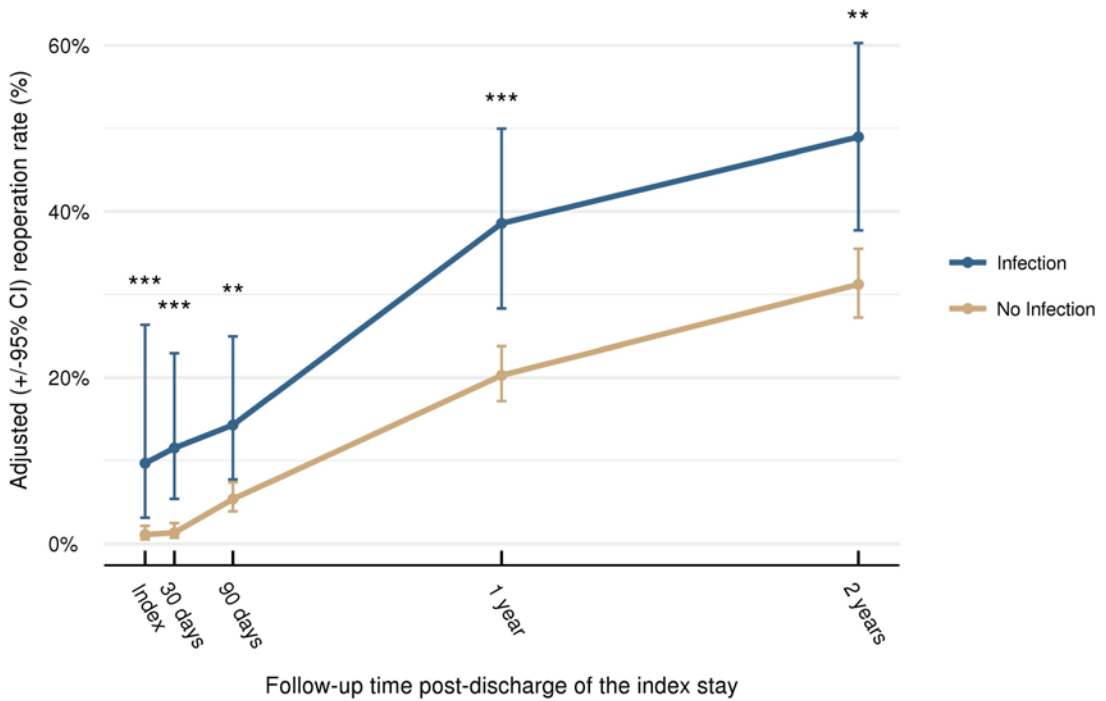

Figure 6B

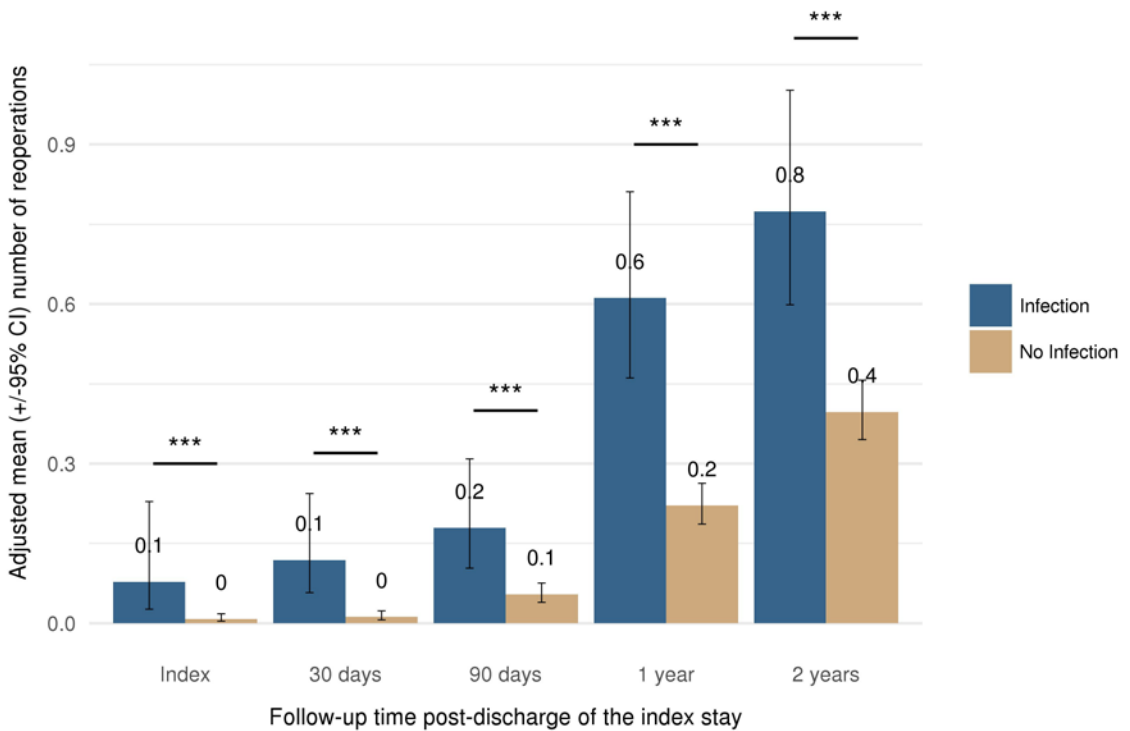

## Additional file 1: Study protocol

# PROTOCOL INFORMATION REQUIRED

The following sections below **must** be included in the CPRD ISAC research protocol. Please refer to the guidance on 'Contents of CPRD ISAC Research Protocols' ([www.cprd.com/isac](http://www.cprd.com/isac)) for more information on how to complete the sections below. Pages should be numbered. All abbreviations must be defined on first use.

**Applicants must complete all sections listed below**  
**Sections which do not apply should be completed as 'Not Applicable'**

### A. Study Title<sup>§</sup>

<sup>§</sup>Please note: This information will be published on CPRD's website as part of its transparency policy

Healthcare Resource Utilization and Costs among Patients with and without Infection after Intramedullary Nailing for A Tibial Shaft Fracture

### B. Lay Summary (Max. 200 words)<sup>§</sup>

<sup>§</sup>Please note: This information will be published on CPRD's website as part of its transparency policy

Tibial shaft fractures are the most common long bone fracture of the lower limbs. Intramedullary nailing is the most frequent surgical treatment for tibial shaft fractures. In patients with tibial shaft fractures, infection is an important complication as about 15% of these fractures are open injuries. Such infections may lead to devastating consequences such as increase in length of hospital stay, readmissions, prolonged medication treatment and reoperations along with high use of medical resources and costs. However, the healthcare burden among patients developing an infection in tibial shaft fracture is not well documented. Consequently, this study seeks to understand the impact of infection after intramedullary nailing in patients with tibial shaft fractures on healthcare use and cost of care.

### C. Technical Summary (Max. 200 words)<sup>§</sup>

<sup>§</sup>Please note: This information will be published on CPRD's website as part of its transparency policy

The objective of this retrospective longitudinal cohort study is primarily designed to determine short (30-day, 90-day) and mid-term (one-year, two-year) healthcare resource utilization (HRU) and costs among patients with deep and superficial infections versus those without following intramedullary nailing for a tibial shaft fracture. Patients with tibial shaft fracture treated with intramedullary nailing between 2011 and 2016 will be selected. The main exposure variable will include deep infection versus superficial surgical site infection or no infection. Analyses will be both descriptive and comparative using multivariable models. The multivariable models will include generalized linear models (GLMs) based on the outcome variable of interest for HRU and costs and will adjust for patient characteristics.

1  
2  
3  
4  
5  
6  
7  
8  
9  
10  
11  
12  
13  
14  
15  
16  
17  
18  
19  
20  
21  
22  
23  
24  
25  
26  
27  
28  
29  
30  
31  
32  
33  
34  
35  
36  
37  
38  
39  
40  
41  
42  
43  
44  
45  
46  
47  
48  
49  
50  
51  
52  
53  
54  
55  
56  
57  
58  
59  
60

**Applicants must complete all sections listed below**  
**Sections which do not apply should be completed as 'Not Applicable'**

#### **D. Objectives, Specific Aims and Rationale**

##### Broad Research Objectives

To evaluate the impact of developing infection in patients with intramedullary nailing for tibial shaft fractures on healthcare utilization and cost of care.

##### Specific Aims

1. To determine short (30-day, 90-day) and mid-term (one-year, two-year) Costs and HRU among patients with deep infection and superficial infections versus patients without an infection following tibial shaft fracture treated with nailing.

##### Rationale

This study seeks to understand the impact of post-surgical infection in patients with intramedullary nailing for tibial shaft fractures on cost of care and healthcare utilization.

#### **E. Study Background**

Infections remains a feared complication in orthopaedic and trauma surgery due to its potentially devastating consequences for patients. It has also been associated with an increase in medical resource utilization and treatment costs due to increased length of hospital stay, readmissions, prolonged pharmacological treatment and reoperations.<sup>1-6</sup> Deep infections defined as infections involving deeper tissues such as muscular fascia and bone<sup>7</sup> have been associated with a significant economic burden for healthcare systems. Data from long bone fracture reduction, hip replacement or hemiarthroplasty or screw fixation for proximal humeral fractures and knee arthroplasty, consistently reported 2-3 times higher treatment costs for patients that developed an infection compared to those that did not.<sup>1-6</sup>

Tibial shaft fractures are the most common long bone fracture of the lower limbs.<sup>8</sup> In patients with tibial shaft fractures, infection is an important complication as about 15% of these fractures are open injuries. Infection may lead to prolonged treatment, compromised clinical outcomes and in some cases, even limb amputation.<sup>9-12</sup> In the European setting there is limited data available with respect to the actual cost of treatment. In a Danish study on patients with open tibia fractures treated with a free flap, the presence of an infection increased the mean length of hospital stay from 28 to 63.8 days and the mean treatment costs from €49,301 to €67,958 for infected compared to uninfected fractures.<sup>13</sup> A study from the UK reported the mean length of stay and treatment costs of patients with tibial osteomyelitis. For patients treated with limb salvage procedures alone, length of stay was 15 days (10-27) and corresponding treatment costs were €16,718 while for patients, whose treatment ended up in amputation length of stay was 13 days (8-17) and treatment costs were €8,441.<sup>14</sup>

Intramedullary nailing is the preferred surgical treatment in patients with tibial shaft fractures. The impact of the development of an infection on short and mid-term post-operative medical resource utilization is not well documented. While literature from clinical trials provides some insight into infection incidence rates, the treatment pathway and treatment success/failure rates, there is a lack of detailed patient-level information particularly in relation to the actual costs of care.

**Applicants must complete all sections listed below**  
**Sections which do not apply should be completed as 'Not Applicable'**

**F. Study Type**

Hypothesis generating

This study will generate the hypothesis for HRU and costs between patients with (deep and superficial) and without infection after intramedullary nailing for tibial shaft fractures

**G. Study Design**

This is a retrospective cohort study with a longitudinal follow-up for up to two years post intramedullary nailing for tibial shaft fractures.

**H. Feasibility counts**

Based on the preliminary feasibility study of Hospital Episode Statistics (HES) inpatient data for research grade patients with complete data, we identified a total of 11,329 patients with intramedullary nailing for a tibial shaft fracture between 2011 and 2013 of which 509 patients had an infection following intramedullary nailing for a tibial shaft fracture.

**I. Sample size considerations**

No prior real-world studies have been conducted to evaluate the health care resource use and costs of interest among patients with and without infection following intramedullary nailing for tibial shaft fracture. Therefore, it is not possible to estimate the sample size

**J. Data Linkage Required (if applicable):<sup>§</sup>**

<sup>§</sup>Please note that the data linkage/s requested in research protocols will be published by the CPRD as part of its transparency policy

The Clinical Practice Research Datalink (CPRD) with HES is required to identify the patients and outcomes that are based on diagnosis and procedures recorded in the inpatient setting.

**K. Study population**

Patients initially selected for tibial shaft fracture (ICD-10, S822) must meet all the following inclusion criteria:

1. Procedure for intramedullary nailing for tibial shaft fracture (appendix) between January 1, 2011 and February 30, 2016
  - Date of first intramedullary nailing for tibial shaft fracture between January 2011 and February 2016 will be the index date
2. Research grade patients with complete medical records for at least 12 months pre- and 30- day post index date. Patients with 90-day, 1- and 2- year follow-up or continuous enrollment will be further analysed.

**Patients with the following criteria were excluded:**

1. Records for intramedullary nailing for tibial shaft fracture during the 12-month pre-index period
2. Records for treatment with internal fixation (appendix) during the 12-month pre-index period

**Applicants must complete all sections listed below**  
**Sections which do not apply should be completed as 'Not Applicable'**

3. Records for treatment with external fixation (appendix) from 12-month pre-index to 6 weeks pre-index. Records for external fixation during 6 weeks pre-index will be included as external fixation is often performed prior to intramedullary nailing.
4. Records for severe multiple injuries to different parts of the body (polytrauma) (appendix) in the 12-month pre-index period.
5. Records for a fracture in neoplastic disease (appendix) in the 12-month pre-index period.

**L. Selection of comparison group(s) or controls**

Patients not developing an infection anytime during the study period will be selected as the control group.

**M. Exposures, Health Outcomes<sup>s</sup> and Covariates**

<sup>s</sup>Please note: Summary information on health outcomes (as included on the ISAC application form above) will be published on CPRD's website as part of its transparency policy

Exposure

Patients developing infection during the 12-month post index period.

Outcome(s)

Primary Outcome

One- year inpatient costs

Secondary Outcomes

- Number of hospital readmissions (in 30-days, 90-days, 1 year and 2 years)
- Percent (yes/no) of patients with readmissions (in 30-days, 90-days, 1 year and 2 years)
- Total cost of care at the different time points (in 30-days, 90-days, 1 year and 2 years)
  - a. Inpatient admissions
  - b. Outpatient costs
  - c. Pharmacy

Costs will be expressed in UK pounds and adjusted for inflation to 2015 index. Healthcare costs will be obtained from the Personal Social Services Research Unit (PSSRU) 2015 Cost of Care public document and Healthcare Resource Group (HRG) codes available in HES. Drug costs will be obtained from British National Formulary 71 (March 2016-September 2016).

- Number of procedures for introduction of therapeutic substance (Appendix) (30-days, 90-days, 1 year and 2 years)
- Number of outpatient visits (all-cause) at the different time points (in 30-days, 90-days, 1 year and 2 years)
- Number of diagnostic tests and imaging (all-cause) at the different time points (in 30-days, 90-days, 1 year and 2 years)
- Number of days in ICU (all-cause) at the different time points (in 30-days, 90-days, 1 year and 2 years)
- Time of infection and type of infection (bacterial vs other )

**Applicants must complete all sections listed below**  
**Sections which do not apply should be completed as 'Not Applicable'**

- Percent (yes/no) of patients with use of antibiotics at the different time points (in 30-days, 90-days, 1 year and 2 years)
- Patients necessitated amputation (Appendix) at the different time points (in 30-days, 90-days, 1 year and 2 years)

#### Covariates

The covariates information will be captured during 12-month pre-index period and will include the following:

##### *Patient Demographics*

- Age
- Gender
- Smoking status

##### *Procedural Characteristics*

- Year of the index date

##### *Patient Clinical Characteristics*

#### Comorbidities (Appendix)

- Diabetes
- Dyspnea
- Ventilator requirement
- Chronic obstructive pulmonary disease (COPD)
- Congestive heart failure (CHF)
- Renal failure
- Hypertension

#### Indices

- Charlson comorbidity index (CCI) - The CCI is an aggregate measure of comorbidity created by using select diagnoses associated with chronic disease (e.g., heart disease, cancer). The CCI includes 17 medical conditions and weights these conditions from +1 to +6.

#### Medications

- Anti-hypertensive medications
- Opioids

### **N. Data/ Statistical Analysis**

All study variables will be analyzed descriptively. Frequency counts and proportions will be provided for dichotomous and polychotomous variables. Means, medians, and standard deviations will be provided for continuous variables. Time to infection will be depicted graphically using Kaplan-Meier curve.

Unadjusted comparisons of patient demographics, comorbidities and medication use between groups (with and without infection) will be performed with 2-sample t-tests for continuous variables and  $\chi^2$  tests for categorical variables and Wilcoxon rank sum tests for cost variables.



**Applicants must complete all sections listed below**  
**Sections which do not apply should be completed as 'Not Applicable'**

A sub-analysis will be conducted in which patients will be stratified by an open fracture and a closed tibial shaft fracture (appendix) to determine the outcomes.

All analyses will be conducted using SAS for Windows. Statistical significance will be set a-priori at  $p < 0.05$  (two-sided).

In addition, a generalized Linear Model (GLM) will be utilized to get adjusted results after control for confounding. Details of this methods are mentioned in the section below:

**O. Plan for addressing confounding**

Multivariable models will be constructed to examine the impact of infection versus no infection and other patient characteristics for healthcare utilization and cost outcomes. A Generalized Linear Model (GLM) will be utilized and the appropriate error distribution and link function will be used based on the outcome variable of interest for utilization and costs.

Following standard procedures, for each model regression diagnostics will be performed to assess goodness of fit and violations of model assumptions. Appropriate modifications will be made as needed either through selection of alternative error distributions or link functions, or through transformations of either the independent or dependent variables. We will also examine the fitted and the observed data to uncover outliers, their effect on the analysis, and possible misspecification of the initial equation.

**P. Plans for addressing missing data**

Missing data will not be imputed for the analyses. Most variables (drugs, procedures, diagnosis) can have no missing values, as they are assumed not to have occurred unless a record is identified. To be included in the study, patients will need to have complete medical history for at least 12 months pre-index to 12 months post-index date.

**Q. Patient or user group involvement (if applicable)**

This is purely an observational study using CPRD with HES linkage data. This study does not involve requesting additional information from GPs. Also, the study does not require contacting patients to get any additional information.

**R. Plans for disseminating and communicating study results, including the presence or absence of any restrictions on the extent and timing of publication**

The study will be disseminated per the ICMJE guidelines. We plan on submitting the results to a peer-reviewed journal and presenting the results at scientific conferences.

**S. Limitations of the study design, data sources, and analytic methods**

**Applicants must complete all sections listed below**  
**Sections which do not apply should be completed as 'Not Applicable'**

- Potential bias in patient population: only patients with complete medical history for 12 months post index will be included, thus excluding very severe patients with less than 12 month life expectancy
- Coding errors and misclassifications
- Under-reported or missing diagnoses, based on patients' choice (not to seek care) or access challenges
- Identify pharmacy cost in terms of medication prescribed in the primary care setting only
- Cost evaluated using PSSRU, HRG and BNF codes as the costs are not directly available in the data

**T. References**

1. de Lissovoy G, Fraeman K, Hutchins V, et al. Surgical site infection: incidence and impact on hospital utilization and treatment costs. *American journal of infection control* 2009;**37**(5):387-97.
2. Jenks PJ, Laurent M, McQuarry S, et al. Clinical and economic burden of surgical site infection (SSI) and predicted financial consequences of elimination of SSI from an English hospital. *The Journal of hospital infection* 2014;**86**(1):24-33.
3. Pollard TC, Newman JE, Barlow NJ, et al. Deep wound infection after proximal femoral fracture: consequences and costs. *The Journal of hospital infection* 2006;**63**(2):133-9.
4. Schmidt A, Benard S, Cyr S. Hospital Cost of Staphylococcal Infection after Cardiothoracic or Orthopedic Operations in France: A Retrospective Database Analysis. *Surgical infections* 2015;**16**(4):428-35.
5. Thakore RV, Greenberg SE, Shi H, et al. Surgical site infection in orthopedic trauma: A case-control study evaluating risk factors and cost. *Journal of clinical orthopaedics and trauma* 2015;**6**(4):220-6.
6. Wijeratna MD, McRoberts J, Porteous MJ. Cost of infection after surgery for intracapsular fracture of the femoral neck. *Annals of the Royal College of Surgeons of England* 2015;**97**(4):283-6.
7. Metsemakers WJ, Handojo K, Reynders P, et al. Individual risk factors for deep infection and compromised fracture healing after intramedullary nailing of tibial shaft fractures: a single centre experience of 480 patients. *Injury* 2015;**46**(4):740-5.
8. Minhas SV, Ho BS, Switaj PJ, et al. A comparison of 30-day complications following plate fixation versus intramedullary nailing of closed extra-articular tibia fractures. *Injury* 2015;**46**(4):734-9.
9. Buckley RE, Colton C. Infection. *Secondary Infection* 2012.  
[https://www2.aofoundation.org/wps/portal/surgery?showPage=redfix&bone=Tibia&segment=Shaft&classification=42-Special%20considerations&treatment=&method=Special%20considerations&implantstype=Complications&approach=&redfix\\_url=1341319024234](https://www2.aofoundation.org/wps/portal/surgery?showPage=redfix&bone=Tibia&segment=Shaft&classification=42-Special%20considerations&treatment=&method=Special%20considerations&implantstype=Complications&approach=&redfix_url=1341319024234).
10. Hannigan GD, Pulos N, Grice EA, et al. Current Concepts and Ongoing Research in the Prevention and Treatment of Open Fracture Infections. *Advances in wound care* 2015;**4**(1):59-74.
11. Kanakaris NK, Tosounidis TH, Giannoudis PV. Surgical management of infected non-unions: An update. *Injury* 2015;**46 Suppl 5**:S25-32.
12. Mouzopoulos G, Kanakaris NK, Kontakis G, et al. Management of bone infections in adults: the surgeon's and microbiologist's perspectives. *Injury* 2011;**42 Suppl 5**:S18-23.
13. The cost of infection in severe open tibial fractures treated with a free flap. 34th Annual Meeting of the European Bone & Joint Infection Society; 2015; Lisbon, Portugal.
14. Kendall J, Jones, S., McNally, M. Income and costs of treating tibial osteomyelitis in the uk – a comparison of limb salvage versus amputation. 34th Annual Meeting of the European Bone & Joint Infection Society. Lisbon, Portugal, 2015.

**List of Appendices** (Submit all appendices as separate documents to this application)

**Applicants must complete all sections listed below**  
**Sections which do not apply should be completed as 'Not Applicable'**

- Appendix 1: OPCS-4 codes to identify intramedullary nailing for long bones  
 Appendix 2 OPCS-4 codes to identify internal fixation  
 Appendix 3 OPCS-4 codes to identify external fixation  
 Appendix 4: ICD-10 codes to identify severe multiple injuries  
 Appendix 5: Read codes to identify fracture due to neoplastic disease  
 Appendix 6: ICD-10, OPCS and Read codes to identify infection  
 Appendix 7: OPCS-4 codes to identify procedures for introduction of therapeutic substance  
 Appendix 8: OPCS-4 codes to identify procedures amputation of tibia bone  
 Appendix 9: Read codes to identify diabetes mellitus with and without complications  
 Appendix 10: Read codes to identify dyspnoea  
 Appendix 11: Read codes to identify ventilator requirement  
 Appendix 12: Read codes to identify COPD  
 Appendix 13: Read codes to identify heart failure  
 Appendix 14: Read codes to identify renal failure  
 Appendix 15: Read codes to identify hypertension  
 Appendix 16: Read, ICD-10 and OPCS codes to identify open and closed tibial shaft fracture  
 Appendix 17: Read codes to identify Charlson comorbidity index  
 Appendix 18: OPCS codes to identify reoperations

1. OPCS-4 codes to identify intramedullary nailing for long bones

| OPCS-4 | Description                                                                       |
|--------|-----------------------------------------------------------------------------------|
| W192   | Primary open reduction of fracture of long bone and fixation using rigid nail NEC |
| W242   | Closed reduction of fracture of long bone and rigid internal fixation NEC         |

2. OPCS-4 codes to identify internal fixation

| OPCS-4 | Description                                                                            |
|--------|----------------------------------------------------------------------------------------|
| O172   | Remanipulation of fracture of long bone and rigid internal fixation NEC                |
| O173   | Remanipulation of fracture of long bone and flexible internal fixation HFQ             |
| O175   | Remanipulation of fragment of bone and fixation using screw                            |
| O178   | Other specified secondary closed reduction of fracture of bone and internal fixation   |
| O179   | Unspecified secondary closed reduction of fracture of bone and internal fixation       |
| W195   | Primary open reduction of fragment of bone and fixation using screw                    |
| W196   | Primary open reduction of fragment of bone and fixation using wire system              |
| W198   | Other specified primary open reduction of fracture of bone and intramedullary fixation |
| W199   | Unspecified primary open reduction of fracture of bone and intramedullary fixation     |

| OPCS-4 | Description                                                                                 |
|--------|---------------------------------------------------------------------------------------------|
| W201   | Primary open reduction of fracture of long bone and extramedullary fixation using plate NEC |
| W202   | Primary open reduction of fracture of long bone and extramedullary fixation using cerclage  |
| W203   | Primary open reduction of fracture of long bone and extramedullary fixation using suture    |
| W204   | Primary open reduction of fracture of long bone and complex extramedullary fixation NEC     |
| W208   | Other specified primary open reduction of fracture of bone and extramedullary fixation      |
| W209   | Unspecified primary open reduction of fracture of bone and extramedullary fixation          |
| W231   | Secondary open reduction of fracture of bone and intramedullary fixation HFQ                |
| W232   | Secondary open reduction of fracture of bone and extramedullary fixation HFQ                |
| W236   | Secondary open reduction of fracture of bone and internal fixation HFQ                      |
| W248   | Other specified closed reduction of fracture of bone and internal fixation                  |
| W249   | Unspecified closed reduction of fracture of bone and internal fixation                      |
| W281   | Application of internal fixation to bone NEC                                                |
| W282   | Adjustment to internal fixation of bone NEC                                                 |
| W283   | Removal of internal fixation from bone NEC                                                  |
| W288   | Other specified other internal fixation of bone                                             |
| W289   | Unspecified other internal fixation of bone                                                 |

### 3. OPCS-4 codes to identify external fixation

| OPCS-4 | Description                                                                       |
|--------|-----------------------------------------------------------------------------------|
| W222   | Primary open reduction of fracture of bone and external fixation HFQ              |
| W235   | Secondary open reduction of fracture of bone and external fixation HFQ            |
| W252   | Closed reduction of fracture of bone and fixation using functional bracing system |
| W253   | Remanipulation of fracture of bone and external fixation HFQ                      |
| W258   | Other specified closed reduction of fracture of bone and external fixation        |
| W259   | Unspecified closed reduction of fracture of bone and external fixation            |
| W301   | Application of external fixation to bone NEC                                      |
| W302   | Adjustment to external fixation of bone NEC                                       |
| W303   | Removal of external fixation from bone NEC                                        |
| W304   | Application of external ring fixation to bone NEC                                 |
| W308   | Other specified other external fixation of bone                                   |
| W309   | Unspecified other external fixation of bone                                       |

## 4. ICD-10 codes to identify severe multiple injuries

| ICD-10 codes | Description                                                  |
|--------------|--------------------------------------------------------------|
| S097         | Multiple injuries of head                                    |
| S197         | Multiple injuries of neck                                    |
| S277         | Multiple injuries of intrathoracic organs                    |
| S297         | Multiple injuries of thorax                                  |
| S397         | Other multiple injuries of abdomen, lower back and pelvis    |
| S497         | Multiple injuries of shoulder and upper arm                  |
| S597         | Multiple injuries of forearm                                 |
| S647         | Injury of multiple nerves at wrist and hand level            |
| S697         | Multiple injuries of wrist and hand                          |
| S797         | Multiple injuries of hip and thigh                           |
| S897         | Multiple injuries of lower leg                               |
| S997         | Multiple injuries of ankle and foot                          |
| T042         | Crushing injuries involving multiple region of upper limb(s) |
| T043         | Crushing injuries involving multiple region of lower limb(s) |
| T062         | Injuries of nerves involving multiple body regions           |
| T063         | Injuries of blood vessels involving multiple body regions    |
| T068         | Other specified injuries involving multiple body regions     |
| T07X         | Unspecified multiple injuries                                |

## 5. Read codes to identify fracture due to neoplastic disease

| Medcode | Read_code | Description                            |
|---------|-----------|----------------------------------------|
| 54834   | N331700   | Fracture of bone in neoplastic disease |

## 6. ICD-10, OPCS and Read codes to identify infection

| ICD-10 codes | Description                                                  | Deep/Superficial |
|--------------|--------------------------------------------------------------|------------------|
| A498         | Other bacterial infections of unspecified site               | Deep             |
| A499         | Bacterial infection, unspecified                             | Deep             |
| A544         | Gonococcal infection of musculoskeletal system               | Deep             |
| L088         | Other spec local infections of skin and subcutaneous tissue  | Superficial      |
| L089         | Local infection of skin and subcutaneous tissue, unspecified | Superficial      |
| T814         | Infection following a procedure, not elsewhere classified    | Deep             |

| Medcode | Read_code | Description                                                  | Deep/Superficial |
|---------|-----------|--------------------------------------------------------------|------------------|
| 3128    | M07z.00   | Local infection skin/subcut tissue NOS                       | Superficial      |
| 6956    | SK03.00   | Post-traumatic wound infection NEC                           | Deep             |
| 7155    | N302.11   | Bone infection                                               | Deep             |
| 51854   | SP25600   | Postoperative wound infection-deep                           | Deep             |
| 20342   | N30..00   | Osteomyelitis, periostitis, other infections affecting bone  | Deep             |
| 21073   | M07y.00   | Local infection of skin or subcutaneous tissue OS            | Superficial      |
| 25363   | SP06800   | Infection and inflamm reac due inter ortho device            | Deep             |
| 40293   | SP06.00   | Infection and inflammation due to internal prosthetic device | Deep             |
| 30381   | SP05612   | [X]Prosthetic infection                                      | Deep             |
| 33381   | A3Byz00   | Other specified bacterial infection NOS                      | Superficial      |
| 43058   | N30z.00   | Bone infection NOS                                           | Deep             |
| 39830   | N300.12   | Acute bone infection                                         | Deep             |
| 40293   | SP06.00   | Infection and inflammation due to internal prosthetic device | Deep             |
| 52122   | Myu0.00   | [X]Infections of the skin and subcutaneous tissue            | Superficial      |
| 69280   | N30z600   | Bone infection NOS, of the lower leg                         | Deep             |
| 69855   | N30y600   | Other infections involving bone, of the lower leg            | Deep             |
| 4207    | M03z000   | Cellulitis NOS                                               | Superficial      |

| OPCS-4 | Description                          | Deep/Superficial |
|--------|--------------------------------------|------------------|
| S571   | Debridement of skin NEC              | Superficial      |
| W332   | Debridement of open fracture of bone | Deep             |
| T963   | Debridement of soft tissue NEC       | Deep             |
| W336   | Debridement of bone NEC              | Deep             |

7. OPCS-4 codes to identify procedures for debridement or introduction of therapeutic substance

| OPCS-4 | Description                          |
|--------|--------------------------------------|
| S571   | Debridement of skin NEC              |
| W332   | Debridement of open fracture of bone |
| T963   | Debridement of soft tissue NEC       |

|      |                                                                 |
|------|-----------------------------------------------------------------|
| W336 | Debridement of bone NEC                                         |
| W283 | Removal of internal fixation from bone NEC                      |
| X292 | Continuous intravenous infusion of therapeutic substance NEC    |
| S523 | Insertion of therapeutic substance into subcutaneous tissue NEC |
| W351 | Introduction of therapeutic substance into bone                 |

8. OPCS-4 codes to identify procedures amputation of tibia bone

| OPCS-4 | Description                       |
|--------|-----------------------------------|
| X094   | Amputation of leg through knee    |
| X095   | Amputation of leg below knee      |
| X098   | Other specified amputation of leg |
| X099   | Unspecified amputation of leg     |

9. Read codes to identify diabetes mellitus with and without complications

| Medcodes | Read code | Description                                                  |
|----------|-----------|--------------------------------------------------------------|
| 231370   | 66AJ.11   | Unstable diabetes                                            |
| 297735   | C108600   | Insulin dependent diabetes mellitus with gangrene            |
| 288454   | C101100   | Diabetes mellitus, adult onset, with ketoacidosis            |
| 344495   | C10M.00   | Lipoatrophic diabetes mellitus                               |
| 224500   | C103000   | Diabetes mellitus, juvenile type, with ketoacidotic coma     |
| 233608   | C109500   | Non-insulin dependent diabetes mellitus with gangrene        |
| 251808   | C109900   | Non-insulin-dependent diabetes mellitus without complication |
| 331810   | C109412   | Type 2 diabetes mellitus with ulcer                          |
| 344028   | C10FG00   | Type 2 diabetes mellitus with arthropathy                    |
| 279344   | C109.11   | NIDDM - Non-insulin dependent diabetes mellitus              |
| 343531   | C109G11   | Type II diabetes mellitus with arthropathy                   |
| 279348   | C10z.00   | Diabetes mellitus with unspecified complication              |
| 342740   | C10EM11   | Type I diabetes mellitus with ketoacidosis                   |
| 279343   | C107200   | Diabetes mellitus, adult with gangrene                       |
| 210870   | 250 GA    | Gangrene diabetic                                            |
| 339961   | C10FJ00   | Insulin treated Type 2 diabetes mellitus                     |
| 308067   | C108911   | Type I diabetes mellitus maturity onset                      |
| 297727   | C102z00   | Diabetes mellitus NOS with hyperosmolar coma                 |
| 283820   | 250 HC    | Hypoglycaemic Coma Diabetic                                  |
| 303253   | 250 AK    | Maturity Onset Diabetes Mellitus Insulin                     |
| 243302   | G73y000   | Diabetic Peripheral Angiopathy                               |

| Medcodes | Read code | Description                                                 |
|----------|-----------|-------------------------------------------------------------|
| 306131   | 250 E     | Hypoglycaemia In Diabetes Mellitus                          |
| 249566   | 66AJ.00   | Diabetic - Poor Control                                     |
| 331925   | C109J12   | Insulin treated Type II diabetes mellitus                   |
| 309010   | C109F12   | Type 2 diabetes mellitus with peripheral angiopathy         |
| 242649   | C109300   | Non-insulin-dependent diabetes mellitus with multiple comps |
| 242646   | C108400   | Unstable insulin dependent diabetes mellitus                |
| 340367   | C10F900   | Type 2 diabetes mellitus without complication               |
| 206461   | C10y.00   | Diabetes mellitus with other specified manifestation        |
| 344412   | C10F.11   | Type II diabetes mellitus                                   |
| 341116   | C10FL00   | Type 2 diabetes mellitus with persistent proteinuria        |
| 306134   | 250 NT    | UNSTABLE DIABETIC                                           |
| 309704   | C109G00   | Non-insulin dependent diabetes mellitus with arthropathy    |
| 343565   | C109G12   | Type 2 diabetes mellitus with arthropathy                   |
| 249564   | 66A5.00   | Diabetic on insulin                                         |
| 308094   | C109511   | Type II diabetes mellitus with gangrene                     |
| 243795   | L180600   | Pre-existing diabetes mellitus, non-insulin-dependent       |
| 256384   | 250 PR    | Pruritus Diabetic                                           |
| 341003   | C10FN00   | Type 2 diabetes mellitus with ketoacidosis                  |
| 341356   | C10E400   | Unstable type 1 diabetes mellitus                           |
| 270277   | C10zy00   | Other specified diabetes mellitus with unspecified comps    |
| 341680   | C10D.00   | Diabetes mellitus autosomal dominant type 2                 |
| 288459   | C107z00   | Diabetes mellitus NOS with peripheral circulatory disorder  |
| 341002   | C10EN00   | Type 1 diabetes mellitus with ketoacidotic coma             |
| 303258   | 250 CT    | Diabetic Cataract                                           |
| 215438   | C101000   | Diabetes mellitus, juvenile type, with ketoacidosis         |
| 206451   | C100011   | Insulin dependent diabetes mellitus                         |
| 229069   | 250 JA    | Diabetic Acidosis                                           |
| 309863   | C108411   | Unstable type I diabetes mellitus                           |
| 303250   | 250 A     | Sugar Diabetes                                              |
| 206452   | C103.00   | Diabetes mellitus with ketoacidotic coma                    |
| 261004   | C107.11   | Diabetes mellitus with gangrene                             |
| 303263   | 250 JL    | Ketosis Diabetic                                            |
| 303256   | 250 AN    | Diabetes                                                    |
| 341598   | C10E500   | Type 1 diabetes mellitus with ulcer                         |



| Medcodes | Read code | Description                                                |
|----------|-----------|------------------------------------------------------------|
| 242650   | C109400   | Non-insulin dependent diabetes mellitus with ulcer         |
| 297739   | C10yy00   | Other specified diabetes mellitus with other spec comps    |
| 292948   | 250 AB    | Abscess Diabetic                                           |
| 307957   | C109711   | Type II diabetes mellitus - poor control                   |
| 261009   | C10A000   | Malnutrition-related diabetes mellitus with coma           |
| 339633   | C10F.00   | Type 2 diabetes mellitus                                   |
| 309658   | C109J11   | Insulin treated non-insulin dependent diabetes mellitus    |
| 223592   | 8A13.00   | Diabetic stabilisation                                     |
| 233607   | C108.00   | Insulin dependent diabetes mellitus                        |
| 347683   | C10EG00   | Type 1 diabetes mellitus with peripheral angiopathy        |
| 340865   | C108E12   | Type 1 diabetes mellitus with hypoglycaemic coma           |
| 302787   | C108.13   | Type I diabetes mellitus                                   |
| 270271   | C107100   | Diabetes mellitus, adult, peripheral circulatory disorder  |
| 233609   | C10A100   | Malnutrition-related diabetes mellitus with ketoacidosis   |
| 261001   | C102000   | Diabetes mellitus, juvenile type, with hyperosmolar coma   |
| 237987   | 250 AT    | Diabetic Amyotrophy                                        |
| 308119   | C109411   | Type II diabetes mellitus with ulcer                       |
| 341509   | C10F500   | Type 2 diabetes mellitus with gangrene                     |
| 303262   | 250 JK    | Ketoacidosis Diabetic                                      |
| 297726   | C102100   | Diabetes mellitus, adult onset, with hyperosmolar coma     |
| 308004   | C108E11   | Type I diabetes mellitus with hypoglycaemic coma           |
| 339527   | C109K00   | Hyperosmolar non-ketotic state in type 2 diabetes mellitus |
| 247153   | 250 G     | Ulcer Diabetic                                             |
| 258769   | 66AJz00   | Diabetic - poor control NOS                                |
| 347258   | C10FJ11   | Insulin treated Type II diabetes mellitus                  |
| 297734   | C108500   | Insulin dependent diabetes mellitus with ulcer             |
| 309300   | C109J00   | Insulin treated Type 2 diabetes mellitus                   |
| 341126   | C10E800   | Type 1 diabetes mellitus - poor control                    |
| 309125   | C108812   | Type 1 diabetes mellitus - poor control                    |
| 206454   | C107400   | NIDDM with peripheral circulatory disorder                 |
| 343055   | C10G.00   | Secondary pancreatic diabetes mellitus                     |
| 340580   | C10EM00   | Type 1 diabetes mellitus with ketoacidosis                 |
| 331540   | 66AV.00   | Diabetic on insulin and oral treatment                     |
| 298869   | L180500   | Pre-existing diabetes mellitus, insulin-dependent          |

| Medcodes | Read code | Description                                                 |
|----------|-----------|-------------------------------------------------------------|
| 342313   | C10FP00   | Type 2 diabetes mellitus with ketoacidotic coma             |
| 297725   | C100.00   | Diabetes mellitus with no mention of complication           |
| 344338   | C10E600   | Type 1 diabetes mellitus with gangrene                      |
| 333576   | C109D12   | Type 2 diabetes mellitus with hypoglycaemic coma            |
| 341127   | C10FF00   | Type 2 diabetes mellitus with peripheral angiopathy         |
| 261005   | C108.12   | Type 1 diabetes mellitus                                    |
| 206457   | C109.00   | Non-insulin-dependent diabetes mellitus                     |
| 331823   | C109D00   | Non-insulin dependent diabetes mellitus with hypoglyca coma |
| 242656   | C10zz00   | Diabetes mellitus NOS with unspecified complication         |
| 340814   | C10EE00   | Type 1 diabetes mellitus with hypoglycaemic coma            |
| 295382   | 66AS.00   | Diabetic annual review                                      |
| 233606   | C107000   | Diabetes mellitus, juvenile ??? circulatory disorder        |
| 347648   | C10E412   | Unstable insulin dependent diabetes mellitus                |
| 341139   | C10E900   | Type 1 diabetes mellitus maturity onset                     |
| 242642   | C101y00   | Other specified diabetes mellitus with ketoacidosis         |
| 344989   | C10FL11   | Type II diabetes mellitus with persistent proteinuria       |
| 247152   | 250 DR    | Diabetic Diarrhoea                                          |
| 283822   | 250 NH    | Hyperosmolar Diabetic State                                 |
| 303259   | 250 DC    | Dietary Control Diabetes                                    |
| 310005   | C109712   | Type 2 diabetes mellitus - poor control                     |
| 270372   | Cyu2.00   | [X]Diabetes mellitus                                        |
| 270268   | C10..00   | Diabetes mellitus                                           |
| 346131   | C10EA00   | Type 1 diabetes mellitus without complication               |
| 279341   | C100z00   | Diabetes mellitus NOS with no mention of complication       |
| 297729   | C103z00   | Diabetes mellitus NOS with ketoacidotic coma                |
| 331809   | C108G00   | Insulin dependent diab mell with peripheral angiopathy      |
| 308089   | C108E00   | Insulin dependent diabetes mellitus with hypoglycaemic coma |
| 215437   | C101.00   | Diabetes mellitus with ketoacidosis                         |
| 347882   | C10E812   | Insulin dependent diabetes mellitus - poor control          |
| 341302   | C10F700   | Type 2 diabetes mellitus - poor control                     |
| 222266   | 66AK.00   | Diabetic - cooperative patient                              |
| 270276   | C10B000   | Steroid induced diabetes mellitus without complication      |
| 233603   | C100111   | Maturity onset diabetes                                     |
| 339632   | C10E.00   | Type 1 diabetes mellitus                                    |

| Medcodes | Read code | Description                                                |
|----------|-----------|------------------------------------------------------------|
| 223655   | 8H2J.00   | Admit diabetic emergency                                   |
| 283823   | 2500AH    | Latent Diabetes                                            |
| 285267   | 1434      | H/O: diabetes mellitus                                     |
| 308820   | C108811   | Type I diabetes mellitus - poor control                    |
| 344076   | C10E.12   | Insulin dependent diabetes mellitus                        |
| 270269   | C100100   | Diabetes mellitus, adult onset, no mention of complication |
| 341357   | C10F400   | Type 2 diabetes mellitus with ulcer                        |
| 242655   | C10z100   | Diabetes mellitus, adult onset, unspecified complication   |
| 280482   | L180X00   | Pre-existing diabetes mellitus, unspecified                |
| 341557   | 8BL2.00   | Patient on maximal tolerated therapy for diabetes          |
| 242653   | C10yz00   | Diabetes mellitus NOS with other specified manifestation   |
| 288455   | C102.00   | Diabetes mellitus with hyperosmolar coma                   |
| 270275   | C10A.00   | Malnutrition-related diabetes mellitus                     |
| 270273   | C108.11   | IDDM-Insulin dependent diabetes mellitus                   |
| 215439   | C101z00   | Diabetes mellitus NOS with ketoacidosis                    |
| 342317   | C10FD00   | Type 2 diabetes mellitus with hypoglycaemic coma           |
| 261007   | C108800   | Insulin dependent diabetes mellitus - poor control         |
| 303261   | 250 HP    | Precoma Diabetic                                           |
| 341856   | C10EK00   | Type 1 diabetes mellitus with persistent proteinuria       |
| 303252   | 250 AD    | Diabetes Mellitus Insulin Dependant                        |
| 347025   | C10H.00   | Diabetes mellitus induced by non-steroid drugs             |
| 270270   | C107.00   | Diabetes mellitus with peripheral circulatory disorder     |
| 332066   | C10D.11   | Maturity onset diabetes in youth type 2                    |
| 224506   | C107300   | IDDM with peripheral circulatory disorder                  |
| 340332   | C109F11   | Type II diabetes mellitus with peripheral angiopathy       |
| 309143   | C109D11   | Type II diabetes mellitus with hypoglycaemic coma          |
| 341409   | C10EL00   | Type 1 diabetes mellitus with persistent microalbuminuria  |
| 242641   | C100112   | Non-insulin dependent diabetes mellitus                    |
| 340474   | C10FM00   | Type 2 diabetes mellitus with persistent microalbuminuria  |
| 261095   | Cyu2000   | [X]Other specified diabetes mellitus                       |
| 288460   | C109.12   | Type 2 diabetes mellitus                                   |
| 224501   | C103y00   | Other specified diabetes mellitus with coma                |
| 302788   | C109.13   | Type II diabetes mellitus                                  |
| 332948   | C108511   | Type I diabetes mellitus with ulcer                        |

| Medcodes | Read code | Description                                                  |
|----------|-----------|--------------------------------------------------------------|
| 347834   | C10EN11   | Type I diabetes mellitus with ketoacidotic coma              |
| 297738   | C109700   | Non-insulin dependent diabetes mellitus - poor control       |
| 283819   | 250 H     | Coma Diabetic                                                |
| 215444   | C10y100   | Diabetes mellitus, adult, other specified manifestation      |
| 346130   | C10E.11   | Type I diabetes mellitus                                     |
| 344745   | C10N.00   | Secondary diabetes mellitus                                  |
| 347629   | C10F711   | Type II diabetes mellitus - poor control                     |
| 277055   | 66A1.00   | Diabetic - good control                                      |
| 251805   | C100000   | Diabetes mellitus, juvenile type, no mention of complication |
| 206900   | F464000   | Diabetic cataract                                            |
| 309738   | C109212   | Type 2 diabetes mellitus with neurological complications     |
| 224502   | C104000   | Diabetes mellitus, juvenile type, with renal manifestation   |
| 345097   | C109111   | Type II diabetes mellitus with ophthalmic complications      |
| 341813   | 2BBP.00   | O/E - right eye background diabetic retinopathy              |
| 346841   | C108C11   | Type I diabetes mellitus with polyneuropathy                 |
| 308934   | C108H00   | Insulin dependent diabetes mellitus with arthropathy         |
| 215442   | C109C00   | Non-insulin dependent diabetes mellitus with nephropathy     |
| 261008   | C108B00   | Insulin dependent diabetes mellitus with mononeuropathy      |
| 297732   | C106100   | Diabetes mellitus, adult onset, neurological manifestation   |
| 206455   | C108000   | Insulin-dependent diabetes mellitus with renal complications |
| 309524   | C109H00   | Non-insulin dependent d m with neuropathic arthropathy       |
| 251806   | C108200   | Insulin-dependent diabetes mellitus with neurological comps  |
| 343081   | C10F100   | Type 2 diabetes mellitus with ophthalmic complications       |
| 341814   | 2BBQ.00   | O/E - left eye background diabetic retinopathy               |
| 309275   | C109011   | Type II diabetes mellitus with renal complications           |
| 252191   | F420200   | Preproliferative diabetic retinopathy                        |
| 288456   | C105000   | Diabetes mellitus, juvenile type, ophthalmic manifestation   |
| 347472   | C10FR00   | Type 2 diabetes mellitus with gastroparesis                  |
| 288461   | C109100   | Non-insulin-dependent diabetes mellitus with ophthalm comps  |
| 306132   | 250 F     | Neuropathy Diabetic                                          |
| 341286   | C10FE00   | Type 2 diabetes mellitus with diabetic cataract              |
| 308948   | C108712   | Type 1 diabetes mellitus with retinopathy                    |
| 242643   | C106.13   | Diabetes mellitus with polyneuropathy                        |
| 279760   | F420.00   | Diabetic retinopathy                                         |

| Medcodes | Read code | Description                                                  |
|----------|-----------|--------------------------------------------------------------|
| 308463   | C109612   | Type 2 diabetes mellitus with retinopathy                    |
| 270274   | C109B00   | Non-insulin dependent diabetes mellitus with polyneuropathy  |
| 309943   | F420600   | Non proliferative diabetic retinopathy                       |
| 288457   | C105y00   | Other specified diabetes mellitus with ophthalmic complicatn |
| 309614   | C109E11   | Type II diabetes mellitus with diabetic cataract             |
| 341801   | C10FB00   | Type 2 diabetes mellitus with polyneuropathy                 |
| 340973   | C10FA00   | Type 2 diabetes mellitus with mononeuropathy                 |
| 347417   | C10F611   | Type II diabetes mellitus with retinopathy                   |
| 343003   | C10E200   | Type 1 diabetes mellitus with neurological complications     |
| 342681   | C108B11   | Type I diabetes mellitus with mononeuropathy                 |
| 206459   | C109600   | Non-insulin-dependent diabetes mellitus with retinopathy     |
| 298103   | F381300   | Myasthenic syndrome due to diabetic amyotrophy               |
| 224505   | C106z00   | Diabetes mellitus NOS with neurological manifestation        |
| 224503   | C104y00   | Other specified diabetes mellitus with renal complications   |
| 342469   | 2BBV.00   | O/E - left eye proliferative diabetic retinopathy            |
| 332953   | C108711   | Type I diabetes mellitus with retinopathy                    |
| 279761   | F420400   | Diabetic maculopathy                                         |
| 201928   | 250 LG    | Diabetic Glomerulosclerosis                                  |
| 309628   | C109C12   | Type 2 diabetes mellitus with nephropathy                    |
| 224504   | C106.11   | Diabetic amyotrophy                                          |
| 207385   | K01x111   | Kimmelstiel - Wilson disease                                 |
| 206456   | C108D00   | Insulin dependent diabetes mellitus with nephropathy         |
| 341836   | C108212   | Type 1 diabetes mellitus with neurological complications     |
| 242645   | C108100   | Insulin-dependent diabetes mellitus with ophthalmic comps    |
| 288858   | F3y0.00   | Diabetic mononeuropathy                                      |
| 252174   | F372.12   | Diabetic neuropathy                                          |
| 234015   | F420300   | Advanced diabetic maculopathy                                |
| 347410   | C10F011   | Type II diabetes mellitus with renal complications           |
| 344952   | 2BBI.00   | O/E - left eye stable treated prolif diabetic retinopathy    |
| 339960   | C10FC00   | Type 2 diabetes mellitus with nephropathy                    |
| 343345   | C10EF00   | Type 1 diabetes mellitus with diabetic cataract              |
| 308504   | C109E12   | Type 2 diabetes mellitus with diabetic cataract              |
| 309757   | C108D11   | Type I diabetes mellitus with nephropathy                    |
| 308851   | C109B11   | Type II diabetes mellitus with polyneuropathy                |

| Medcodes | Read code | Description                                                 |
|----------|-----------|-------------------------------------------------------------|
| 341264   | C10F200   | Type 2 diabetes mellitus with neurological complications    |
| 346403   | C10EB00   | Type 1 diabetes mellitus with mononeuropathy                |
| 309007   | C109H12   | Type 2 diabetes mellitus with neuropathic arthropathy       |
| 333002   | F420800   | High risk non proliferative diabetic retinopathy            |
| 242647   | C108700   | Insulin dependent diabetes mellitus with retinopathy        |
| 341800   | C10EC00   | Type 1 diabetes mellitus with polyneuropathy                |
| 219965   | 250 M     | Charcot's Diabetic Arthropathy                              |
| 261411   | F374z00   | Polyneuropathy in disease NOS                               |
| 309758   | C109112   | Type 2 diabetes mellitus with ophthalmic complications      |
| 306133   | 250 N     | Diabetic Nephropathy                                        |
| 309796   | 2BBL.00   | O/E - diabetic maculopathy present both eyes                |
| 331538   | C109012   | Type 2 diabetes mellitus with renal complications           |
| 242648   | C109000   | Non-insulin-dependent diabetes mellitus with renal comps    |
| 206458   | C109200   | Non-insulin-dependent diabetes mellitus with neuro comps    |
| 341701   | F420700   | High risk proliferative diabetic retinopathy                |
| 215440   | C106.12   | Diabetes mellitus with neuropathy                           |
| 342045   | 2BBS.00   | O/E - left eye preproliferative diabetic retinopathy        |
| 340163   | C109E00   | Non-insulin depend diabetes mellitus with diabetic cataract |
| 340357   | C10F600   | Type 2 diabetes mellitus with retinopathy                   |
| 297737   | C108C00   | Insulin dependent diabetes mellitus with polyneuropathy     |
| 336008   | C108211   | Type I diabetes mellitus with neurological complications    |
| 340987   | C10E000   | Type 1 diabetes mellitus with renal complications           |
| 310061   | C109H11   | Type II diabetes mellitus with neuropathic arthropathy      |
| 297731   | C106.00   | Diabetes mellitus with neurological manifestation           |
| 308830   | C109611   | Type II diabetes mellitus with retinopathy                  |
| 233989   | F372.11   | Diabetic polyneuropathy                                     |
| 344951   | 2BBk.00   | O/E - right eye stable treated prolif diabetic retinopathy  |
| 243072   | F420z00   | Diabetic retinopathy NOS                                    |
| 288458   | C105z00   | Diabetes mellitus NOS with ophthalmic manifestation         |
| 233604   | C105100   | Diabetes mellitus, adult onset, ophthalmic manifestation    |
| 340333   | C10ED00   | Type 1 diabetes mellitus with nephropathy                   |
| 308871   | C108F11   | Type I diabetes mellitus with diabetic cataract             |
| 331568   | C108011   | Type I diabetes mellitus with renal complications           |
| 346291   | C10FC11   | Type II diabetes mellitus with nephropathy                  |

| Medcodes | Read code | Description                                                 |
|----------|-----------|-------------------------------------------------------------|
| 340162   | C108012   | Type 1 diabetes mellitus with renal complications           |
| 340507   | C109A11   | Type II diabetes mellitus with mononeuropathy               |
| 252180   | F381311   | Diabetic amyotrophy                                         |
| 308872   | C109C11   | Type II diabetes mellitus with nephropathy                  |
| 347405   | C10EQ00   | Type 1 diabetes mellitus with gastroparesis                 |
| 279345   | C109A00   | Non-insulin dependent diabetes mellitus with mononeuropathy |
| 308715   | C108F00   | Insulin dependent diabetes mellitus with diabetic cataract  |
| 206453   | C104.11   | Diabetic nephropathy                                        |
| 342033   | 2BBR.00   | O/E - right eye preproliferative diabetic retinopathy       |
| 333621   | C108J12   | Type 1 diabetes mellitus with neuropathic arthropathy       |
| 347771   | C10FB11   | Type II diabetes mellitus with polyneuropathy               |
| 297733   | C106y00   | Other specified diabetes mellitus with neurological comps   |
| 256383   | 250 LK    | Kimmelstiel- Wilson Disease/Syndrome                        |
| 340257   | C10FH00   | Type 2 diabetes mellitus with neuropathic arthropathy       |
| 341459   | C10F000   | Type 2 diabetes mellitus with renal complications           |
| 297730   | C105.00   | Diabetes mellitus with ophthalmic manifestation             |
| 261428   | F420100   | Proliferative diabetic retinopathy                          |
| 333249   | C109211   | Type II diabetes mellitus with neurological complications   |
| 261003   | C104z00   | Diabetes mellitus with nephropathy NOS                      |
| 341221   | C10E100   | Type 1 diabetes mellitus with ophthalmic complications      |

#### 10. Read codes to identify dyspnoea

| Medcode | Read code | Description                   |
|---------|-----------|-------------------------------|
| 3092    | R060A00   | [D]Dyspnoea                   |
| 6434    | 1736.00   | Paroxysmal nocturnal dyspnoea |
| 7000    | 2322.00   | O/E - dyspnoea                |
| 18116   | 173D.00   | Nocturnal dyspnoea            |
| 53771   | 173C.11   | Dyspnoea on exertion          |

#### 11. Read codes to identify ventilator requirement

| Medcode | Read code | Description         |
|---------|-----------|---------------------|
| 87337   | 7M36300   | Ventilatory support |

## 12. Read codes to identify COPD

| Medcode | Read code | Description                                                   |
|---------|-----------|---------------------------------------------------------------|
| 1001    | H3...00   | Chronic obstructive pulmonary disease                         |
| 9520    | 66YB.00   | Chronic obstructive pulmonary disease monitoring              |
| 9876    | H38..00   | Severe chronic obstructive pulmonary disease                  |
| 10802   | H37..00   | Moderate chronic obstructive pulmonary disease                |
| 10863   | H36..00   | Mild chronic obstructive pulmonary disease                    |
| 11287   | 66YM.00   | Chronic obstructive pulmonary disease annual review           |
| 18621   | 66YL.00   | Chronic obstructive pulmonary disease follow-up               |
| 37247   | H3z..11   | Chronic obstructive pulmonary disease NOS                     |
| 45770   | 66Yg.00   | Chronic obstructive pulmonary disease disturbs sleep          |
| 45771   | 66Yh.00   | Chronic obstructive pulmonary disease does not disturb sleep  |
| 65733   | Hyu3100   | [X]Other specified chronic obstructive pulmonary disease      |
| 67040   | H3y..11   | Other specified chronic obstructive pulmonary disease         |
| 93568   | H39..00   | Very severe chronic obstructive pulmonary disease             |
| 102685  | 66YB000   | Chronic obstructive pulmonary disease 3 monthly review        |
| 103007  | 66YB100   | Chronic obstructive pulmonary disease 6 monthly review        |
| 103494  | 14B3.12   | History of chronic obstructive pulmonary disease              |
| 104985  | 9NgP.00   | On chronic obstructive pulmonary disease supprtvc cre pathway |
| 105457  | 8CMW500   | Chronic obstructive pulmonary disease care pathway            |

## 13. Read codes to identify heart failure

| Medcode | Read code | Description                                                 |
|---------|-----------|-------------------------------------------------------------|
| 398     | G580.00   | Congestive heart failure                                    |
| 2062    | G58..00   | Heart failure                                               |
| 4024    | G58z.00   | Heart failure NOS                                           |
| 9913    | 1O1..00   | Heart failure confirmed                                     |
| 10079   | G580.12   | Right heart failure                                         |
| 15058   | 14A6.00   | H/O: heart failure                                          |
| 17851   | 8HBE.00   | Heart failure follow-up                                     |
| 21837   | G232.00   | Hypertensive heart&renal dis wth (congestive) heart failure |
| 23707   | G580000   | Acute congestive heart failure                              |
| 27964   | G582.00   | Acute heart failure                                         |
| 28684   | G233.00   | Hypertensive heart and renal disease with renal failure     |
| 30779   | 662W.00   | Heart failure annual review                                 |
| 32671   | G580100   | Chronic congestive heart failure                            |



| Medcode | Read_code | Description                                                 |
|---------|-----------|-------------------------------------------------------------|
| 32898   | 8H2S.00   | Admit heart failure emergency                               |
| 32911   | 9Or..00   | Heart failure monitoring administration                     |
| 32945   | 8CL3.00   | Heart failure care plan discussed with patient              |
| 46912   | 14AM.00   | H/O: Heart failure in last year                             |
| 60099   | 67D4.00   | Heart failure information given to patient                  |
| 66306   | SP11111   | Heart failure as a complication of care                     |
| 69062   | 9N6T.00   | Referred by heart failure nurse specialist                  |
| 71235   | 8Hk0.00   | Referred to heart failure education group                   |
| 83502   | 662p.00   | Heart failure 6 month review                                |
| 94870   | G580400   | Congestive heart failure due to valvular disease            |
| 96799   | G5y4z00   | Post cardiac operation heart failure NOS                    |
| 101137  | G583.11   | HFNEF - heart failure with normal ejection fraction         |
| 101138  | G583.00   | Heart failure with normal ejection fraction                 |
| 103732  | 8CMK.00   | Has heart failure management plan                           |
| 105002  | 679W100   | Education about deteriorating heart failure                 |
| 105542  | 8CeC.00   | Preferred place of care for next exacerbation heart failure |
| 106198  | 661M500   | Heart failure self-management plan agreed                   |

#### 14. Read codes to identify renal failure

| Medcode | Read_code | Description                                             |
|---------|-----------|---------------------------------------------------------|
| 350     | K06..00   | Renal failure unspecified                               |
| 512     | K05..00   | Chronic renal failure                                   |
| 2266    | K04..00   | Acute renal failure                                     |
| 6712    | K050.00   | End stage renal failure                                 |
| 11554   | SP15400   | Renal failure as a complication of care                 |
| 11773   | 7L1A.11   | Dialysis for renal failure                              |
| 15945   | SK05.00   | Renal failure following crush syndrome                  |
| 16929   | D215.00   | Anaemia secondary to renal failure                      |
| 24292   | SP15412   | Post operative renal failure                            |
| 24676   | SK08.00   | Acute renal failure due to rhabdomyolysis               |
| 25394   | D215000   | Anaemia secondary to chronic renal failure              |
| 25582   | K04z.00   | Acute renal failure NOS                                 |
| 28684   | G233.00   | Hypertensive heart and renal disease with renal failure |
| 31549   | 7L1A.00   | Compensation for renal failure                          |
| 32423   | G222.00   | Hypertensive renal disease with renal failure           |

| Medcode | Read_code | Description                                                  |
|---------|-----------|--------------------------------------------------------------|
| 35235   | K04y.00   | Other acute renal failure                                    |
| 48022   | 7L1Ay00   | Other specified compensation for renal failure               |
| 53852   | K05..12   | End stage renal failure                                      |
| 53940   | Kyu2100   | [X]Other chronic renal failure                               |
| 53945   | Kyu2000   | [X]Other acute renal failure                                 |
| 56760   | 7L1B.00   | Placement ambulatory apparatus compensation renal failure    |
| 57919   | K043.00   | Acute drug-induced renal failure                             |
| 59194   | 7L1By00   | Placement ambulatory apparatus- compensate renal failure OS  |
| 61930   | Kyu2.00   | [X]Renal failure                                             |
| 63277   | L393.00   | Acute renal failure following labour and delivery            |
| 63760   | SK05.11   | Renal failure after crushing                                 |
| 64636   | 7L1Az00   | Compensation for renal failure NOS                           |
| 65089   | 7L1Cz00   | Placement other apparatus- compensate for renal failure NOS  |
| 71314   | L093.00   | Renal failure following abortive pregnancy                   |
| 72458   | L393000   | Post-delivery acute renal failure unspecified                |
| 83513   | 7L1C.00   | Placement other apparatus for compensation for renal failure |
| 96179   | L393100   | Post-delivery acute renal failure - delivered with p/n prob  |
| 97198   | K044.00   | Acute renal failure due to urinary obstruction               |
| 100205  | K0E..00   | Acute-on-chronic renal failure                               |
| 101666  | L070300   | Unspecified abortion with renal failure                      |
| 104857  | K043000   | Acute renal failure due to ACE inhibitor                     |
| 105209  | K045.00   | Acute renal failure due to non-traumatic rhabdomyolysis      |
| 105267  | K04B.00   | Acute renal failure due to traumatic rhabdomyolysis          |
| 105739  | K04..11   | ARF - Acute renal failure                                    |
| 106860  | C353600   | Renal failure-associated hyperphosphataemia                  |
| 107241  | K043400   | Acute renal failure induced by non-steroid anti-inflamm drug |

#### 15. Read codes to identify hypertension

| Medcode | Read_code | Description                   |
|---------|-----------|-------------------------------|
| 799     | G20..00   | Essential hypertension        |
| 1894    | G201.00   | Benign essential hypertension |
| 2666    | 14A2.00   | H/O: hypertension             |
| 3425    | 662O.00   | On treatment for hypertension |
| 3712    | G20z.11   | Hypertension NOS              |
| 4372    | G202.00   | Systolic hypertension         |

| Medcode | Read_code | Description                                                  |
|---------|-----------|--------------------------------------------------------------|
| 7329    | G24..00   | Secondary hypertension                                       |
| 10818   | G20z.00   | Essential hypertension NOS                                   |
| 12680   | 8CR4.00   | Hypertension clinical management plan                        |
| 15377   | G200.00   | Malignant essential hypertension                             |
| 16059   | G24z.00   | Secondary hypertension NOS                                   |
| 16565   | 6627      | Good hypertension control                                    |
| 18482   | 662c.00   | Hypertension six month review                                |
| 18590   | 662b.00   | Moderate hypertension control                                |
| 19070   | 662d.00   | Hypertension annual review                                   |
| 21826   | 662F.00   | Hypertension treatm. started                                 |
| 25371   | G241000   | Secondary benign renovascular hypertension                   |
| 27511   | 6628      | Poor hypertension control                                    |
| 30776   | 6629      | Hypertension:follow-up default                               |
| 31387   | G24z000   | Secondary renovascular hypertension NOS                      |
| 31755   | G240.00   | Secondary malignant hypertension                             |
| 34744   | G244.00   | Hypertension secondary to endocrine disorders                |
| 42229   | G24zz00   | Secondary hypertension NOS                                   |
| 44549   | L128.00   | Pre-exist hypertension compl preg childbirth and puerperium  |
| 51635   | G241z00   | Secondary benign hypertension NOS                            |
| 57288   | G241.00   | Secondary benign hypertension                                |
| 59383   | G240000   | Secondary malignant renovascular hypertension                |
| 73293   | G240z00   | Secondary malignant hypertension NOS                         |
| 83473   | G203.00   | Diastolic hypertension                                       |
| 85944   | 7Q01.00   | High cost hypertension drugs                                 |
| 97533   | Gyu2100   | [X]Hypertension secondary to other renal disorders           |
| 98230   | 67H8.00   | Lifestyle advice regarding hypertension                      |
| 101649  | 7Q01y00   | Other specified high cost hypertension drugs                 |
| 102406  | 662P000   | Hypertension 9 month review                                  |
| 102458  | Gyu2000   | [X]Other secondary hypertension                              |
| 105274  | G28..00   | Stage 2 hypertension (NICE - Nat Ins for Hth Clin Excl 2011) |
| 105316  | G25..11   | Stage 1 hypertension                                         |
| 105371  | G25..00   | Stage 1 hypertension (NICE - Nat Ins for Hth Clin Excl 2011) |
| 105480  | G27..00   | Hypertension resistant to drug therapy                       |
| 105487  | G26..11   | Severe hypertension                                          |

| Medcode | Read_code | Description                                                |
|---------|-----------|------------------------------------------------------------|
| 105989  | G26..00   | Severe hypertension (Nat Inst for Health Clinical Ex 2011) |
| 61166   | G21z000   | Hypertensive heart disease NOS without CCF                 |
| 61660   | G211000   | Benign hypertensive heart disease without CCF              |
| 95334   | G210000   | Malignant hypertensive heart disease without CCF           |

## 16. Codes to identify open and closed tibial shaft fracture

| Medcode | Read_code | Description                                              |
|---------|-----------|----------------------------------------------------------|
| 20678   | S333200   | Open fracture of tibia and fibula, shaft                 |
| 28068   | S333.00   | Open fracture of tibia/fibula, shaft                     |
| 28118   | S333000   | Open fracture shaft of tibia                             |
| 28198   | S333z00   | Open fracture of tibia and fibula, shaft, NOS            |
| 28233   | S33y.00   | Open fracture of tibia and fibula, unspecified part, NOS |
| 29084   | S33y200   | Open fracture of tibia and fibula, unspecified part      |
| 29164   | S33y000   | Open fracture of tibia, unspecified part, NOS            |

| Medcode | Read_code | Description                                                |
|---------|-----------|------------------------------------------------------------|
| 971     | S33x000   | Closed fracture of tibia, unspecified part, NOS            |
| 4572    | S33x200   | Closed fracture of tibia and fibula, unspecified part      |
| 29109   | S33x.00   | Closed fracture of tibia and fibula, unspecified part, NOS |
| 29121   | S332.00   | Closed fracture of tibia/fibula, shaft                     |
| 33520   | S332200   | Closed fracture of tibia and fibula, shaft                 |
| 34021   | S332000   | Closed fracture shaft of tibia                             |
| 41971   | S33xz00   | Closed fracture of tibia and fibula, unspecified part, NOS |
| 55464   | S332z00   | Closed fracture of tibia and fibula, shaft, NOS            |

| OPCS-4 | Description                          | Open/closed fracture |
|--------|--------------------------------------|----------------------|
| S571   | Debridement of skin NEC              | Open                 |
| W332   | Debridement of open fracture of bone | Open                 |
| T963   | Debridement of soft tissue NEC       | Open                 |
| W336   | Debridement of bone NEC              | Open                 |

| ICD-10 | Description                                             | Open/closed fracture |
|--------|---------------------------------------------------------|----------------------|
| T14.1  | Open wound of unspecified body region                   | Open                 |
| T01.3  | Open wounds involving multiple regions of lower limb(s) | Open                 |
| S81.7  | Multiple open wounds of lower leg                       | Open                 |

| ICD-10 | Description                                              | Open/closed fracture |
|--------|----------------------------------------------------------|----------------------|
| S81.8  | Open wound of other parts of lower leg                   | Open                 |
| S81.9  | Open wound of lower leg, part unspecified                | Open                 |
| T93.0  | Sequelae of open wound of lower limb                     | Open                 |
| T93.2  | Sequelae of other fractures of lower limb                | Open                 |
| T01.9  | Multiple open wounds, unspecified                        | Open                 |
| T13.1  | Open wound of lower limb, level unspecified              | Open                 |
| T01.8  | Open wounds involving other combinations of body regions | Open                 |
| T94.0  | Sequelae of injuries involving multiple body regions     | Open                 |
| T94.1  | Sequelae of injuries, not specified by body region       | Open                 |
| T12.1  | Fracture of lower limb, level unspecified, open          | Open                 |

17. Read codes to identify Charlson comorbidity index

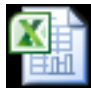

Microsoft Excel 2003  
Worksheet

18. OPCS Codes to identify reoperations

| OPCS-4 | Description                                                                          |
|--------|--------------------------------------------------------------------------------------|
| W242   | Closed reduction of fracture of long bone and rigid internal fixation NEC            |
| O172   | Remanipulation of fracture of long bone and rigid internal fixation NEC              |
| O173   | Remanipulation of fracture of long bone and flexible internal fixation HFQ           |
| O175   | Remanipulation of fragment of bone and fixation using screw                          |
| O178   | Other specified secondary closed reduction of fracture of bone and internal fixation |
| O179   | Unspecified secondary closed reduction of fracture of bone and internal fixation     |
| W231   | Secondary open reduction of fracture of bone and intramedullary fixation HFQ         |
| W232   | Secondary open reduction of fracture of bone and extramedullary fixation HFQ         |
| W236   | Secondary open reduction of fracture of bone and internal fixation HFQ               |
| W248   | Other specified closed reduction of fracture of bone and internal fixation           |
| W249   | Unspecified closed reduction of fracture of bone and internal fixation               |
| W281   | Application of internal fixation to bone NEC                                         |
| W282   | Adjustment to internal fixation of bone NEC                                          |
| W283   | Removal of internal fixation from bone NEC                                           |
| W288   | Other specified other internal fixation of bone                                      |
| W289   | Unspecified other internal fixation of bone                                          |

| <b>OPCS-4</b> | <b>Description</b>                                                                |
|---------------|-----------------------------------------------------------------------------------|
| W235          | Secondary open reduction of fracture of bone and external fixation HFQ            |
| W252          | Closed reduction of fracture of bone and fixation using functional bracing system |
| W253          | Remanipulation of fracture of bone and external fixation HFQ                      |
| W258          | Other specified closed reduction of fracture of bone and external fixation        |
| W259          | Unspecified closed reduction of fracture of bone and external fixation            |
| W301          | Application of external fixation to bone NEC                                      |
| W302          | Adjustment to external fixation of bone NEC                                       |
| W303          | Removal of external fixation from bone NEC                                        |
| W304          | Application of external ring fixation to bone NEC                                 |
| W308          | Other specified other external fixation of bone                                   |
| W309          | Unspecified other external fixation of bone                                       |
| W35.3         | Removal of implanted substance from bone                                          |
| W32           | Other graft of bone                                                               |
| W32.1         | Prepared graft of bone                                                            |
| W32.2         | Allograft of bone NEC                                                             |
| W32.3         | Xenograft of bone                                                                 |
| W32.4         | Synthetic graft of bone                                                           |
| W32.5         | Cancellous chip allograft of bone                                                 |
| W32.8         | Other specified other graft of bone                                               |
| W32.9         | Unspecified other graft of bone                                                   |
| S31.3         | Revision of flap of skin NEC                                                      |

## Additional file 2: Baseline and results at all time points

Table C1. Patient demographic and clinical characteristics at all time points

|                                                      | All enrolled patients (N=805) | Index stay           |                  |                      | 30 days              |                  |                      | 90 days              |                  |                      | 1 year               |                  |                      | 2 years              |                  |                      |
|------------------------------------------------------|-------------------------------|----------------------|------------------|----------------------|----------------------|------------------|----------------------|----------------------|------------------|----------------------|----------------------|------------------|----------------------|----------------------|------------------|----------------------|
|                                                      |                               | No infection (N=775) | Infection (N=30) | p-value <sup>a</sup> | No infection (N=736) | Infection (N=64) | p-value <sup>a</sup> | No infection (N=699) | Infection (N=71) | p-value <sup>a</sup> | No infection (N=606) | Infection (N=80) | p-value <sup>a</sup> | No infection (N=509) | Infection (N=79) | p-value <sup>a</sup> |
| <b>Demographics</b>                                  |                               |                      |                  |                      |                      |                  |                      |                      |                  |                      |                      |                  |                      |                      |                  |                      |
| Age (years), mean (SD)                               | 40.8 (17.2)                   | 40.7 (16.8)          | 43.0 (23.9)      | 0.61                 | 40.5 (16.9)          | 44.0 (19.1)      | 0.17                 | 40.7 (16.9)          | 43.8 (19.1)      | 0.20                 | 40.7 (16.8)          | 45.1 (19.1)      | 0.06                 | 40.5 (16.4)          | 46.4 (20.0)      | 0.02                 |
| Gender, n (%)                                        |                               |                      |                  | 0.84                 |                      |                  | 1.00                 |                      |                  | 1.00                 |                      |                  | 0.89                 |                      |                  | 1.00                 |
| Male                                                 | 590 (73.3)                    | 569 (73.4)           | 21 (70.0)        |                      | 539 (73.2)           | 47 (73.4)        |                      | 508 (72.7)           | 52 (73.2)        |                      | 438 (72.3)           | 59 (73.8)        |                      | 368 (72.3)           | 57 (72.2)        |                      |
| <b>Clinical history/comorbidities</b>                |                               |                      |                  |                      |                      |                  |                      |                      |                  |                      |                      |                  |                      |                      |                  |                      |
| Charlson score, mean (SD)                            | 0.04 (0.23)                   | 0.04 (0.24)          | 0.00 (0.00)      | <0.001               | 0.04 (0.24)          | 0.02 (0.12)      | 0.22                 | 0.04 (0.3)           | 0.01 (0.12)      | 0.13                 | 0.04 (0.24)          | 0.01 (0.11)      | 0.11                 | 0.03 (0.22)          | 0.01 (0.11)      | 0.25                 |
| Smoker, n (%)                                        | 256 (31.8)                    | 247 (31.9)           | 9 (30.0)         | 0.99                 | 239 (32.5)           | 17 (26.6)        | 0.41                 | 233 (33.3)           | 18 (25.4)        | 0.22                 | 202 (33.3)           | 20 (25.0)        | 0.17                 | 160 (31.4)           | 19 (24.1)        | 0.23                 |
| Diabetes, n (%)                                      | 27 (3.4)                      | 27 (3.5)             | 0 (0.0)          | 0.62                 | 26 (3.5)             | 1 (1.6)          | 0.72                 | 26 (3.7)             | 1 (1.4)          | 0.50                 | 21 (3.5)             | 3 (3.8)          | 0.75                 | 15 (3.0)             | 3 (3.8)          | 0.72                 |
| COPD, n (%)                                          | 8 (1.0)                       | 8 (1.0)              | 0 (0.0)          | 1.00                 | 8 (1.1)              | 0 (0.0)          | 1.00                 | 7 (1.0)              | 0 (0.0)          | 1.00                 | 6 (1.0)              | 1 (1.3)          | 0.58                 | 3 (0.6)              | 1 (1.3)          | 0.44                 |
| Congestive heart failure, n (%)                      | 2 (0.3)                       | 2 (0.3)              | 0 (0.0)          | 1.00                 | 2 (0.3)              | 0 (0.0)          | 1.00                 | 1 (0.1)              | 0 (0.0)          | 1.00                 | 0 (0.0)              | 0 (0.0)          | NA                   | 0 (0.0)              | 0 (0.0)          | NA                   |
| Hypertension, n (%)                                  | 12 (1.5)                      | 12 (1.6)             | 0 (0.0)          | 1.00                 | 12 (1.6)             | 0 (0.0)          | 0.61                 | 12 (1.7)             | 0 (0.0)          | 0.62                 | 10 (1.7)             | 0 (0.0)          | 0.62                 | 7 (1.4)              | 0 (0.0)          | 0.60                 |
| Compartment syndrome, n (%)                          | 27 (3.4)                      | 22 (2.8)             | 5 (16.7)         | 0.00                 | 19 (2.6)             | 8 (12.5)         | <0.05                | 18 (2.6)             | 8 (11.3)         | <0.05                | 17 (2.8)             | 9 (11.2)         | 0.00                 | 15 (3.0)             | 8 (10.1)         | <0.05                |
| <b>Index episode</b>                                 |                               |                      |                  |                      |                      |                  |                      |                      |                  |                      |                      |                  |                      |                      |                  |                      |
| Year of intramedullary nailing, mean (SD)            | 2009 (3.6)                    | 2009 (3.6)           | 2009 (3.6)       | 0.72                 | 2009 (3.6)           | 2009 (3.6)       | 0.99                 | 2009 (3.6)           | 2009 (3.6)       | 0.74                 | 2008 (3.4)           | 2008 (3.4)       | 0.99                 | 2008 (3.1)           | 2008 (3.1)       | 0.85                 |
| Inpatient waiting time (days) for surgery, mean (SD) | 1.4 (2.4)                     | 1.4 (2.4)            | 0.7 (2.4)        | 0.14                 | 1.4 (2.4)            | 0.7 (1.7)        | <0.05                | 1.4 (2.5)            | 0.8 (1.7)        | <0.05                | 1.4 (2.4)            | 0.6 (1.0)        | <0.001               | 1.4 (2.2)            | 0.6 (1.0)        | <0.001               |
| Fracture type, n (%)                                 |                               |                      |                  | <0.001               |                      |                  | <0.001               |                      |                  | <0.001               |                      |                  | <0.001               |                      |                  | <0.001               |
| Closed fracture                                      | 663 (82.4)                    | 648 (83.6)           | 15 (50.0)        |                      | 624 (84.8)           | 35 (54.7)        |                      | 595 (85.1)           | 42 (59.2)        |                      | 524 (86.5)           | 49 (61.3)        |                      | 438 (86.1)           | 52 (65.8)        |                      |

|                                                                                          | All enrolled patients (N=805) | Index stay           |                  |                      | 30 days              |                  |                      | 90 days              |                  |                      | 1 year               |                  |                      | 2 years              |                  |                      |
|------------------------------------------------------------------------------------------|-------------------------------|----------------------|------------------|----------------------|----------------------|------------------|----------------------|----------------------|------------------|----------------------|----------------------|------------------|----------------------|----------------------|------------------|----------------------|
|                                                                                          |                               | No infection (N=775) | Infection (N=30) | p-value <sup>a</sup> | No infection (N=736) | Infection (N=64) | p-value <sup>a</sup> | No infection (N=699) | Infection (N=71) | p-value <sup>a</sup> | No infection (N=606) | Infection (N=80) | p-value <sup>a</sup> | No infection (N=509) | Infection (N=79) | p-value <sup>a</sup> |
| Received ≥1 prescription for antibiotics in the 12 months prior to the index stay, n (%) | 60 (7.5)                      | 60 (7.7)             | 0 (0.0)          | 0.16                 | 57 (7.7)             | 3 (4.7)          | 0.47                 | 56 (8.0)             | 3 (4.2)          | 0.36                 | 47 (7.8)             | 4 (5.0)          | 0.51                 | 35 (6.9)             | 5 (6.3)          | 1.000                |
| Received ≥1 prescription for opioids in the 12 months prior to the index stay, n (%)     | 16 (2.0)                      | 15 (1.9)             | 1 (3.3)          | 0.46                 | 15 (2.0)             | 1 (1.6)          | 1.00                 | 15 (2.2)             | 1 (1.4)          | 1.00                 | 11 (1.8)             | 2 (2.5)          | 0.66                 | 8 (1.6)              | 2 (2.5)          | 0.63                 |

Abbreviations: COPD, chronic obstructive pulmonary disease; NA, not applicable; SD, standard deviation.

<sup>a</sup> No infection versus infection, t-tests were performed for comparison of continuous variables and chi-squared (or Fisher exact tests when n was <5) for comparison of categorical variables.



Table D1. Comparative results at all time points

| Time period                                                           | Endpoint               | Bivariate analysis, mean (SD) |                             | Multivariate analysis, mean (95% CI) |                      | Absolute difference (multivariate analysis) |
|-----------------------------------------------------------------------|------------------------|-------------------------------|-----------------------------|--------------------------------------|----------------------|---------------------------------------------|
|                                                                       |                        | Infection                     | No infection                | Infection                            | No infection         |                                             |
| Index stay<br>( <i>N</i> infection = 30; <i>N</i> no infection = 775) | Total costs (£)        | 11,695 (6,553)                | 6,669 (3,133; $p < 0.001$ ) | 10,384 (8,900, 12,116)               | 6,603 (6,411, 6,802) | 3,781 $p < 0.001$                           |
|                                                                       | Inpatient costs (£)    | 11,695 (6,553)                | 6,669 (3,133; $p < 0.001$ ) | 10,384 (8,900, 12,116)               | 6,603 (6,411, 6,802) | 3,781 $p < 0.001$                           |
|                                                                       | LOS (days)             | 22.6 (20.0)                   | 9.7 (12.1; $p < 0.001$ )    | 17.6 (13.0, 23.7)                    | 8.5 (8.0, 9.0)       | 9.05 $p < 0.001$                            |
|                                                                       | ICU LOS (days)         | 1.5 (8.2)                     | 0.1 (1.1; $p = 0.53$ )      | 0.1 (0.1, 0.2)                       | 0.0 (0.0, 0.01)      | 0.115 $p < 0.001$                           |
|                                                                       | Reoperations (number)  | 0.3 (0.8)                     | 0.0 (0.1; $p < 0.001$ )     | 0.1 (0.0, 0.2)                       | 0.0 (0.0, 0.0)       | 0.070 $p < 0.001$                           |
|                                                                       | Reoperations (rate, %) | 13.3                          | 1.3 ( $p < 0.001$ )         | 9.7 (3.1, 26.3)                      | 1.1 (0.5, 2.1)       | 8.6 $p < 0.001$                             |

| Time period                                                                                        | Endpoint                                          | Bivariate analysis, mean (SD) |                           | Multivariate analysis, mean (95% CI) |                      | Absolute difference (multivariate analysis) |
|----------------------------------------------------------------------------------------------------|---------------------------------------------------|-------------------------------|---------------------------|--------------------------------------|----------------------|---------------------------------------------|
|                                                                                                    |                                                   | Infection                     | No infection              | Infection                            | No infection         |                                             |
| Index stay + 30 days post-discharge<br><br>( <i>N</i> infection = 64; <i>N</i> no infection = 736) | Total costs (£)                                   | 12,673 (7,345)                | 7,089 (3,588; $p<0.001$ ) | 11,257 (10,045, 12,615)              | 7,017 (6,792, 7,248) | 4,241 $p<0.001$                             |
|                                                                                                    | Inpatient costs (£)                               | 12,367 (7,290)                | 6,829 (3,397; $p<0.001$ ) | 11,008 (9,818, 12,343)               | 6,768 (6,551, 6,993) | 4,240 $p<0.001$                             |
|                                                                                                    | Hospital outpatient/ambulatory costs (£)          | 215 (116)                     | 155 (94; $p=0.4$ )        | 245 (145, 345)                       | 152 (125, 179)       | 93 $p=0.07$                                 |
|                                                                                                    | Primary care costs (£)                            | 289 (555)                     | 254 (673, $p=0.24$ )      | 243 (139, 426)                       | 205 (175, 241)       | 38 $p=0.57$                                 |
|                                                                                                    | LOS (days)                                        | 19.3 (19.2)                   | 10.1 (12.2; $p<0.001$ )   | 15.0 (12.1, 18.6)                    | 8.9 (8.4, 9.5)       | 6.1 $p<0.001$                               |
|                                                                                                    | ICU LOS (days)                                    | 0.7 (5.6)                     | 0.1 (1.1; $p=0.4$ )       | 0.1 (0.0, 0.1)                       | 0.0 (0.0, 0.0)       | 0.0 $p<0.001$                               |
|                                                                                                    | Readmissions (number)                             | 0.6 (0.6)                     | 0.1 (0.3; $p<0.001$ )     | 0.5 (0.4, 0.7)                       | 0.1 (0.1, 0.1)       | 0.4 $p<0.001$                               |
|                                                                                                    | Readmissions (rate, %)                            | 48.4                          | 7.6 ( $p<0.001$ )         | 44.1 (31.5, 57.5)                    | 7.1 (5.4, 9.2)       | 37.0 $p<0.001$                              |
|                                                                                                    | Reoperations (number)                             | 0.2 (0.7)                     | 0.0 (0.1; $p<0.001$ )     | 0.1 (0.1, 0.2)                       | 0.0 (0.0, 0.0)       | 0.1 $p<0.001$                               |
|                                                                                                    | Reoperations (rate, %)                            | 14.1                          | 1.6 ( $p<0.001$ )         | 11.5 (5.4, 22.9)                     | 1.3 (0.7, 2.5)       | 10.2 $p<0.001$                              |
|                                                                                                    | Amputation (rate, %)                              | 3.1                           | 0.1 ( $p<0.01$ )          | Not feasible                         |                      |                                             |
|                                                                                                    | Hospital outpatient/ambulatory referrals (number) | 1.6 (0.9)                     | 1.2 (0.5; $p=0.28$ )      | 1.6 (1.1, 2.2)                       | 1.21 (1.0, 1.4)      | 0.45 $p=0.13$                               |
|                                                                                                    | Total costs (£)                                   | 13,621 (7,827)                | 7,527 (4,326; $p<0.001$ ) | 11,949 (10,634, 13,427)              | 7,423 (7,160, 7,696) | 4,526 $p<0.001$                             |
|                                                                                                    | Inpatient costs (£)                               | 13,154 (7,673)                | 7,157 (4,111; $p<0.001$ ) | 11,532 (10,246, 12,979)              | 7,072 (6,818, 7,336) | 4,459 $p<0.001$                             |

| Time period                                                                                  | Endpoint                                          | Bivariate analysis, mean (SD) |                           | Multivariate analysis, mean (95% CI) |                      | Absolute difference (multivariate analysis) |
|----------------------------------------------------------------------------------------------|---------------------------------------------------|-------------------------------|---------------------------|--------------------------------------|----------------------|---------------------------------------------|
|                                                                                              |                                                   | Infection                     | No infection              | Infection                            | No infection         |                                             |
| Index stay + 90 days post-discharge<br><br>( <i>N infection = 71; N no infection = 699</i> ) | Hospital outpatient/ambulatory costs (£)          | 183 (87)                      | 171 (135; $p=0.53$ )      | 194 (125, 264)                       | 170 (141, 198)       | 25 $p=0.515$                                |
|                                                                                              | Primary care costs (£)                            | 436 (637)                     | 353 (737; $p<0.05$ )      | 428 (290, 630)                       | 299 (264, 338)       | 129 $p=0.084$                               |
|                                                                                              | LOS (days)                                        | 21.7 (21.5)                   | 11.1 (14.6<br>$p<0.001$ ) | 16.4 (13.2, 20.4)                    | 9.6 (9.0, 10.3)      | 6.8 $p<0.001$                               |
|                                                                                              | ICU LOS (days)                                    | 0.7 (5.3)                     | 0.1 (1.2; $p=0.576$ )     | 0.0 (0.0, 0.1)                       | 0.0 (0.0, 0.0)       | 0.0 $p<0.001$                               |
|                                                                                              | Readmissions (number)                             | 0.8 (0.8)                     | 0.2 (0.6; $p<0.001$ )     | 0.7 (0.5, 0.9)                       | 0.2 (0.2, 0.2)       | 0.5 $p<0.001$                               |
|                                                                                              | Readmissions (rate, %)                            | 57.7                          | 17.2 ( $p<0.001$ )        | 5.4 (41.5, 65.9)                     | 16.5 (13.9, 19.5)    | 37.4 $p<0.001$                              |
|                                                                                              | Reoperations (number)                             | 0.3 (0.7)                     | 0.1 (0.3; $p<0.001$ )     | 0.2 (0.1, 0.3)                       | 0.1 (0.0, 0.1)       | 0.1 $p=0.001$                               |
|                                                                                              | Reoperations (rate, %)                            | 18.3                          | 6.0 ( $p<0.001$ )         | 14.3 (7.7, 25.0)                     | 5.4 (3.9, 7.4)       | 9.0 $p<0.05$                                |
|                                                                                              | Amputation (rate, %)                              | 2.8                           | 0.1 ( $p<0.05$ )          | Not feasible                         |                      |                                             |
|                                                                                              | Hospital outpatient/ambulatory referrals (number) | 1.2 (0.6)                     | 1.4 (0.9; $p=0.92$ )      | 1.3 (0.9, 1.7)                       | 1.4 (1.2, 1.5)       | 0.0 $p=0.835$                               |
| Index stay + 1 year post-discharge<br><br>( <i>N infection = 80; N no infection = 606</i> )  | Total costs (£)                                   | 16,800 (12,663)               | 8,435 (5,330; $p<0.001$ ) | 14,756 (13,123, 16,593)              | 8,279 (7,946, 8,626) | 6,478 $p<0.001$                             |
|                                                                                              | Inpatient costs (£)                               | 15,580 (11,872)               | 7,746 (5,060; $p<0.001$ ) | 13,672 (12,122, 15,420)              | 7,616 (7,301, 7,944) | 6,056 $p<0.001$                             |
|                                                                                              | Hospital outpatient/ambulatory costs (£)          | 250 (251)                     | 239 (218; $p=0.77$ )      | 220 (151, 288)                       | 244 (211, 277)       | 25 $p=0.516$                                |
|                                                                                              | Primary care costs (£)                            | 1,139 (1,657)                 | 630 (903; $p<0.001$ )     | 1,017 (769, 1,344)                   | 551 (498, 609)       | 466 $p<0.001$                               |

| Time period                                                                                  | Endpoint                                          | Bivariate analysis, mean (SD) |                        | Multivariate analysis, mean (95% CI) |                      | Absolute difference (multivariate analysis) |
|----------------------------------------------------------------------------------------------|---------------------------------------------------|-------------------------------|------------------------|--------------------------------------|----------------------|---------------------------------------------|
|                                                                                              |                                                   | Infection                     | No infection           | Infection                            | No infection         |                                             |
|                                                                                              | LOS (days)                                        | 28.5 (33.3)                   | 12.6 (21.3; p<0.001)   | 21.9 (17.3, 27.7)                    | 10.5 (9.7, 11.4)     | 11.4 p<0.001                                |
|                                                                                              | ICU LOS (days)                                    | 0.2 (1.5)                     | 0.1 (1.1; p=0.758)     | 0.0 (0.0, 0.0)                       | 0.0 (0.0, 0.0)       | 0.0 p=0.914                                 |
|                                                                                              | Readmissions (number)                             | 1.5 (1.5)                     | 0.5 (0.9; p<0.001)     | 1.5 (1.2, 1.8)                       | 0.5 (0.4, 0.6)       | 1.0 p<0.001                                 |
|                                                                                              | Readmissions (rate, %)                            | 75                            | 36 (p<0.001)           | 74.4 (63.4, 83.0)                    | 35.9 (32.1, 39.9)    | 38.5 p<0.001                                |
|                                                                                              | Reoperations (number)                             | 0.6 (1.0)                     | 0.2 (0.5; p<0.001)     | 0.6 (0.5, 0.8)                       | 0.2 (0.2, 0.3)       | 0.4 p<0.001                                 |
|                                                                                              | Reoperations (rate, %)                            | 37.5                          | 21.3 (p<0.01)          | 38.6 (28.3, 50.0)                    | 20.3 (17.2, 23.8)    | 18.2 p<0.001                                |
|                                                                                              | Amputation (rate, %)                              | 2.5                           | 0.2 (p<0.05)           | Not feasible                         |                      |                                             |
|                                                                                              | Hospital outpatient/ambulatory referrals (number) | 1.8 (1.6)                     | 1.8 (1.5; p=0.66)      | 1.7 (1.2, 2.1)                       | 1.8 (1.6, 2.1)       | 0.2 p=0.44                                  |
| Index stay + 2 years post-discharge<br><br>( <i>N infection = 79; N no infection = 509</i> ) | Total costs (£)                                   | 18,779 (14,929)               | 9,611 (6,284; p<0.001) | 16,626 (14,664, 18,849)              | 9,439 (8,998, 9,901) | 7,187 p<0.001                               |
|                                                                                              | Inpatient costs (£)                               | 16,900 (13,720)               | 8,573 (5,729; p<0.001) | 14,898 (13,106, 16,935)              | 8,447 (8,044, 8,871) | 6,451 p<0.001                               |
|                                                                                              | Hospital outpatient/ambulatory costs (£)          | 282 (296)                     | 275 (265; p=0.893)     | 264 (189, 338)                       | 277 (243, 310)       | 13 p=0.747                                  |
|                                                                                              | Primary care costs (£)                            | 1,758 (2,437)                 | 929 (1,179; p<0.01)    | 1,487 (1,149, 1,924)                 | 821 (742, 907)       | 666 p<0.001                                 |
|                                                                                              | LOS (days)                                        | 31.5 (38.1)                   | 13.4 (22.6; p<0.001)   | 24.6 (19.6, 30.8)                    | 11.3 (10.4, 12.3)    | 13.3 p<0.001                                |
|                                                                                              | ICU LOS (days)                                    | 0.2 (1.5)                     | 0.1 (1.2; p=0.24)      | 0.0 (0.0, 0.0)                       | 0.0 (0.0, 0.0)       | 0.0 p=0.20                                  |

| Time period | Endpoint                                          | Bivariate analysis, mean (SD) |                    | Multivariate analysis, mean (95% CI) |                   | Absolute difference (multivariate analysis) |
|-------------|---------------------------------------------------|-------------------------------|--------------------|--------------------------------------|-------------------|---------------------------------------------|
|             |                                                   | Infection                     | No infection       | Infection                            | No infection      |                                             |
|             | Readmissions (number)                             | 2.1 (2.3)                     | 1.0 (1.5; p<0.001) | 2.2 (1.9, 2.6)                       | 0.9 (0.8, 1.0)    | 1.3 p<0.001                                 |
|             | Readmissions (rate, %)                            | 77.2                          | 51.1 (p<0.001)     | 77.6 (67.0, 85.6)                    | 51.4 (46.9, 56.8) | 26.3 p<0.001                                |
|             | Reoperations (number)                             | 0.8 (1.1)                     | 0.4 (0.7; p<0.01)  | 0.8 (0.6, 1.0)                       | 0.4 (0.3, 0.4)    | 0.4 p<0.001                                 |
|             | Reoperations (rate, %)                            | 46.8                          | 32.4 (p<0.05)      | 49.0 (37.7, 60.3)                    | 31.2 (27.2, 35.5) | 17.7 p<0.05                                 |
|             | Amputation (rate, %)                              | 3.8                           | 0.2 (p<0.01)       | Not feasible                         |                   |                                             |
|             | Hospital outpatient/ambulatory referrals (number) | 2.0 (2.0)                     | 2.1 (1.9; p=0.55)  | 2.0 (1.5, 2.5)                       | 2.1 (1.8, 2.3)    | 0.1 p=0.82                                  |

Abbreviations: CI, confidence interval; ICU, intensive care unit; LOS, length of stay; NA, not applicable; SD, standard deviation.

**Table D2. 1 year cost breakdown (£) – inpatient setting**

| Endpoint               | Bivariate analysis, mean (SD) |               |
|------------------------|-------------------------------|---------------|
|                        | Infection                     | No infection  |
| Total inpatient costs  | 15,580 (11,872)               | 7,746 (5,060) |
| HRG costs              | 15,488 (11,743)               | 7,702 (4,985) |
| Unbundled HRG costs    | 36 (116)                      | 16 (72)       |
| Critical care costs    | 56 (381)                      | 26 (208)      |
| Specialised care costs | 0 (0)                         | 2 (42)        |

Abbreviations: HRG, Healthcare Resource Group; SD, standard deviation.

**Table D3. 1 year healthcare resource use and cost breakdown – primary care**

| Endpoint                         | Bivariate analysis, mean (SD) |              |
|----------------------------------|-------------------------------|--------------|
|                                  | Infection                     | No infection |
| Costs (£)                        |                               |              |
| Total primary care costs         | 1,139 (1,657)                 | 630 (903)    |
| Total drug costs                 | 368 (1,031)                   | 198 (681)    |
| Total test costs                 | 147 (247)                     | 95 (186)     |
| Imaging test costs               | 27 (71)                       | 25 (72)      |
| Total consultation costs         | 625 (721)                     | 338 (334)    |
| GP                               | 322 (317)                     | 212 (225)    |
| Nurse                            | 140 (362)                     | 36 (75)      |
| Other healthcare professional    | 120 (243)                     | 55 (121)     |
| Administrative                   | 42 (36)                       | 35 (30)      |
| Healthcare resource use (number) |                               |              |
| Total tests                      | 25 (52)                       | 14 (30)      |
| Imaging tests                    | 0.4 (0.8)                     | 0.5 (1.5)    |
| Total consultations              | 52 (51)                       | 33 (25)      |
| GP                               | 14 (13)                       | 9 (9)        |
| Nurse                            | 10 (21)                       | 3 (5)        |
| Other healthcare professional    | 9 (17)                        | 4 (8)        |
| Administrative                   | 22 (18)                       | 18 (15)      |

Abbreviations: GP, General Practitioner; SD, standard deviation.

**Table D4. Subgroup analyses of 1 year inpatient costs – infection type (deep versus superficial)**

|                                                   | <b>No infection<br/>(N=606)</b> | <b>Superficial infection<br/>(N=54)</b> | <b>Deep infection<br/>(N=26)</b> |
|---------------------------------------------------|---------------------------------|-----------------------------------------|----------------------------------|
| Bivariate analysis, mean (SD)                     | £7,746 (£5,060)                 | £14,232 (£8,633)                        | £18,378 (£16,592)                |
| Multivariate analysis, mean (95% CI) <sup>a</sup> | £7,614 (£7,301, £7,941)         | £12,814 (£11,093, £14,803)              | £15,513 (£12,640, £19,040)       |

Abbreviations: CI, confidence interval; COPD, chronic obstructive pulmonary disease; SD, standard deviation.

<sup>a</sup> Adjusted for open/closed fracture, age, smoker, year at index, diabetes, COPD, days prior nailing and compartment syndrome.

**Table D5. Subgroup analyses of 1 year inpatient costs – fracture type (open versus closed)**

| <b>Fracture type</b>                              | <b>No infection<br/>(N=606)</b> |                          | <b>Infection<br/>(N=80)</b> |                            |
|---------------------------------------------------|---------------------------------|--------------------------|-----------------------------|----------------------------|
|                                                   | <b>Closed<br/>(N=524)</b>       | <b>Open<br/>(N=82)</b>   | <b>Closed<br/>(N=49)</b>    | <b>Open<br/>(N=31)</b>     |
| Bivariate analysis, mean (SD)                     | £7,433 (£3,957)                 | £9,741 (£9,247)          | £12,291 (£7,366)            | £20,778 (£15,451)          |
| Multivariate analysis, mean (95% CI) <sup>a</sup> | £7,278 (£6,956, £7,614)         | £9,495 (£8,469, £10,645) | £12,178 (£10,492, £14,136)  | £19,542 (£16,166, £23,623) |

Abbreviations: CI, confidence interval; COPD, chronic obstructive pulmonary disease; SD, standard deviation.

<sup>a</sup> Adjusted for age, smoker, year at index, diabetes, COPD, days prior nailing and compartment syndrome.

Table D6. Sensitivity analyses

| Time period                                                                                        | Endpoint              | Bivariate analysis, mean (SD) |                             | Multivariate analysis, mean (95% CI) |                      | Absolute difference (multivariate analysis) |
|----------------------------------------------------------------------------------------------------|-----------------------|-------------------------------|-----------------------------|--------------------------------------|----------------------|---------------------------------------------|
|                                                                                                    |                       | Infection                     | No infection                | Infection                            | No infection         |                                             |
| Index stay<br><br>( <i>N</i> infection = 24; <i>N</i> no infection = 564)                          | Total costs (£)       | 12,554 (6,832)                | 6,580 (3,123; $p < 0.001$ ) | 11,110 (9,328, 13,232)               | 6,517 (6,295, 6,747) | 4,593 $p < 0.001$                           |
|                                                                                                    | LOS (days)            | 24.2 (20.9)                   | 9.4 (11.7; $p < 0.001$ )    | 18.6 (13.1, 26.4)                    | 8.5 (7.9, 9.1)       | 10.1 $p < 0.001$                            |
|                                                                                                    | Reoperations (number) | 0.3 (0.9)                     | 0.0 (0.1; $p < 0.001$ )     | 0.1 (0.0, 0.3)                       | 0.0 (0.0, 0.0)       | 0.1 $p < 0.001$                             |
|                                                                                                    | Reoperations (rate)   | 12.5                          | 1.6 ( $p < 0.01$ )          | 9.9 (2.7, 30.6)                      | 1.4 (0.7, 2.8)       | 8.5 $p < 0.05$                              |
| Index stay + 30 days post-discharge<br><br>( <i>N</i> infection = 51; <i>N</i> no infection = 537) | Total costs (£)       | 12,957 (7,385)                | 7,077 (3,747; $p < 0.001$ ) | 11,453 (10,016, 13,096)              | 7,010 (6,739, 7,292) | 4,444 $p < 0.001$                           |
|                                                                                                    | LOS (days)            | 20.2 (19.4)                   | 10.0 (12.4; $p < 0.001$ )   | 15.6 (12.1, 20.0)                    | 9.1 (8.4, 9.8)       | 6.5 $p < 0.001$                             |
|                                                                                                    | Readmissions (number) | 0.6 (0.6)                     | 0.1 (0.3; $p < 0.001$ )     | 0.5 (0.3, 0.7)                       | 0.1 (0.1, 0.1)       | 0.4 $p < 0.001$                             |
|                                                                                                    | Readmissions (rate)   | 47.1                          | 8.4 ( $p < 0.001$ )         | 45.7 (32.0, 60.0)                    | 7.9 (5.9, 10.5)      | 37.8 $p < 0.001$                            |
|                                                                                                    | Reoperations (number) | 0.3 (0.7)                     | 0.0 (0.2; $p < 0.001$ )     | 0.1 (0.1, 0.3)                       | 0.0 (0.0, 0.0)       | 0.1 $p < 0.001$                             |
|                                                                                                    | Reoperations (rate)   | 13.7                          | 2.2 ( $p < 0.001$ )         | 11.7 (5.0, 25.3)                     | 1.8 (1.0, 3.4)       | 9.9 $p < 0.001$                             |
| Index stay + 90 days post-discharge<br><br>( <i>N</i> infection = 59; <i>N</i> no infection = 529) | Total costs (£)       | 13,620 (7,762)                | 7,584 (4,622; $p < 0.001$ ) | 11,869 (10,364, 13,593)              | 7,480 (7,160, 7,813) | 4,389 $p < 0.001$                           |
|                                                                                                    | LOS (days)            | 21.9 (21.8)                   | 11.2 (15.2; $p < 0.001$ )   | 16.3 (12.7, 21.0)                    | 9.8 (9.1, 10.7)      | 6.5 $p < 0.001$                             |
|                                                                                                    | Readmissions (number) | 0.8 (0.8)                     | 0.2 (0.5; $p < 0.001$ )     | 0.7 (0.5, 0.9)                       | 0.2 (0.2, 0.2)       | 0.5 $p < 0.001$                             |



| Time period                                                                                  | Endpoint              | Bivariate analysis, mean (SD) |                        | Multivariate analysis, mean (95% CI) |                       | Absolute difference (multivariate analysis) |
|----------------------------------------------------------------------------------------------|-----------------------|-------------------------------|------------------------|--------------------------------------|-----------------------|---------------------------------------------|
|                                                                                              |                       | Infection                     | No infection           | Infection                            | No infection          |                                             |
|                                                                                              | Readmissions (rate)   | 57.6                          | 18.1 (p<0.001)         | 54.9 (41.1, 68.0)                    | 17.2 (14.1, 20.8)     | 37.7 p<0.001                                |
|                                                                                              | Reoperations (number) | 0.3 (0.7)                     | 0.1 (0.3; p<0.05)      | 0.2 (0.1, 0.3)                       | 0.1 (0.0, 0.1)        | 0.1 p<0.05                                  |
|                                                                                              | Reoperations (rate)   | 15.3                          | 7.0 (p<0.05)           | 11.1 (5.2, 22.0)                     | 6.1 (4.3, 8.7)        | 5.0 p=0.1438                                |
| Index stay + 1 year post-discharge<br><br>( <i>N infection = 72; N no infection = 516</i> )  | Total costs (£)       | 16,788 (12,914)               | 8,449 (5,525; p<0.001) | 14,597 (12,841, 16,593)              | 8,294 (7,920, 8,686)  | 6,303 p<0.001                               |
|                                                                                              | LOS (days)            | 29.2 (34.6)                   | 12.3 (21.1; p<0.001)   | 22.5 (17.7, 28.5)                    | 10.3 (9.4, 11.2)      | 12.2 p<0.001                                |
|                                                                                              | Readmissions (number) | 1.5 (1.6)                     | 0.5 (0.9; p<0.001)     | 1.5 (1.2, 1.8)                       | 0.5 (0.4, 0.6)        | 1.0 p<0.001                                 |
|                                                                                              | Readmissions (rate)   | 75.0                          | 35.5 (p<0.001)         | 75.0 (63.6, 83.8)                    | 35.3 (31.2, 39.6)     | 39.7 p<0.001                                |
|                                                                                              | Reoperations (number) | 0.6 (0.9)                     | 0.2 (0.5; p<0.01)      | 0.5 (0.4, 0.7)                       | 0.2 (0.2, 0.3)        | 0.3 p<0.001                                 |
|                                                                                              | Reoperations (rate)   | 36.1                          | 21.7 (p<0.05)          | 37.4 (26.7, 49.5)                    | 20.7 (17.3, 24.5)     | 16.8 p<0.05                                 |
| Index stay + 2 years post-discharge<br><br>( <i>N infection = 79; N no infection = 509</i> ) | Total costs (£)       | 18,779 (14,929)               | 9,611 (6,284; p<0.001) | 16,626 (14,664, 18,849)              | 9,439 (8,998, 9,901), | 7,187 p<0.001                               |
|                                                                                              | LOS (days)            | 31.5 (38.1)                   | 13.4 (22.6; p<0.001)   | 24.6 (19.6, 30.8)                    | 11.3 (10.4, 12.3)     | 13.3 p<0.001                                |
|                                                                                              | Readmissions (number) | 2.1 (2.3)                     | 1.0 (1.5; p<0.001)     | 2.2 (1.9, 2.5)                       | 0.9 (0.8, 1.0)        | 1.3 p<0.001                                 |
|                                                                                              | Readmissions (rate)   | 77.2                          | 51.1 (p<0.001)         | 77.6 (67.0, 85.6)                    | 51.4 (46.9, 55.8)     | 26.3 p<0.001                                |
|                                                                                              | Reoperations (number) | 0.8 (1.1)                     | 0.4 (0.7; p<0.01)      | 0.8 (0.6, 1.0)                       | 0.4 (0.3, 0.5)        | 0.4 p<0.001                                 |

1  
2  
3  
4  
5  
6  
7  
8  
9  
10  
11  
12  
13  
14  
15  
16  
17  
18  
19  
20  
21  
22  
23  
24  
25  
26  
27  
28  
29  
30  
31  
32  
33  
34  
35  
36  
37  
38  
39  
40  
41  
42  
43  
44  
45  
46  
47

| Time period | Endpoint            | Bivariate analysis, mean (SD) |               | Multivariate analysis, mean (95% CI) |                   | Absolute difference (multivariate analysis) |
|-------------|---------------------|-------------------------------|---------------|--------------------------------------|-------------------|---------------------------------------------|
|             |                     | Infection                     | No infection  | Infection                            | No infection      |                                             |
|             | Reoperations (rate) | 46.8                          | 32.4 (p<0.05) | 49.0 (37.7, 60.3)                    | 31.2 (27.2, 35.5) | 17.7 p<0.05                                 |

Abbreviations: CI, confidence interval; LOS, length of stay; NA, not applicable; SD, standard deviation.

For peer review only

**STROBE 2007 (v4) Statement—Checklist of items that should be included in reports of *cohort studies***

| Section/Topic                | Item # | Recommendation                                                                                                                                                                       | Reported on page # |
|------------------------------|--------|--------------------------------------------------------------------------------------------------------------------------------------------------------------------------------------|--------------------|
| <b>Title and abstract</b>    | 1      | (a) Indicate the study's design with a commonly used term in the title or the abstract                                                                                               | 3                  |
|                              |        | (b) Provide in the abstract an informative and balanced summary of what was done and what was found                                                                                  | 3                  |
| <b>Introduction</b>          |        |                                                                                                                                                                                      |                    |
| Background/rationale         | 2      | Explain the scientific background and rationale for the investigation being reported                                                                                                 | 5-6                |
| Objectives                   | 3      | State specific objectives, including any prespecified hypotheses                                                                                                                     | 6                  |
| <b>Methods</b>               |        |                                                                                                                                                                                      |                    |
| Study design                 | 4      | Present key elements of study design early in the paper                                                                                                                              | 6                  |
| Setting                      | 5      | Describe the setting, locations, and relevant dates, including periods of recruitment, exposure, follow-up, and data collection                                                      | 6-7                |
| Participants                 | 6      | (a) Give the eligibility criteria, and the sources and methods of selection of participants. Describe methods of follow-up                                                           | 7                  |
|                              |        | (b) For matched studies, give matching criteria and number of exposed and unexposed                                                                                                  | NA                 |
| Variables                    | 7      | Clearly define all outcomes, exposures, predictors, potential confounders, and effect modifiers. Give diagnostic criteria, if applicable                                             | 7-8                |
| Data sources/<br>measurement | 8*     | For each variable of interest, give sources of data and details of methods of assessment (measurement). Describe comparability of assessment methods if there is more than one group | 7:9                |
| Bias                         | 9      | Describe any efforts to address potential sources of bias                                                                                                                            | 9-10               |
| Study size                   | 10     | Explain how the study size was arrived at                                                                                                                                            | 7                  |
| Quantitative variables       | 11     | Explain how quantitative variables were handled in the analyses. If applicable, describe which groupings were chosen and why                                                         | 9-10               |
| Statistical methods          | 12     | (a) Describe all statistical methods, including those used to control for confounding                                                                                                | 9-10               |
|                              |        | (b) Describe any methods used to examine subgroups and interactions                                                                                                                  | 9-10               |
|                              |        | (c) Explain how missing data were addressed                                                                                                                                          | 9                  |
|                              |        | (d) If applicable, explain how loss to follow-up was addressed                                                                                                                       | 10                 |
|                              |        | (e) Describe any sensitivity analyses                                                                                                                                                | 9-10               |
| <b>Results</b>               |        |                                                                                                                                                                                      |                    |

|                          |     |                                                                                                                                                                                                              |       |
|--------------------------|-----|--------------------------------------------------------------------------------------------------------------------------------------------------------------------------------------------------------------|-------|
| Participants             | 13* | (a) Report numbers of individuals at each stage of study—eg numbers potentially eligible, examined for eligibility, confirmed eligible, included in the study, completing follow-up, and analysed            | 10:14 |
|                          |     | (b) Give reasons for non-participation at each stage                                                                                                                                                         | 9     |
|                          |     | (c) Consider use of a flow diagram                                                                                                                                                                           | 10    |
| Descriptive data         | 14* | (a) Give characteristics of study participants (eg demographic, clinical, social) and information on exposures and potential confounders                                                                     | 10-11 |
|                          |     | (b) Indicate number of participants with missing data for each variable of interest                                                                                                                          | 10:14 |
|                          |     | (c) Summarise follow-up time (eg, average and total amount)                                                                                                                                                  | 10    |
| Outcome data             | 15* | Report numbers of outcome events or summary measures over time                                                                                                                                               | 10:14 |
| Main results             | 16  | (a) Give unadjusted estimates and, if applicable, confounder-adjusted estimates and their precision (eg, 95% confidence interval). Make clear which confounders were adjusted for and why they were included | 11:14 |
|                          |     | (b) Report category boundaries when continuous variables were categorized                                                                                                                                    | 10:14 |
|                          |     | (c) If relevant, consider translating estimates of relative risk into absolute risk for a meaningful time period                                                                                             | NA    |
| Other analyses           | 17  | Report other analyses done—eg analyses of subgroups and interactions, and sensitivity analyses                                                                                                               | 14-15 |
| <b>Discussion</b>        |     |                                                                                                                                                                                                              |       |
| Key results              | 18  | Summarise key results with reference to study objectives                                                                                                                                                     | 15    |
| <b>Limitations</b>       |     |                                                                                                                                                                                                              |       |
| Interpretation           | 20  | Give a cautious overall interpretation of results considering objectives, limitations, multiplicity of analyses, results from similar studies, and other relevant evidence                                   | 16    |
| Generalisability         | 21  | Discuss the generalisability (external validity) of the study results                                                                                                                                        | 15-16 |
| <b>Other information</b> |     |                                                                                                                                                                                                              |       |
| Funding                  | 22  | Give the source of funding and the role of the funders for the present study and, if applicable, for the original study on which the present article is based                                                | 17    |

\*Give information separately for cases and controls in case-control studies and, if applicable, for exposed and unexposed groups in cohort and cross-sectional studies.

**Note:** An Explanation and Elaboration article discusses each checklist item and gives methodological background and published examples of transparent reporting. The STROBE checklist is best used in conjunction with this article (freely available on the Web sites of PLoS Medicine at <http://www.plosmedicine.org/>, Annals of Internal Medicine at <http://www.annals.org/>, and Epidemiology at <http://www.epidem.com/>). Information on the STROBE Initiative is available at [www.strobe-statement.org](http://www.strobe-statement.org).
