# Supplementary material for: The economic burden of infections following intramedullary nailing for a tibial shaft fracture in England
Source: PubMed Central journal article supplement — BMJ Open. 2020 Aug 26;10(8):e035404. doi: 10.1136/bmjopen-2019-035404 (PMC7451536; doi:10.1136/bmjopen-2019-035404), 2020-08-26
Supplement: bmjopen-2019-035404supp001.pdf [file bmjopen-2019-035404supp001.pdf]

**Additional file 1: Study protocol****PROTOCOL INFORMATION REQUIRED**

The following sections below **must** be included in the CPRD ISAC research protocol. Please refer to the guidance on '**Contents of CPRD ISAC Research Protocols**' ([www.cprd.com/isac](http://www.cprd.com/isac)) for more information on how to complete the sections below. Pages should be numbered. All abbreviations must be defined on first use.

**Applicants must complete all sections listed below**  
**Sections which do not apply should be completed as 'Not Applicable'**

**A. Study Title<sup>§</sup>**

*§Please note: This information will be published on CPRD's website as part of its transparency policy*

Healthcare Resource Utilization and Costs among Patients with and without Infection after Intramedullary Nailing for A Tibial Shaft Fracture

**B. Lay Summary (Max. 200 words)<sup>§</sup>**

*§Please note: This information will be published on CPRD's website as part of its transparency policy*

Tibial shaft fractures are the most common long bone fracture of the lower limbs. Intramedullary nailing is the most frequent surgical treatment for tibial shaft fractures. In patients with tibial shaft fractures, infection is an important complication as about 15% of these fractures are open injuries. Such infections may lead to devastating consequences such as increase in length of hospital stay, readmissions, prolonged medication treatment and reoperations along with high use of medical resources and costs. However, the healthcare burden among patients developing an infection in tibial shaft fracture is not well documented. Consequently, this study seeks to understand the impact of infection after intramedullary nailing in patients with tibial shaft fractures on healthcare use and cost of care.

**C. Technical Summary (Max. 200 words)<sup>§</sup>**

*§Please note: This information will be published on CPRD's website as part of its transparency policy*

The objective of this retrospective longitudinal cohort study is primarily designed to determine short (30-day, 90-day) and mid-term (one-year, two-year) healthcare resource utilization (HRU) and costs among patients with deep and superficial infections versus those without following intramedullary nailing for a tibial shaft fracture. Patients with tibial shaft fracture treated with intramedullary nailing between 2011 and 2016 will be selected. The main exposure variable will include deep infection versus superficial surgical site infection or no infection. Analyses will be both descriptive and comparative using multivariable models. The multivariable models will include generalized linear models (GLMs) based on the outcome variable of interest for HRU and costs and will adjust for patient characteristics.

**Applicants must complete all sections listed below  
Sections which do not apply should be completed as 'Not Applicable'**

**D. Objectives, Specific Aims and Rationale**

Broad Research Objectives

To evaluate the impact of developing infection in patients with intramedullary nailing for tibial shaft fractures on healthcare utilization and cost of care.

Specific Aims

1. To determine short (30-day, 90-day) and mid-term (one-year, two-year) Costs and HRU among patients with deep infection and superficial infections versus patients without an infection following tibial shaft fracture treated with nailing.

Rationale

This study seeks to understand the impact of post-surgical infection in patients with intramedullary nailing for tibial shaft fractures on cost of care and healthcare utilization.

**E. Study Background**

Infections remains a feared complication in orthopaedic and trauma surgery due to its potentially devastating consequences for patients. It has also been associated with an increase in medical resource utilization and treatment costs due to increased length of hospital stay, readmissions, prolonged pharmacological treatment and reoperations.<sup>1-6</sup> Deep infections defined as infections involving deeper tissues such as muscular fascia and bone<sup>7</sup> have been associated with a significant economic burden for healthcare systems. Data from long bone fracture reduction, hip replacement or hemiarthroplasty or screw fixation for proximal humeral fractures and knee arthroplasty, consistently reported 2-3 times higher treatment costs for patients that developed an infection compared to those that did not.<sup>1-6</sup>

Tibial shaft fractures are the most common long bone fracture of the lower limbs.<sup>8</sup> In patients with tibial shaft fractures, infection is an important complication as about 15% of these fractures are open injuries. Infection may lead to prolonged treatment, compromised clinical outcomes and in some cases, even limb amputation.<sup>9-12</sup> In the European setting there is limited data available with respect to the actual cost of treatment. In a Danish study on patients with open tibia fractures treated with a free flap, the presence of an infection increased the mean length of hospital stay from 28 to 63.8 days and the mean treatment costs from €49,301 to €67,958 for infected compared to uninfected fractures.<sup>13</sup> A study from the UK reported the mean length of stay and treatment costs of patients with tibial osteomyelitis. For patients treated with limb salvage procedures alone, length of stay was 15 days (10-27) and corresponding treatment costs were € 16,718 while for patients, whose treatment ended up in amputation length of stay was 13 days (8-17) and treatment costs were €18,441.<sup>14</sup>

Intramedullary nailing is the preferred surgical treatment in patients with tibial shaft fractures. The impact of the development of an infection on short and mid-term post-operative medical resource utilization is not well documented. While literature from clinical trials provides some insight into infection incidence rates, the treatment pathway and treatment success/failure rates, there is a lack of detailed patient-level information particularly in relation to the actual costs of care.

**Applicants must complete all sections listed below  
Sections which do not apply should be completed as 'Not Applicable'**

**F. Study Type**

Hypothesis generating

This study will generate the hypothesis for HRU and costs between patients with (deep and superficial) and without infection after intramedullary nailing for tibial shaft fractures

**G. Study Design**

This is a retrospective cohort study with a longitudinal follow-up for up to two years post intramedullary nailing for tibial shaft fractures.

**H. Feasibility counts**

Based on the preliminary feasibility study of Hospital Episode Statistics (HES) inpatient data for research grade patients with complete data, we identified a total of 11,329 patients with intramedullary nailing for a tibial shaft fracture between 2011 and 2013 of which 509 patients had an infection following intramedullary nailing for a tibial shaft fracture.

**I. Sample size considerations**

No prior real-world studies have been conducted to evaluate the health care resource use and costs of interest among patients with and without infection following intramedullary nailing for tibial shaft fracture. Therefore, it is not possible to estimate the sample size

**J. Data Linkage Required (if applicable):<sup>§</sup>**

<sup>§</sup>Please note that the data linkage/s requested in research protocols will be published by the CPRD as part of its transparency policy

The Clinical Practice Research Datalink (CPRD) with HES is required to identify the patients and outcomes that are based on diagnosis and procedures recorded in the inpatient setting.

**K. Study population**

Patients initially selected for tibial shaft fracture (ICD-10, S822) must meet all the following inclusion criteria:

1. Procedure for intramedullary nailing for tibial shaft fracture (appendix) between January 1, 2011 and February 30, 2016
  - Date of first intramedullary nailing for tibial shaft fracture between January 2011 and February 2016 will be the index date
2. Research grade patients with complete medical records for at least 12 months pre- and 30- day post index date. Patients with 90-day, 1- and 2- year follow-up or continuous enrollment will be further analysed.

**Patients with the following criteria were excluded:**

1. Records for intramedullary nailing for tibial shaft fracture during the 12-month pre-index period
2. Records for treatment with internal fixation (appendix) during the 12-month pre-index period

**Applicants must complete all sections listed below**  
**Sections which do not apply should be completed as 'Not Applicable'**

3. Records for treatment with external fixation (appendix) from 12-month pre-index to 6 weeks pre-index. Records for external fixation during 6 weeks pre-index will be included as external fixation is often performed prior to intramedullary nailing.
4. Records for severe multiple injuries to different parts of the body (polytrauma) (appendix) in the 12-month pre-index period.
5. Records for a fracture in neoplastic disease (appendix) in the 12-month pre-index period.

**L. Selection of comparison group(s) or controls**

Patients not developing an infection anytime during the study period will be selected as the control group.

**M. Exposures, Health Outcomes<sup>§</sup> and Covariates**

*§Please note: Summary information on health outcomes (as included on the ISAC application form above) will be published on CPRD's website as part of its transparency policy*

Exposure

Patients developing infection during the 12-month post index period.

Outcome(s)

Primary Outcome

One- year inpatient costs

Secondary Outcomes

- Number of hospital readmissions (in 30-days, 90-days, 1 year and 2 years)
- Percent (yes/no) of patients with readmissions (in 30-days, 90-days, 1 year and 2 years)
- Total cost of care at the different time points (in 30-days, 90-days, 1 year and 2 years)
  - a. Inpatient admissions
  - b. Outpatient costs
  - c. Pharmacy

Costs will be expressed in UK pounds and adjusted for inflation to 2015 index. Healthcare costs will be obtained from the Personal Social Services Research Unit (PSSRU) 2015 Cost of Care public document and Healthcare Resource Group (HRG) codes available in HES. Drug costs will be obtained from British National Formulary 71 (March 2016-September 2016).

- Number of procedures for introduction of therapeutic substance (Appendix) (30-days, 90-days, 1 year and 2 years)
- Number of outpatient visits (all-cause) at the different time points (in 30-days, 90-days, 1 year and 2 years)
- Number of diagnostic tests and imaging (all-cause) at the different time points (in 30-days, 90-days, 1 year and 2 years)
- Number of days in ICU (all-cause) at the different time points (in 30-days, 90-days, 1 year and 2 years)
- Time of infection and type of infection (bacterial vs other )

**Applicants must complete all sections listed below  
Sections which do not apply should be completed as 'Not Applicable'**

- Percent (yes/no) of patients with use of antibiotics at the different time points (in 30-days, 90-days, 1 year and 2 years)
- Patients necessitated amputation (Appendix) at the different time points (in 30-days, 90-days, 1 year and 2 years)

Covariates

The covariates information will be captured during 12-month pre-index period and will include the following:

*Patient Demographics*

- Age
- Gender
- Smoking status

*Procedural Characteristics*

- Year of the index date

*Patient Clinical Characteristics*

Comorbidities (Appendix)

- Diabetes
- Dyspnea
- Ventilator requirement
- Chronic obstructive pulmonary disease (COPD)
- Congestive heart failure (CHF)
- Renal failure
- Hypertension

Indices

- Charlson comorbidity index (CCI) - The CCI is an aggregate measure of comorbidity created by using select diagnoses associated with chronic disease (e.g., heart disease, cancer). The CCI includes 17 medical conditions and weights these conditions from +1 to +6.

Medications

- Anti-hypertensive medications
- Opioids

**N. Data/ Statistical Analysis**

All study variables will be analyzed descriptively. Frequency counts and proportions will be provided for dichotomous and polychotomous variables. Means, medians, and standard deviations will be provided for continuous variables. Time to infection will be depicted graphically using Kaplan-Meier curve.

Unadjusted comparisons of patient demographics, comorbidities and medication use between groups (with and without infection) will be performed with 2-sample t-tests for continuous variables and  $\chi^2$  tests for categorical variables and Wilcoxon rank sum tests for cost variables.

**Applicants must complete all sections listed below  
Sections which do not apply should be completed as 'Not Applicable'**

A sub-analysis will be conducted in which patients will be stratified by an open fracture and a closed tibial shaft fracture (appendix) to determine the outcomes.

All analyses will be conducted using SAS for Windows. Statistical significance will be set a-priori at  $p < 0.05$  (two-sided).

In addition, a generalized Linear Model (GLM) will be utilized to get adjusted results after control for confounding. Details of this methods are mentioned in the section below:

**O. Plan for addressing confounding**

Multivariable models will be constructed to examine the impact of infection versus no infection and other patient characteristics for healthcare utilization and cost outcomes. A Generalized Linear Model (GLM) will be utilized and the appropriate error distribution and link function will be used based on the outcome variable of interest for utilization and costs.

Following standard procedures, for each model regression diagnostics will be performed to assess goodness of fit and violations of model assumptions. Appropriate modifications will be made as needed either through selection of alternative error distributions or link functions, or through transformations of either the independent or dependent variables. We will also examine the fitted and the observed data to uncover outliers, their effect on the analysis, and possible misspecification of the initial equation.

**P. Plans for addressing missing data**

Missing data will not be imputed for the analyses. Most variables (drugs, procedures, diagnosis) can have no missing values, as they are assumed not to have occurred unless a record is identified. To be included in the study, patients will need to have complete medical history for at least 12 months pre-index to 12 months post-index date.

**Q. Patient or user group involvement (if applicable)**

This is purely an observational study using CPRD with HES linkage data. This study does not involve requesting additional information from GPs. Also, the study does not require contacting patients to get any additional information.

**R. Plans for disseminating and communicating study results, including the presence or absence of any restrictions on the extent and timing of publication**

The study will be disseminated per the ICMJE guidelines. We plan on submitting the results to a peer-reviewed journal and presenting the results at scientific conferences.

**S. Limitations of the study design, data sources, and analytic methods**

**Applicants must complete all sections listed below**  
**Sections which do not apply should be completed as 'Not Applicable'**

- Potential bias in patient population: only patients with complete medical history for 12 months post index will be included, thus excluding very severe patients with less than 12 month life expectancy
- Coding errors and misclassifications
- Under-reported or missing diagnoses, based on patients' choice (not to seek care) or access challenges
- Identify pharmacy cost in terms of medication prescribed in the primary care setting only
- Cost evaluated using PSSRU, HRG and BNF codes as the costs are not directly available in the data

**T. References**

1. de Lissovoy G, Fraeman K, Hutchins V, et al. Surgical site infection: incidence and impact on hospital utilization and treatment costs. *American journal of infection control* 2009;**37**(5):387-97.
2. Jenks PJ, Laurent M, McQuarry S, et al. Clinical and economic burden of surgical site infection (SSI) and predicted financial consequences of elimination of SSI from an English hospital. *The Journal of hospital infection* 2014;**86**(1):24-33.
3. Pollard TC, Newman JE, Barlow NJ, et al. Deep wound infection after proximal femoral fracture: consequences and costs. *The Journal of hospital infection* 2006;**63**(2):133-9.
4. Schmidt A, Benard S, Cyr S. Hospital Cost of Staphylococcal Infection after Cardiothoracic or Orthopedic Operations in France: A Retrospective Database Analysis. *Surgical infections* 2015;**16**(4):428-35.
5. Thakore RV, Greenberg SE, Shi H, et al. Surgical site infection in orthopedic trauma: A case-control study evaluating risk factors and cost. *Journal of clinical orthopaedics and trauma* 2015;**6**(4):220-6.
6. Wijeratna MD, McRoberts J, Porteous MJ. Cost of infection after surgery for intracapsular fracture of the femoral neck. *Annals of the Royal College of Surgeons of England* 2015;**97**(4):283-6.
7. Metsemakers WJ, Handojo K, Reynders P, et al. Individual risk factors for deep infection and compromised fracture healing after intramedullary nailing of tibial shaft fractures: a single centre experience of 480 patients. *Injury* 2015;**46**(4):740-5.
8. Minhas SV, Ho BS, Switaj PJ, et al. A comparison of 30-day complications following plate fixation versus intramedullary nailing of closed extra-articular tibia fractures. *Injury* 2015;**46**(4):734-9.
9. Buckley RE, Colton C. Infection. *Secondary Infection* 2012.  
[https://www2.aofoundation.org/wps/portal/surgery?showPage=redfix&bone=Tibia&segment=Shaft&classification=42-Special%20considerations&treatment=&method=Special%20considerations&implantstype=Complications&approach=&redfix\\_url=1341319024234](https://www2.aofoundation.org/wps/portal/surgery?showPage=redfix&bone=Tibia&segment=Shaft&classification=42-Special%20considerations&treatment=&method=Special%20considerations&implantstype=Complications&approach=&redfix_url=1341319024234).
10. Hannigan GD, Pulos N, Grice EA, et al. Current Concepts and Ongoing Research in the Prevention and Treatment of Open Fracture Infections. *Advances in wound care* 2015;**4**(1):59-74.
11. Kanakaris NK, Tosounidis TH, Giannoudis PV. Surgical management of infected non-unions: An update. *Injury* 2015;**46 Suppl 5**:S25-32.
12. Mouzopoulos G, Kanakaris NK, Kontakis G, et al. Management of bone infections in adults: the surgeon's and microbiologist's perspectives. *Injury* 2011;**42 Suppl 5**:S18-23.
13. The cost of infection in severe open tibial fractures treated with a free flap. 34th Annual Meeting of the European Bone & Joint Infection Society; 2015; Lisbon, Portugal.
14. Kendall J, Jones, S., McNally, M. Income and costs of treating tibial osteomyelitis in the uk – a comparison of limb salvage versus amputation. 34th Annual Meeting of the European Bone & Joint Infection Society. Lisbon, Portugal, 2015.

**List of Appendices** (Submit all appendices as separate documents to this application)

**Applicants must complete all sections listed below  
Sections which do not apply should be completed as 'Not Applicable'**

- Appendix 1: OPCS-4 codes to identify intramedullary nailing for long bones  
 Appendix 2 OPCS-4 codes to identify internal fixation  
 Appendix 3 OPCS-4 codes to identify external fixation  
 Appendix 4: ICD-10 codes to identify severe multiple injuries  
 Appendix 5: Read codes to identify fracture due to neoplastic disease  
 Appendix 6: ICD-10, OPCS and Read codes to identify infection  
 Appendix 7: OPCS-4 codes to identify procedures for introduction of therapeutic substance  
 Appendix 8: OPCS-4 codes to identify procedures amputation of tibia bone  
 Appendix 9: Read codes to identify diabetes mellitus with and without complications  
 Appendix 10: Read codes to identify dyspnoea  
 Appendix 11: Read codes to identify ventilator requirement  
 Appendix 12: Read codes to identify COPD  
 Appendix 13: Read codes to identify heart failure  
 Appendix 14: Read codes to identify renal failure  
 Appendix 15: Read codes to identify hypertension  
 Appendix 16: Read, ICD-10 and OPCS codes to identify open and closed tibial shaft fracture  
 Appendix 17: Read codes to identify Charlson comorbidity index  
 Appendix 18: OPCS codes to identify reoperations

1. OPCS-4 codes to identify intramedullary nailing for long bones

| OPCS-4 | Description                                                                       |
|--------|-----------------------------------------------------------------------------------|
| W192   | Primary open reduction of fracture of long bone and fixation using rigid nail NEC |
| W242   | Closed reduction of fracture of long bone and rigid internal fixation NEC         |

2. OPCS-4 codes to identify internal fixation

| OPCS-4 | Description                                                                            |
|--------|----------------------------------------------------------------------------------------|
| O172   | Remanipulation of fracture of long bone and rigid internal fixation NEC                |
| O173   | Remanipulation of fracture of long bone and flexible internal fixation HFQ             |
| O175   | Remanipulation of fragment of bone and fixation using screw                            |
| O178   | Other specified secondary closed reduction of fracture of bone and internal fixation   |
| O179   | Unspecified secondary closed reduction of fracture of bone and internal fixation       |
| W195   | Primary open reduction of fragment of bone and fixation using screw                    |
| W196   | Primary open reduction of fragment of bone and fixation using wire system              |
| W198   | Other specified primary open reduction of fracture of bone and intramedullary fixation |
| W199   | Unspecified primary open reduction of fracture of bone and intramedullary fixation     |



| OPCS-4 | Description                                                                                 |
|--------|---------------------------------------------------------------------------------------------|
| W201   | Primary open reduction of fracture of long bone and extramedullary fixation using plate NEC |
| W202   | Primary open reduction of fracture of long bone and extramedullary fixation using cerclage  |
| W203   | Primary open reduction of fracture of long bone and extramedullary fixation using suture    |
| W204   | Primary open reduction of fracture of long bone and complex extramedullary fixation NEC     |
| W208   | Other specified primary open reduction of fracture of bone and extramedullary fixation      |
| W209   | Unspecified primary open reduction of fracture of bone and extramedullary fixation          |
| W231   | Secondary open reduction of fracture of bone and intramedullary fixation HFQ                |
| W232   | Secondary open reduction of fracture of bone and extramedullary fixation HFQ                |
| W236   | Secondary open reduction of fracture of bone and internal fixation HFQ                      |
| W248   | Other specified closed reduction of fracture of bone and internal fixation                  |
| W249   | Unspecified closed reduction of fracture of bone and internal fixation                      |
| W281   | Application of internal fixation to bone NEC                                                |
| W282   | Adjustment to internal fixation of bone NEC                                                 |
| W283   | Removal of internal fixation from bone NEC                                                  |
| W288   | Other specified other internal fixation of bone                                             |
| W289   | Unspecified other internal fixation of bone                                                 |

### 3. OPCS-4 codes to identify external fixation

| OPCS-4 | Description                                                                       |
|--------|-----------------------------------------------------------------------------------|
| W222   | Primary open reduction of fracture of bone and external fixation HFQ              |
| W235   | Secondary open reduction of fracture of bone and external fixation HFQ            |
| W252   | Closed reduction of fracture of bone and fixation using functional bracing system |
| W253   | Remanipulation of fracture of bone and external fixation HFQ                      |
| W258   | Other specified closed reduction of fracture of bone and external fixation        |
| W259   | Unspecified closed reduction of fracture of bone and external fixation            |
| W301   | Application of external fixation to bone NEC                                      |
| W302   | Adjustment to external fixation of bone NEC                                       |
| W303   | Removal of external fixation from bone NEC                                        |
| W304   | Application of external ring fixation to bone NEC                                 |
| W308   | Other specified other external fixation of bone                                   |
| W309   | Unspecified other external fixation of bone                                       |

## 4. ICD-10 codes to identify severe multiple injuries

| ICD-10 codes | Description                                                  |
|--------------|--------------------------------------------------------------|
| S097         | Multiple injuries of head                                    |
| S197         | Multiple injuries of neck                                    |
| S277         | Multiple injuries of intrathoracic organs                    |
| S297         | Multiple injuries of thorax                                  |
| S397         | Other multiple injuries of abdomen, lower back and pelvis    |
| S497         | Multiple injuries of shoulder and upper arm                  |
| S597         | Multiple injuries of forearm                                 |
| S647         | Injury of multiple nerves at wrist and hand level            |
| S697         | Multiple injuries of wrist and hand                          |
| S797         | Multiple injuries of hip and thigh                           |
| S897         | Multiple injuries of lower leg                               |
| S997         | Multiple injuries of ankle and foot                          |
| T042         | Crushing injuries involving multiple region of upper limb(s) |
| T043         | Crushing injuries involving multiple region of lower limb(s) |
| T062         | Injuries of nerves involving multiple body regions           |
| T063         | Injuries of blood vessels involving multiple body regions    |
| T068         | Other specified injuries involving multiple body regions     |
| T07X         | Unspecified multiple injuries                                |

## 5. Read codes to identify fracture due to neoplastic disease

| Medcode | Read_code | Description                            |
|---------|-----------|----------------------------------------|
| 54834   | N331700   | Fracture of bone in neoplastic disease |

## 6. ICD-10, OPCS and Read codes to identify infection

| ICD-10 codes | Description                                                  | Deep/Superficial |
|--------------|--------------------------------------------------------------|------------------|
| A498         | Other bacterial infections of unspecified site               | Deep             |
| A499         | Bacterial infection, unspecified                             | Deep             |
| A544         | Gonococcal infection of musculoskeletal system               | Deep             |
| L088         | Other spec local infections of skin and subcutaneous tissue  | Superficial      |
| L089         | Local infection of skin and subcutaneous tissue, unspecified | Superficial      |
| T814         | Infection following a procedure, not elsewhere classified    | Deep             |

| Medcode | Read_code | Description                                                  | Deep/Superficial |
|---------|-----------|--------------------------------------------------------------|------------------|
| 3128    | M07z.00   | Local infection skin/subcut tissue NOS                       | Superficial      |
| 6956    | SK03.00   | Post-traumatic wound infection NEC                           | Deep             |
| 7155    | N302.11   | Bone infection                                               | Deep             |
| 51854   | SP25600   | Postoperative wound infection-deep                           | Deep             |
| 20342   | N30..00   | Osteomyelitis, periostitis, other infections affecting bone  | Deep             |
| 21073   | M07y.00   | Local infection of skin or subcutaneous tissue OS            | Superficial      |
| 25363   | SP06800   | Infection and inflamm reac due inter ortho device            | Deep             |
| 40293   | SP06.00   | Infection and inflammation due to internal prosthetic device | Deep             |
| 30381   | SP05612   | [X]Prosthetic infection                                      | Deep             |
| 33381   | A3Byz00   | Other specified bacterial infection NOS                      | Superficial      |
| 43058   | N30z.00   | Bone infection NOS                                           | Deep             |
| 39830   | N300.12   | Acute bone infection                                         | Deep             |
| 40293   | SP06.00   | Infection and inflammation due to internal prosthetic device | Deep             |
| 52122   | Myu0.00   | [X]Infections of the skin and subcutaneous tissue            | Superficial      |
| 69280   | N30z600   | Bone infection NOS, of the lower leg                         | Deep             |
| 69855   | N30y600   | Other infections involving bone, of the lower leg            | Deep             |
| 4207    | M03z000   | Cellulitis NOS                                               | Superficial      |

| OPCS-4 | Description                          | Deep/Superficial |
|--------|--------------------------------------|------------------|
| S571   | Debridement of skin NEC              | Superficial      |
| W332   | Debridement of open fracture of bone | Deep             |
| T963   | Debridement of soft tissue NEC       | Deep             |
| W336   | Debridement of bone NEC              | Deep             |

7. OPCS-4 codes to identify procedures for debridement or introduction of therapeutic substance

| OPCS-4 | Description                          |
|--------|--------------------------------------|
| S571   | Debridement of skin NEC              |
| W332   | Debridement of open fracture of bone |
| T963   | Debridement of soft tissue NEC       |

|      |                                                                 |
|------|-----------------------------------------------------------------|
| W336 | Debridement of bone NEC                                         |
| W283 | Removal of internal fixation from bone NEC                      |
| X292 | Continuous intravenous infusion of therapeutic substance NEC    |
| S523 | Insertion of therapeutic substance into subcutaneous tissue NEC |
| W351 | Introduction of therapeutic substance into bone                 |

## 8. OPCS-4 codes to identify procedures amputation of tibia bone

| OPCS-4 | Description                       |
|--------|-----------------------------------|
| X094   | Amputation of leg through knee    |
| X095   | Amputation of leg below knee      |
| X098   | Other specified amputation of leg |
| X099   | Unspecified amputation of leg     |

## 9. Read codes to identify diabetes mellitus with and without complications

| Medcodes | Read code | Description                                                  |
|----------|-----------|--------------------------------------------------------------|
| 231370   | 66AJ.11   | Unstable diabetes                                            |
| 297735   | C108600   | Insulin dependent diabetes mellitus with gangrene            |
| 288454   | C101100   | Diabetes mellitus, adult onset, with ketoacidosis            |
| 344495   | C10M.00   | Lipoatrophic diabetes mellitus                               |
| 224500   | C103000   | Diabetes mellitus, juvenile type, with ketoacidotic coma     |
| 233608   | C109500   | Non-insulin dependent diabetes mellitus with gangrene        |
| 251808   | C109900   | Non-insulin-dependent diabetes mellitus without complication |
| 331810   | C109412   | Type 2 diabetes mellitus with ulcer                          |
| 344028   | C10FG00   | Type 2 diabetes mellitus with arthropathy                    |
| 279344   | C109.11   | NIDDM - Non-insulin dependent diabetes mellitus              |
| 343531   | C109G11   | Type II diabetes mellitus with arthropathy                   |
| 279348   | C10z.00   | Diabetes mellitus with unspecified complication              |
| 342740   | C10EM11   | Type I diabetes mellitus with ketoacidosis                   |
| 279343   | C107200   | Diabetes mellitus, adult with gangrene                       |
| 210870   | 250 GA    | Gangrene diabetic                                            |
| 339961   | C10FJ00   | Insulin treated Type 2 diabetes mellitus                     |
| 308067   | C108911   | Type I diabetes mellitus maturity onset                      |
| 297727   | C102z00   | Diabetes mellitus NOS with hyperosmolar coma                 |
| 283820   | 250 HC    | Hypoglycaemic Coma Diabetic                                  |
| 303253   | 250 AK    | Maturity Onset Diabetes Mellitus Insulin                     |
| 243302   | G73y000   | Diabetic Peripheral Angiopathy                               |

| Medcodes | Read code | Description                                                 |
|----------|-----------|-------------------------------------------------------------|
| 306131   | 250 E     | Hypoglycaemia In Diabetes Mellitus                          |
| 249566   | 66AJ.00   | Diabetic - Poor Control                                     |
| 331925   | C109J12   | Insulin treated Type II diabetes mellitus                   |
| 309010   | C109F12   | Type 2 diabetes mellitus with peripheral angiopathy         |
| 242649   | C109300   | Non-insulin-dependent diabetes mellitus with multiple comps |
| 242646   | C108400   | Unstable insulin dependent diabetes mellitus                |
| 340367   | C10F900   | Type 2 diabetes mellitus without complication               |
| 206461   | C10y.00   | Diabetes mellitus with other specified manifestation        |
| 344412   | C10F.11   | Type II diabetes mellitus                                   |
| 341116   | C10FL00   | Type 2 diabetes mellitus with persistent proteinuria        |
| 306134   | 250 NT    | UNSTABLE DIABETIC                                           |
| 309704   | C109G00   | Non-insulin dependent diabetes mellitus with arthropathy    |
| 343565   | C109G12   | Type 2 diabetes mellitus with arthropathy                   |
| 249564   | 66A5.00   | Diabetic on insulin                                         |
| 308094   | C109511   | Type II diabetes mellitus with gangrene                     |
| 243795   | L180600   | Pre-existing diabetes mellitus, non-insulin-dependent       |
| 256384   | 250 PR    | Pruritus Diabetic                                           |
| 341003   | C10FN00   | Type 2 diabetes mellitus with ketoacidosis                  |
| 341356   | C10E400   | Unstable type 1 diabetes mellitus                           |
| 270277   | C10zy00   | Other specified diabetes mellitus with unspecified comps    |
| 341680   | C10D.00   | Diabetes mellitus autosomal dominant type 2                 |
| 288459   | C107z00   | Diabetes mellitus NOS with peripheral circulatory disorder  |
| 341002   | C10EN00   | Type 1 diabetes mellitus with ketoacidotic coma             |
| 303258   | 250 CT    | Diabetic Cataract                                           |
| 215438   | C101000   | Diabetes mellitus, juvenile type, with ketoacidosis         |
| 206451   | C100011   | Insulin dependent diabetes mellitus                         |
| 229069   | 250 JA    | Diabetic Acidosis                                           |
| 309863   | C108411   | Unstable type I diabetes mellitus                           |
| 303250   | 250 A     | Sugar Diabetes                                              |
| 206452   | C103.00   | Diabetes mellitus with ketoacidotic coma                    |
| 261004   | C107.11   | Diabetes mellitus with gangrene                             |
| 303263   | 250 JL    | Ketosis Diabetic                                            |
| 303256   | 250 AN    | Diabetes                                                    |
| 341598   | C10E500   | Type 1 diabetes mellitus with ulcer                         |

| Medcodes | Read code | Description                                                |
|----------|-----------|------------------------------------------------------------|
| 242650   | C109400   | Non-insulin dependent diabetes mellitus with ulcer         |
| 297739   | C10yy00   | Other specified diabetes mellitus with other spec comps    |
| 292948   | 250 AB    | Abscess Diabetic                                           |
| 307957   | C109711   | Type II diabetes mellitus - poor control                   |
| 261009   | C10A000   | Malnutrition-related diabetes mellitus with coma           |
| 339633   | C10F.00   | Type 2 diabetes mellitus                                   |
| 309658   | C109J11   | Insulin treated non-insulin dependent diabetes mellitus    |
| 223592   | 8A13.00   | Diabetic stabilisation                                     |
| 233607   | C108.00   | Insulin dependent diabetes mellitus                        |
| 347683   | C10EG00   | Type 1 diabetes mellitus with peripheral angiopathy        |
| 340865   | C108E12   | Type 1 diabetes mellitus with hypoglycaemic coma           |
| 302787   | C108.13   | Type I diabetes mellitus                                   |
| 270271   | C107100   | Diabetes mellitus, adult, peripheral circulatory disorder  |
| 233609   | C10A100   | Malnutrition-related diabetes mellitus with ketoacidosis   |
| 261001   | C102000   | Diabetes mellitus, juvenile type, with hyperosmolar coma   |
| 237987   | 250 AT    | Diabetic Amyotrophy                                        |
| 308119   | C109411   | Type II diabetes mellitus with ulcer                       |
| 341509   | C10F500   | Type 2 diabetes mellitus with gangrene                     |
| 303262   | 250 JK    | Ketoacidosis Diabetic                                      |
| 297726   | C102100   | Diabetes mellitus, adult onset, with hyperosmolar coma     |
| 308004   | C108E11   | Type I diabetes mellitus with hypoglycaemic coma           |
| 339527   | C109K00   | Hyperosmolar non-ketotic state in type 2 diabetes mellitus |
| 247153   | 250 G     | Ulcer Diabetic                                             |
| 258769   | 66AJz00   | Diabetic - poor control NOS                                |
| 347258   | C10FJ11   | Insulin treated Type II diabetes mellitus                  |
| 297734   | C108500   | Insulin dependent diabetes mellitus with ulcer             |
| 309300   | C109J00   | Insulin treated Type 2 diabetes mellitus                   |
| 341126   | C10E800   | Type 1 diabetes mellitus - poor control                    |
| 309125   | C108812   | Type 1 diabetes mellitus - poor control                    |
| 206454   | C107400   | NIDDM with peripheral circulatory disorder                 |
| 343055   | C10G.00   | Secondary pancreatic diabetes mellitus                     |
| 340580   | C10EM00   | Type 1 diabetes mellitus with ketoacidosis                 |
| 331540   | 66AV.00   | Diabetic on insulin and oral treatment                     |
| 298869   | L180500   | Pre-existing diabetes mellitus, insulin-dependent          |

| Medcodes | Read code | Description                                                 |
|----------|-----------|-------------------------------------------------------------|
| 342313   | C10FP00   | Type 2 diabetes mellitus with ketoacidotic coma             |
| 297725   | C100.00   | Diabetes mellitus with no mention of complication           |
| 344338   | C10E600   | Type 1 diabetes mellitus with gangrene                      |
| 333576   | C109D12   | Type 2 diabetes mellitus with hypoglycaemic coma            |
| 341127   | C10FF00   | Type 2 diabetes mellitus with peripheral angiopathy         |
| 261005   | C108.12   | Type 1 diabetes mellitus                                    |
| 206457   | C109.00   | Non-insulin-dependent diabetes mellitus                     |
| 331823   | C109D00   | Non-insulin dependent diabetes mellitus with hypoglyca coma |
| 242656   | C10zz00   | Diabetes mellitus NOS with unspecified complication         |
| 340814   | C10EE00   | Type 1 diabetes mellitus with hypoglycaemic coma            |
| 295382   | 66AS.00   | Diabetic annual review                                      |
| 233606   | C107000   | Diabetes mellitus, juvenile ??? circulatory disorder        |
| 347648   | C10E412   | Unstable insulin dependent diabetes mellitus                |
| 341139   | C10E900   | Type 1 diabetes mellitus maturity onset                     |
| 242642   | C101y00   | Other specified diabetes mellitus with ketoacidosis         |
| 344989   | C10FL11   | Type II diabetes mellitus with persistent proteinuria       |
| 247152   | 250 DR    | Diabetic Diarrhoea                                          |
| 283822   | 250 NH    | Hyperosmolar Diabetic State                                 |
| 303259   | 250 DC    | Dietary Control Diabetes                                    |
| 310005   | C109712   | Type 2 diabetes mellitus - poor control                     |
| 270372   | Cyu2.00   | [X]Diabetes mellitus                                        |
| 270268   | C10..00   | Diabetes mellitus                                           |
| 346131   | C10EA00   | Type 1 diabetes mellitus without complication               |
| 279341   | C100z00   | Diabetes mellitus NOS with no mention of complication       |
| 297729   | C103z00   | Diabetes mellitus NOS with ketoacidotic coma                |
| 331809   | C108G00   | Insulin dependent diab mell with peripheral angiopathy      |
| 308089   | C108E00   | Insulin dependent diabetes mellitus with hypoglycaemic coma |
| 215437   | C101.00   | Diabetes mellitus with ketoacidosis                         |
| 347882   | C10E812   | Insulin dependent diabetes mellitus - poor control          |
| 341302   | C10F700   | Type 2 diabetes mellitus - poor control                     |
| 222266   | 66AK.00   | Diabetic - cooperative patient                              |
| 270276   | C10B000   | Steroid induced diabetes mellitus without complication      |
| 233603   | C100111   | Maturity onset diabetes                                     |
| 339632   | C10E.00   | Type 1 diabetes mellitus                                    |

| Medcodes | Read code | Description                                                |
|----------|-----------|------------------------------------------------------------|
| 223655   | 8H2J.00   | Admit diabetic emergency                                   |
| 283823   | 2500AH    | Latent Diabetes                                            |
| 285267   | 1434      | H/O: diabetes mellitus                                     |
| 308820   | C108811   | Type I diabetes mellitus - poor control                    |
| 344076   | C10E.12   | Insulin dependent diabetes mellitus                        |
| 270269   | C100100   | Diabetes mellitus, adult onset, no mention of complication |
| 341357   | C10F400   | Type 2 diabetes mellitus with ulcer                        |
| 242655   | C10z100   | Diabetes mellitus, adult onset, unspecified complication   |
| 280482   | L180X00   | Pre-existing diabetes mellitus, unspecified                |
| 341557   | 8BL2.00   | Patient on maximal tolerated therapy for diabetes          |
| 242653   | C10yz00   | Diabetes mellitus NOS with other specified manifestation   |
| 288455   | C102.00   | Diabetes mellitus with hyperosmolar coma                   |
| 270275   | C10A.00   | Malnutrition-related diabetes mellitus                     |
| 270273   | C108.11   | IDDM-Insulin dependent diabetes mellitus                   |
| 215439   | C101z00   | Diabetes mellitus NOS with ketoacidosis                    |
| 342317   | C10FD00   | Type 2 diabetes mellitus with hypoglycaemic coma           |
| 261007   | C108800   | Insulin dependent diabetes mellitus - poor control         |
| 303261   | 250 HP    | Precoma Diabetic                                           |
| 341856   | C10EK00   | Type 1 diabetes mellitus with persistent proteinuria       |
| 303252   | 250 AD    | Diabetes Mellitus Insulin Dependant                        |
| 347025   | C10H.00   | Diabetes mellitus induced by non-steroid drugs             |
| 270270   | C107.00   | Diabetes mellitus with peripheral circulatory disorder     |
| 332066   | C10D.11   | Maturity onset diabetes in youth type 2                    |
| 224506   | C107300   | IDDM with peripheral circulatory disorder                  |
| 340332   | C109F11   | Type II diabetes mellitus with peripheral angiopathy       |
| 309143   | C109D11   | Type II diabetes mellitus with hypoglycaemic coma          |
| 341409   | C10EL00   | Type 1 diabetes mellitus with persistent microalbuminuria  |
| 242641   | C100112   | Non-insulin dependent diabetes mellitus                    |
| 340474   | C10FM00   | Type 2 diabetes mellitus with persistent microalbuminuria  |
| 261095   | Cyu2000   | [X]Other specified diabetes mellitus                       |
| 288460   | C109.12   | Type 2 diabetes mellitus                                   |
| 224501   | C103y00   | Other specified diabetes mellitus with coma                |
| 302788   | C109.13   | Type II diabetes mellitus                                  |
| 332948   | C108511   | Type I diabetes mellitus with ulcer                        |



| Medcodes | Read code | Description                                                  |
|----------|-----------|--------------------------------------------------------------|
| 347834   | C10EN11   | Type I diabetes mellitus with ketoacidotic coma              |
| 297738   | C109700   | Non-insulin dependent diabetes mellitus - poor control       |
| 283819   | 250 H     | Coma Diabetic                                                |
| 215444   | C10y100   | Diabetes mellitus, adult, other specified manifestation      |
| 346130   | C10E.11   | Type I diabetes mellitus                                     |
| 344745   | C10N.00   | Secondary diabetes mellitus                                  |
| 347629   | C10F711   | Type II diabetes mellitus - poor control                     |
| 277055   | 66A1.00   | Diabetic - good control                                      |
| 251805   | C100000   | Diabetes mellitus, juvenile type, no mention of complication |
| 206900   | F464000   | Diabetic cataract                                            |
| 309738   | C109212   | Type 2 diabetes mellitus with neurological complications     |
| 224502   | C104000   | Diabetes mellitus, juvenile type, with renal manifestation   |
| 345097   | C109111   | Type II diabetes mellitus with ophthalmic complications      |
| 341813   | 2BBP.00   | O/E - right eye background diabetic retinopathy              |
| 346841   | C108C11   | Type I diabetes mellitus with polyneuropathy                 |
| 308934   | C108H00   | Insulin dependent diabetes mellitus with arthropathy         |
| 215442   | C109C00   | Non-insulin dependent diabetes mellitus with nephropathy     |
| 261008   | C108B00   | Insulin dependent diabetes mellitus with mononeuropathy      |
| 297732   | C106100   | Diabetes mellitus, adult onset, neurological manifestation   |
| 206455   | C108000   | Insulin-dependent diabetes mellitus with renal complications |
| 309524   | C109H00   | Non-insulin dependent d m with neuropathic arthropathy       |
| 251806   | C108200   | Insulin-dependent diabetes mellitus with neurological comps  |
| 343081   | C10F100   | Type 2 diabetes mellitus with ophthalmic complications       |
| 341814   | 2BBQ.00   | O/E - left eye background diabetic retinopathy               |
| 309275   | C109011   | Type II diabetes mellitus with renal complications           |
| 252191   | F420200   | Preproliferative diabetic retinopathy                        |
| 288456   | C105000   | Diabetes mellitus, juvenile type, ophthalmic manifestation   |
| 347472   | C10FR00   | Type 2 diabetes mellitus with gastroparesis                  |
| 288461   | C109100   | Non-insulin-dependent diabetes mellitus with ophthalm comps  |
| 306132   | 250 F     | Neuropathy Diabetic                                          |
| 341286   | C10FE00   | Type 2 diabetes mellitus with diabetic cataract              |
| 308948   | C108712   | Type 1 diabetes mellitus with retinopathy                    |
| 242643   | C106.13   | Diabetes mellitus with polyneuropathy                        |
| 279760   | F420.00   | Diabetic retinopathy                                         |

| Medcodes | Read code | Description                                                  |
|----------|-----------|--------------------------------------------------------------|
| 308463   | C109612   | Type 2 diabetes mellitus with retinopathy                    |
| 270274   | C109B00   | Non-insulin dependent diabetes mellitus with polyneuropathy  |
| 309943   | F420600   | Non proliferative diabetic retinopathy                       |
| 288457   | C105y00   | Other specified diabetes mellitus with ophthalmic complicatn |
| 309614   | C109E11   | Type II diabetes mellitus with diabetic cataract             |
| 341801   | C10FB00   | Type 2 diabetes mellitus with polyneuropathy                 |
| 340973   | C10FA00   | Type 2 diabetes mellitus with mononeuropathy                 |
| 347417   | C10F611   | Type II diabetes mellitus with retinopathy                   |
| 343003   | C10E200   | Type 1 diabetes mellitus with neurological complications     |
| 342681   | C108B11   | Type I diabetes mellitus with mononeuropathy                 |
| 206459   | C109600   | Non-insulin-dependent diabetes mellitus with retinopathy     |
| 298103   | F381300   | Myasthenic syndrome due to diabetic amyotrophy               |
| 224505   | C106z00   | Diabetes mellitus NOS with neurological manifestation        |
| 224503   | C104y00   | Other specified diabetes mellitus with renal complications   |
| 342469   | 2BBV.00   | O/E - left eye proliferative diabetic retinopathy            |
| 332953   | C108711   | Type I diabetes mellitus with retinopathy                    |
| 279761   | F420400   | Diabetic maculopathy                                         |
| 201928   | 250 LG    | Diabetic Glomerulosclerosis                                  |
| 309628   | C109C12   | Type 2 diabetes mellitus with nephropathy                    |
| 224504   | C106.11   | Diabetic amyotrophy                                          |
| 207385   | K01x111   | Kimmelstiel - Wilson disease                                 |
| 206456   | C108D00   | Insulin dependent diabetes mellitus with nephropathy         |
| 341836   | C108212   | Type 1 diabetes mellitus with neurological complications     |
| 242645   | C108100   | Insulin-dependent diabetes mellitus with ophthalmic comps    |
| 288858   | F3y0.00   | Diabetic mononeuropathy                                      |
| 252174   | F372.12   | Diabetic neuropathy                                          |
| 234015   | F420300   | Advanced diabetic maculopathy                                |
| 347410   | C10F011   | Type II diabetes mellitus with renal complications           |
| 344952   | 2BBI.00   | O/E - left eye stable treated prolif diabetic retinopathy    |
| 339960   | C10FC00   | Type 2 diabetes mellitus with nephropathy                    |
| 343345   | C10EF00   | Type 1 diabetes mellitus with diabetic cataract              |
| 308504   | C109E12   | Type 2 diabetes mellitus with diabetic cataract              |
| 309757   | C108D11   | Type I diabetes mellitus with nephropathy                    |
| 308851   | C109B11   | Type II diabetes mellitus with polyneuropathy                |

| Medcodes | Read code | Description                                                 |
|----------|-----------|-------------------------------------------------------------|
| 341264   | C10F200   | Type 2 diabetes mellitus with neurological complications    |
| 346403   | C10EB00   | Type 1 diabetes mellitus with mononeuropathy                |
| 309007   | C109H12   | Type 2 diabetes mellitus with neuropathic arthropathy       |
| 333002   | F420800   | High risk non proliferative diabetic retinopathy            |
| 242647   | C108700   | Insulin dependent diabetes mellitus with retinopathy        |
| 341800   | C10EC00   | Type 1 diabetes mellitus with polyneuropathy                |
| 219965   | 250 M     | Charcot's Diabetic Arthropathy                              |
| 261411   | F374z00   | Polyneuropathy in disease NOS                               |
| 309758   | C109112   | Type 2 diabetes mellitus with ophthalmic complications      |
| 306133   | 250 N     | Diabetic Nephropathy                                        |
| 309796   | 2BBL.00   | O/E - diabetic maculopathy present both eyes                |
| 331538   | C109012   | Type 2 diabetes mellitus with renal complications           |
| 242648   | C109000   | Non-insulin-dependent diabetes mellitus with renal comps    |
| 206458   | C109200   | Non-insulin-dependent diabetes mellitus with neuro comps    |
| 341701   | F420700   | High risk proliferative diabetic retinopathy                |
| 215440   | C106.12   | Diabetes mellitus with neuropathy                           |
| 342045   | 2BBS.00   | O/E - left eye preproliferative diabetic retinopathy        |
| 340163   | C109E00   | Non-insulin depend diabetes mellitus with diabetic cataract |
| 340357   | C10F600   | Type 2 diabetes mellitus with retinopathy                   |
| 297737   | C108C00   | Insulin dependent diabetes mellitus with polyneuropathy     |
| 336008   | C108211   | Type I diabetes mellitus with neurological complications    |
| 340987   | C10E000   | Type 1 diabetes mellitus with renal complications           |
| 310061   | C109H11   | Type II diabetes mellitus with neuropathic arthropathy      |
| 297731   | C106.00   | Diabetes mellitus with neurological manifestation           |
| 308830   | C109611   | Type II diabetes mellitus with retinopathy                  |
| 233989   | F372.11   | Diabetic polyneuropathy                                     |
| 344951   | 2BBk.00   | O/E - right eye stable treated prolif diabetic retinopathy  |
| 243072   | F420z00   | Diabetic retinopathy NOS                                    |
| 288458   | C105z00   | Diabetes mellitus NOS with ophthalmic manifestation         |
| 233604   | C105100   | Diabetes mellitus, adult onset, ophthalmic manifestation    |
| 340333   | C10ED00   | Type 1 diabetes mellitus with nephropathy                   |
| 308871   | C108F11   | Type I diabetes mellitus with diabetic cataract             |
| 331568   | C108011   | Type I diabetes mellitus with renal complications           |
| 346291   | C10FC11   | Type II diabetes mellitus with nephropathy                  |

| Medcodes | Read code | Description                                                 |
|----------|-----------|-------------------------------------------------------------|
| 340162   | C108012   | Type 1 diabetes mellitus with renal complications           |
| 340507   | C109A11   | Type II diabetes mellitus with mononeuropathy               |
| 252180   | F381311   | Diabetic amyotrophy                                         |
| 308872   | C109C11   | Type II diabetes mellitus with nephropathy                  |
| 347405   | C10EQ00   | Type 1 diabetes mellitus with gastroparesis                 |
| 279345   | C109A00   | Non-insulin dependent diabetes mellitus with mononeuropathy |
| 308715   | C108F00   | Insulin dependent diabetes mellitus with diabetic cataract  |
| 206453   | C104.11   | Diabetic nephropathy                                        |
| 342033   | 2BBR.00   | O/E - right eye preproliferative diabetic retinopathy       |
| 333621   | C108J12   | Type 1 diabetes mellitus with neuropathic arthropathy       |
| 347771   | C10FB11   | Type II diabetes mellitus with polyneuropathy               |
| 297733   | C106y00   | Other specified diabetes mellitus with neurological comps   |
| 256383   | 250 LK    | Kimmelstiel- Wilson Disease/Syndrome                        |
| 340257   | C10FH00   | Type 2 diabetes mellitus with neuropathic arthropathy       |
| 341459   | C10F000   | Type 2 diabetes mellitus with renal complications           |
| 297730   | C105.00   | Diabetes mellitus with ophthalmic manifestation             |
| 261428   | F420100   | Proliferative diabetic retinopathy                          |
| 333249   | C109211   | Type II diabetes mellitus with neurological complications   |
| 261003   | C104z00   | Diabetes mellitus with nephropathy NOS                      |
| 341221   | C10E100   | Type 1 diabetes mellitus with ophthalmic complications      |

## 10. Read codes to identify dyspnoea

| Medcode | Read_code | Description                   |
|---------|-----------|-------------------------------|
| 3092    | R060A00   | [D]Dyspnoea                   |
| 6434    | 1736.00   | Paroxysmal nocturnal dyspnoea |
| 7000    | 2322.00   | O/E - dyspnoea                |
| 18116   | 173D.00   | Nocturnal dyspnoea            |
| 53771   | 173C.11   | Dyspnoea on exertion          |

## 11. Read codes to identify ventilator requirement

| Medcode | Read_code | Description         |
|---------|-----------|---------------------|
| 87337   | 7M36300   | Ventilatory support |

## 12. Read codes to identify COPD

| Medcode | Read code | Description                                                  |
|---------|-----------|--------------------------------------------------------------|
| 1001    | H3...00   | Chronic obstructive pulmonary disease                        |
| 9520    | 66YB.00   | Chronic obstructive pulmonary disease monitoring             |
| 9876    | H38..00   | Severe chronic obstructive pulmonary disease                 |
| 10802   | H37..00   | Moderate chronic obstructive pulmonary disease               |
| 10863   | H36..00   | Mild chronic obstructive pulmonary disease                   |
| 11287   | 66YM.00   | Chronic obstructive pulmonary disease annual review          |
| 18621   | 66YL.00   | Chronic obstructive pulmonary disease follow-up              |
| 37247   | H3z..11   | Chronic obstructive pulmonary disease NOS                    |
| 45770   | 66Yg.00   | Chronic obstructive pulmonary disease disturbs sleep         |
| 45771   | 66Yh.00   | Chronic obstructive pulmonary disease does not disturb sleep |
| 65733   | Hyu3100   | [X]Other specified chronic obstructive pulmonary disease     |
| 67040   | H3y..11   | Other specified chronic obstructive pulmonary disease        |
| 93568   | H39..00   | Very severe chronic obstructive pulmonary disease            |
| 102685  | 66YB000   | Chronic obstructive pulmonary disease 3 monthly review       |
| 103007  | 66YB100   | Chronic obstructive pulmonary disease 6 monthly review       |
| 103494  | 14B3.12   | History of chronic obstructive pulmonary disease             |
| 104985  | 9NgP.00   | On chronic obstructive pulmonary disease supprtv cre pathway |
| 105457  | 8CMW500   | Chronic obstructive pulmonary disease care pathway           |

## 13. Read codes to identify heart failure

| Medcode | Read_code | Description                                                 |
|---------|-----------|-------------------------------------------------------------|
| 398     | G580.00   | Congestive heart failure                                    |
| 2062    | G58..00   | Heart failure                                               |
| 4024    | G58z.00   | Heart failure NOS                                           |
| 9913    | 1O1..00   | Heart failure confirmed                                     |
| 10079   | G580.12   | Right heart failure                                         |
| 15058   | 14A6.00   | H/O: heart failure                                          |
| 17851   | 8HBE.00   | Heart failure follow-up                                     |
| 21837   | G232.00   | Hypertensive heart&renal dis wth (congestive) heart failure |
| 23707   | G580000   | Acute congestive heart failure                              |
| 27964   | G582.00   | Acute heart failure                                         |
| 28684   | G233.00   | Hypertensive heart and renal disease with renal failure     |
| 30779   | 662W.00   | Heart failure annual review                                 |
| 32671   | G580100   | Chronic congestive heart failure                            |

| Medcode | Read_code | Description                                                 |
|---------|-----------|-------------------------------------------------------------|
| 32898   | 8H2S.00   | Admit heart failure emergency                               |
| 32911   | 9Or..00   | Heart failure monitoring administration                     |
| 32945   | 8CL3.00   | Heart failure care plan discussed with patient              |
| 46912   | 14AM.00   | H/O: Heart failure in last year                             |
| 60099   | 67D4.00   | Heart failure information given to patient                  |
| 66306   | SP11111   | Heart failure as a complication of care                     |
| 69062   | 9N6T.00   | Referred by heart failure nurse specialist                  |
| 71235   | 8Hk0.00   | Referred to heart failure education group                   |
| 83502   | 662p.00   | Heart failure 6 month review                                |
| 94870   | G580400   | Congestive heart failure due to valvular disease            |
| 96799   | G5y4z00   | Post cardiac operation heart failure NOS                    |
| 101137  | G583.11   | HFNEF - heart failure with normal ejection fraction         |
| 101138  | G583.00   | Heart failure with normal ejection fraction                 |
| 103732  | 8CMK.00   | Has heart failure management plan                           |
| 105002  | 679W100   | Education about deteriorating heart failure                 |
| 105542  | 8CeC.00   | Preferred place of care for next exacerbation heart failure |
| 106198  | 661M500   | Heart failure self-management plan agreed                   |

## 14. Read codes to identify renal failure

| Medcode | Read_code | Description                                             |
|---------|-----------|---------------------------------------------------------|
| 350     | K06..00   | Renal failure unspecified                               |
| 512     | K05..00   | Chronic renal failure                                   |
| 2266    | K04..00   | Acute renal failure                                     |
| 6712    | K050.00   | End stage renal failure                                 |
| 11554   | SP15400   | Renal failure as a complication of care                 |
| 11773   | 7L1A.11   | Dialysis for renal failure                              |
| 15945   | SK05.00   | Renal failure following crush syndrome                  |
| 16929   | D215.00   | Anaemia secondary to renal failure                      |
| 24292   | SP15412   | Post operative renal failure                            |
| 24676   | SK08.00   | Acute renal failure due to rhabdomyolysis               |
| 25394   | D215000   | Anaemia secondary to chronic renal failure              |
| 25582   | K04z.00   | Acute renal failure NOS                                 |
| 28684   | G233.00   | Hypertensive heart and renal disease with renal failure |
| 31549   | 7L1A.00   | Compensation for renal failure                          |
| 32423   | G222.00   | Hypertensive renal disease with renal failure           |

| Medcode | Read_code | Description                                                  |
|---------|-----------|--------------------------------------------------------------|
| 35235   | K04y.00   | Other acute renal failure                                    |
| 48022   | 7L1Ay00   | Other specified compensation for renal failure               |
| 53852   | K05..12   | End stage renal failure                                      |
| 53940   | Kyu2100   | [X]Other chronic renal failure                               |
| 53945   | Kyu2000   | [X]Other acute renal failure                                 |
| 56760   | 7L1B.00   | Placement ambulatory apparatus compensation renal failure    |
| 57919   | K043.00   | Acute drug-induced renal failure                             |
| 59194   | 7L1By00   | Placement ambulatory apparatus- compensate renal failure OS  |
| 61930   | Kyu2.00   | [X]Renal failure                                             |
| 63277   | L393.00   | Acute renal failure following labour and delivery            |
| 63760   | SK05.11   | Renal failure after crushing                                 |
| 64636   | 7L1Az00   | Compensation for renal failure NOS                           |
| 65089   | 7L1Cz00   | Placement other apparatus- compensate for renal failure NOS  |
| 71314   | L093.00   | Renal failure following abortive pregnancy                   |
| 72458   | L393000   | Post-delivery acute renal failure unspecified                |
| 83513   | 7L1C.00   | Placement other apparatus for compensation for renal failure |
| 96179   | L393100   | Post-delivery acute renal failure - delivered with p/n prob  |
| 97198   | K044.00   | Acute renal failure due to urinary obstruction               |
| 100205  | K0E..00   | Acute-on-chronic renal failure                               |
| 101666  | L070300   | Unspecified abortion with renal failure                      |
| 104857  | K043000   | Acute renal failure due to ACE inhibitor                     |
| 105209  | K045.00   | Acute renal failure due to non-traumatic rhabdomyolysis      |
| 105267  | K04B.00   | Acute renal failure due to traumatic rhabdomyolysis          |
| 105739  | K04..11   | ARF - Acute renal failure                                    |
| 106860  | C353600   | Renal failure-associated hyperphosphataemia                  |
| 107241  | K043400   | Acute renal failure induced by non-steroid anti-inflamm drug |

## 15. Read codes to identify hypertension

| Medcode | Read_code | Description                   |
|---------|-----------|-------------------------------|
| 799     | G20..00   | Essential hypertension        |
| 1894    | G201.00   | Benign essential hypertension |
| 2666    | 14A2.00   | H/O: hypertension             |
| 3425    | 662O.00   | On treatment for hypertension |
| 3712    | G20z.11   | Hypertension NOS              |
| 4372    | G202.00   | Systolic hypertension         |

| Medcode | Read_code | Description                                                  |
|---------|-----------|--------------------------------------------------------------|
| 7329    | G24..00   | Secondary hypertension                                       |
| 10818   | G20z.00   | Essential hypertension NOS                                   |
| 12680   | 8CR4.00   | Hypertension clinical management plan                        |
| 15377   | G200.00   | Malignant essential hypertension                             |
| 16059   | G24z.00   | Secondary hypertension NOS                                   |
| 16565   | 6627      | Good hypertension control                                    |
| 18482   | 662c.00   | Hypertension six month review                                |
| 18590   | 662b.00   | Moderate hypertension control                                |
| 19070   | 662d.00   | Hypertension annual review                                   |
| 21826   | 662F.00   | Hypertension treatm. started                                 |
| 25371   | G241000   | Secondary benign renovascular hypertension                   |
| 27511   | 6628      | Poor hypertension control                                    |
| 30776   | 6629      | Hypertension:follow-up default                               |
| 31387   | G24z000   | Secondary renovascular hypertension NOS                      |
| 31755   | G240.00   | Secondary malignant hypertension                             |
| 34744   | G244.00   | Hypertension secondary to endocrine disorders                |
| 42229   | G24zz00   | Secondary hypertension NOS                                   |
| 44549   | L128.00   | Pre-exist hypertension compl preg childbirth and puerperium  |
| 51635   | G241z00   | Secondary benign hypertension NOS                            |
| 57288   | G241.00   | Secondary benign hypertension                                |
| 59383   | G240000   | Secondary malignant renovascular hypertension                |
| 73293   | G240z00   | Secondary malignant hypertension NOS                         |
| 83473   | G203.00   | Diastolic hypertension                                       |
| 85944   | 7Q01.00   | High cost hypertension drugs                                 |
| 97533   | Gyu2100   | [X]Hypertension secondary to other renal disorders           |
| 98230   | 67H8.00   | Lifestyle advice regarding hypertension                      |
| 101649  | 7Q01y00   | Other specified high cost hypertension drugs                 |
| 102406  | 662P000   | Hypertension 9 month review                                  |
| 102458  | Gyu2000   | [X]Other secondary hypertension                              |
| 105274  | G28..00   | Stage 2 hypertension (NICE - Nat Ins for Hth Clin Excl 2011) |
| 105316  | G25..11   | Stage 1 hypertension                                         |
| 105371  | G25..00   | Stage 1 hypertension (NICE - Nat Ins for Hth Clin Excl 2011) |
| 105480  | G27..00   | Hypertension resistant to drug therapy                       |
| 105487  | G26..11   | Severe hypertension                                          |



| Medcode | Read_code | Description                                                |
|---------|-----------|------------------------------------------------------------|
| 105989  | G26..00   | Severe hypertension (Nat Inst for Health Clinical Ex 2011) |
| 61166   | G21z000   | Hypertensive heart disease NOS without CCF                 |
| 61660   | G211000   | Benign hypertensive heart disease without CCF              |
| 95334   | G210000   | Malignant hypertensive heart disease without CCF           |

## 16. Codes to identify open and closed tibial shaft fracture

| Medcode | Read_code | Description                                              |
|---------|-----------|----------------------------------------------------------|
| 20678   | S333200   | Open fracture of tibia and fibula, shaft                 |
| 28068   | S333.00   | Open fracture of tibia/fibula, shaft                     |
| 28118   | S333000   | Open fracture shaft of tibia                             |
| 28198   | S333z00   | Open fracture of tibia and fibula, shaft, NOS            |
| 28233   | S33y.00   | Open fracture of tibia and fibula, unspecified part, NOS |
| 29084   | S33y200   | Open fracture of tibia and fibula, unspecified part      |
| 29164   | S33y000   | Open fracture of tibia, unspecified part, NOS            |

| Medcode | Read_code | Description                                                |
|---------|-----------|------------------------------------------------------------|
| 971     | S33x000   | Closed fracture of tibia, unspecified part, NOS            |
| 4572    | S33x200   | Closed fracture of tibia and fibula, unspecified part      |
| 29109   | S33x.00   | Closed fracture of tibia and fibula, unspecified part, NOS |
| 29121   | S332.00   | Closed fracture of tibia/fibula, shaft                     |
| 33520   | S332200   | Closed fracture of tibia and fibula, shaft                 |
| 34021   | S332000   | Closed fracture shaft of tibia                             |
| 41971   | S33xz00   | Closed fracture of tibia and fibula, unspecified part, NOS |
| 55464   | S332z00   | Closed fracture of tibia and fibula, shaft, NOS            |

| OPCS-4 | Description                          | Open/closed fracture |
|--------|--------------------------------------|----------------------|
| S571   | Debridement of skin NEC              | Open                 |
| W332   | Debridement of open fracture of bone | Open                 |
| T963   | Debridement of soft tissue NEC       | Open                 |
| W336   | Debridement of bone NEC              | Open                 |

| ICD-10 | Description                                             | Open/closed fracture |
|--------|---------------------------------------------------------|----------------------|
| T14.1  | Open wound of unspecified body region                   | Open                 |
| T01.3  | Open wounds involving multiple regions of lower limb(s) | Open                 |
| S81.7  | Multiple open wounds of lower leg                       | Open                 |

| ICD-10 | Description                                              | Open/closed fracture |
|--------|----------------------------------------------------------|----------------------|
| S81.8  | Open wound of other parts of lower leg                   | Open                 |
| S81.9  | Open wound of lower leg, part unspecified                | Open                 |
| T93.0  | Sequelae of open wound of lower limb                     | Open                 |
| T93.2  | Sequelae of other fractures of lower limb                | Open                 |
| T01.9  | Multiple open wounds, unspecified                        | Open                 |
| T13.1  | Open wound of lower limb, level unspecified              | Open                 |
| T01.8  | Open wounds involving other combinations of body regions | Open                 |
| T94.0  | Sequelae of injuries involving multiple body regions     | Open                 |
| T94.1  | Sequelae of injuries, not specified by body region       | Open                 |
| T12.1  | Fracture of lower limb, level unspecified, open          | Open                 |

17. Read codes to identify Charlson comorbidity index

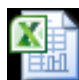

Microsoft Excel 2003  
Worksheet

18. OPCS Codes to identify reoperations

| OPCS-4 | Description                                                                          |
|--------|--------------------------------------------------------------------------------------|
| W242   | Closed reduction of fracture of long bone and rigid internal fixation NEC            |
| O172   | Remanipulation of fracture of long bone and rigid internal fixation NEC              |
| O173   | Remanipulation of fracture of long bone and flexible internal fixation HFQ           |
| O175   | Remanipulation of fragment of bone and fixation using screw                          |
| O178   | Other specified secondary closed reduction of fracture of bone and internal fixation |
| O179   | Unspecified secondary closed reduction of fracture of bone and internal fixation     |
| W231   | Secondary open reduction of fracture of bone and intramedullary fixation HFQ         |
| W232   | Secondary open reduction of fracture of bone and extramedullary fixation HFQ         |
| W236   | Secondary open reduction of fracture of bone and internal fixation HFQ               |
| W248   | Other specified closed reduction of fracture of bone and internal fixation           |
| W249   | Unspecified closed reduction of fracture of bone and internal fixation               |
| W281   | Application of internal fixation to bone NEC                                         |
| W282   | Adjustment to internal fixation of bone NEC                                          |
| W283   | Removal of internal fixation from bone NEC                                           |
| W288   | Other specified other internal fixation of bone                                      |
| W289   | Unspecified other internal fixation of bone                                          |

| OPCS-4 | Description                                                                       |
|--------|-----------------------------------------------------------------------------------|
| W235   | Secondary open reduction of fracture of bone and external fixation HFQ            |
| W252   | Closed reduction of fracture of bone and fixation using functional bracing system |
| W253   | Remanipulation of fracture of bone and external fixation HFQ                      |
| W258   | Other specified closed reduction of fracture of bone and external fixation        |
| W259   | Unspecified closed reduction of fracture of bone and external fixation            |
| W301   | Application of external fixation to bone NEC                                      |
| W302   | Adjustment to external fixation of bone NEC                                       |
| W303   | Removal of external fixation from bone NEC                                        |
| W304   | Application of external ring fixation to bone NEC                                 |
| W308   | Other specified other external fixation of bone                                   |
| W309   | Unspecified other external fixation of bone                                       |
| W35.3  | Removal of implanted substance from bone                                          |
| W32    | Other graft of bone                                                               |
| W32.1  | Prepared graft of bone                                                            |
| W32.2  | Allograft of bone NEC                                                             |
| W32.3  | Xenograft of bone                                                                 |
| W32.4  | Synthetic graft of bone                                                           |
| W32.5  | Cancellous chip allograft of bone                                                 |
| W32.8  | Other specified other graft of bone                                               |
| W32.9  | Unspecified other graft of bone                                                   |
| S31.3  | Revision of flap of skin NEC                                                      |
