# Supplementary material for: The economic burden of infections following intramedullary nailing for a tibial shaft fracture in England
Source: PubMed Central journal article supplement — BMJ Open. 2020 Aug 26;10(8):e035404. doi: 10.1136/bmjopen-2019-035404 (PMC7451536; doi:10.1136/bmjopen-2019-035404), 2020-08-26
Supplement: bmjopen-2019-035404supp002.pdf [file bmjopen-2019-035404supp002.pdf]

## Additional file 2: Baseline and results at all time points

Table C1. Patient demographic and clinical characteristics at all time points

|                                                      | All enrolled patients (N=805) | Index stay           |                  |                      | 30 days              |                  |                      | 90 days              |                  |                      | 1 year               |                  |                      | 2 years              |                  |                      |
|------------------------------------------------------|-------------------------------|----------------------|------------------|----------------------|----------------------|------------------|----------------------|----------------------|------------------|----------------------|----------------------|------------------|----------------------|----------------------|------------------|----------------------|
|                                                      |                               | No infection (N=775) | Infection (N=30) | p-value <sup>a</sup> | No infection (N=736) | Infection (N=64) | p-value <sup>a</sup> | No infection (N=699) | Infection (N=71) | p-value <sup>a</sup> | No infection (N=606) | Infection (N=80) | p-value <sup>a</sup> | No infection (N=509) | Infection (N=79) | p-value <sup>a</sup> |
| <b>Demographics</b>                                  |                               |                      |                  |                      |                      |                  |                      |                      |                  |                      |                      |                  |                      |                      |                  |                      |
| Age (years), mean (SD)                               | 40.8 (17.2)                   | 40.7 (16.8)          | 43.0 (23.9)      | 0.61                 | 40.5 (16.9)          | 44.0 (19.1)      | 0.17                 | 40.7 (16.9)          | 43.8 (19.1)      | 0.20                 | 40.7 (16.8)          | 45.1 (19.1)      | 0.06                 | 40.5 (16.4)          | 46.4 (20.0)      | 0.02                 |
| Gender, n (%)                                        |                               |                      |                  | 0.84                 |                      |                  | 1.00                 |                      |                  | 1.00                 |                      |                  | 0.89                 |                      |                  | 1.00                 |
| Male                                                 | 590 (73.3)                    | 569 (73.4)           | 21 (70.0)        |                      | 539 (73.2)           | 47 (73.4)        |                      | 508 (72.7)           | 52 (73.2)        |                      | 438 (72.3)           | 59 (73.8)        |                      | 368 (72.3)           | 57 (72.2)        |                      |
| <b>Clinical history/comorbidities</b>                |                               |                      |                  |                      |                      |                  |                      |                      |                  |                      |                      |                  |                      |                      |                  |                      |
| Charlson score, mean (SD)                            | 0.04 (0.23)                   | 0.04 (0.24)          | 0.00 (0.00)      | <0.001               | 0.04 (0.24)          | 0.02 (0.12)      | 0.22                 | 0.04 (0.3)           | 0.01 (0.12)      | 0.13                 | 0.04 (0.24)          | 0.01 (0.11)      | 0.11                 | 0.03 (0.22)          | 0.01 (0.11)      | 0.25                 |
| Smoker, n (%)                                        | 256 (31.8)                    | 247 (31.9)           | 9 (30.0)         | 0.99                 | 239 (32.5)           | 17 (26.6)        | 0.41                 | 233 (33.3)           | 18 (25.4)        | 0.22                 | 202 (33.3)           | 20 (25.0)        | 0.17                 | 160 (31.4)           | 19 (24.1)        | 0.23                 |
| Diabetes, n (%)                                      | 27 (3.4)                      | 27 (3.5)             | 0 (0.0)          | 0.62                 | 26 (3.5)             | 1 (1.6)          | 0.72                 | 26 (3.7)             | 1 (1.4)          | 0.50                 | 21 (3.5)             | 3 (3.8)          | 0.75                 | 15 (3.0)             | 3 (3.8)          | 0.72                 |
| COPD, n (%)                                          | 8 (1.0)                       | 8 (1.0)              | 0 (0.0)          | 1.00                 | 8 (1.1)              | 0 (0.0)          | 1.00                 | 7 (1.0)              | 0 (0.0)          | 1.00                 | 6 (1.0)              | 1 (1.3)          | 0.58                 | 3 (0.6)              | 1 (1.3)          | 0.44                 |
| Congestive heart failure, n (%)                      | 2 (0.3)                       | 2 (0.3)              | 0 (0.0)          | 1.00                 | 2 (0.3)              | 0 (0.0)          | 1.00                 | 1 (0.1)              | 0 (0.0)          | 1.00                 | 0 (0.0)              | 0 (0.0)          | NA                   | 0 (0.0)              | 0 (0.0)          | NA                   |
| Hypertension, n (%)                                  | 12 (1.5)                      | 12 (1.6)             | 0 (0.0)          | 1.00                 | 12 (1.6)             | 0 (0.0)          | 0.61                 | 12 (1.7)             | 0 (0.0)          | 0.62                 | 10 (1.7)             | 0 (0.0)          | 0.62                 | 7 (1.4)              | 0 (0.0)          | 0.60                 |
| Compartment syndrome, n (%)                          | 27 (3.4)                      | 22 (2.8)             | 5 (16.7)         | 0.00                 | 19 (2.6)             | 8 (12.5)         | <0.05                | 18 (2.6)             | 8 (11.3)         | <0.05                | 17 (2.8)             | 9 (11.2)         | 0.00                 | 15 (3.0)             | 8 (10.1)         | <0.05                |
| <b>Index episode</b>                                 |                               |                      |                  |                      |                      |                  |                      |                      |                  |                      |                      |                  |                      |                      |                  |                      |
| Year of intramedullary nailing, mean (SD)            | 2009 (3.6)                    | 2009 (3.6)           | 2009 (3.6)       | 0.72                 | 2009 (3.6)           | 2009 (3.6)       | 0.99                 | 2009 (3.6)           | 2009 (3.6)       | 0.74                 | 2008 (3.4)           | 2008 (3.4)       | 0.99                 | 2008 (3.1)           | 2008 (3.1)       | 0.85                 |
| Inpatient waiting time (days) for surgery, mean (SD) | 1.4 (2.4)                     | 1.4 (2.4)            | 0.7 (2.4)        | 0.14                 | 1.4 (2.4)            | 0.7 (1.7)        | <0.05                | 1.4 (2.5)            | 0.8 (1.7)        | <0.05                | 1.4 (2.4)            | 0.6 (1.0)        | <0.001               | 1.4 (2.2)            | 0.6 (1.0)        | <0.001               |
| Fracture type, n (%)                                 |                               |                      |                  | <0.001               |                      |                  | <0.001               |                      |                  | <0.001               |                      |                  | <0.001               |                      |                  | <0.001               |
| Closed fracture                                      | 663 (82.4)                    | 648 (83.6)           | 15 (50.0)        |                      | 624 (84.8)           | 35 (54.7)        |                      | 595 (85.1)           | 42 (59.2)        |                      | 524 (86.5)           | 49 (61.3)        |                      | 438 (86.1)           | 52 (65.8)        |                      |

|                                                                                          | All enrolled patients (N=805) | Index stay           |                  |                      | 30 days              |                  |                      | 90 days              |                  |                      | 1 year               |                  |                      | 2 years              |                  |                      |
|------------------------------------------------------------------------------------------|-------------------------------|----------------------|------------------|----------------------|----------------------|------------------|----------------------|----------------------|------------------|----------------------|----------------------|------------------|----------------------|----------------------|------------------|----------------------|
|                                                                                          |                               | No infection (N=775) | Infection (N=30) | p-value <sup>a</sup> | No infection (N=736) | Infection (N=64) | p-value <sup>a</sup> | No infection (N=699) | Infection (N=71) | p-value <sup>a</sup> | No infection (N=606) | Infection (N=80) | p-value <sup>a</sup> | No infection (N=509) | Infection (N=79) | p-value <sup>a</sup> |
| Received ≥1 prescription for antibiotics in the 12 months prior to the index stay, n (%) | 60 (7.5)                      | 60 (7.7)             | 0 (0.0)          | 0.16                 | 57 (7.7)             | 3 (4.7)          | 0.47                 | 56 (8.0)             | 3 (4.2)          | 0.36                 | 47 (7.8)             | 4 (5.0)          | 0.51                 | 35 (6.9)             | 5 (6.3)          | 1.000                |
| Received ≥1 prescription for opioids in the 12 months prior to the index stay, n (%)     | 16 (2.0)                      | 15 (1.9)             | 1 (3.3)          | 0.46                 | 15 (2.0)             | 1 (1.6)          | 1.00                 | 15 (2.2)             | 1 (1.4)          | 1.00                 | 11 (1.8)             | 2 (2.5)          | 0.66                 | 8 (1.6)              | 2 (2.5)          | 0.63                 |

Abbreviations: COPD, chronic obstructive pulmonary disease; NA, not applicable; SD, standard deviation.

<sup>a</sup> No infection versus infection, t-tests were performed for comparison of continuous variables and chi-squared (or Fisher exact tests when n was <5) for comparison of categorical variables.

**Table D1. Comparative results at all time points**

| Time period                                                               | Endpoint               | Bivariate analysis, mean (SD) |                             | Multivariate analysis, mean (95% CI) |                      | Absolute difference (multivariate analysis) |
|---------------------------------------------------------------------------|------------------------|-------------------------------|-----------------------------|--------------------------------------|----------------------|---------------------------------------------|
|                                                                           |                        | Infection                     | No infection                | Infection                            | No infection         |                                             |
| Index stay<br><br>( <i>N</i> infection = 30; <i>N</i> no infection = 775) | Total costs (£)        | 11,695 (6,553)                | 6,669 (3,133; $p < 0.001$ ) | 10,384 (8,900, 12,116)               | 6,603 (6,411, 6,802) | 3,781 $p < 0.001$                           |
|                                                                           | Inpatient costs (£)    | 11,695 (6,553)                | 6,669 (3,133; $p < 0.001$ ) | 10,384 (8,900, 12,116)               | 6,603 (6,411, 6,802) | 3,781 $p < 0.001$                           |
|                                                                           | LOS (days)             | 22.6 (20.0)                   | 9.7 (12.1; $p < 0.001$ )    | 17.6 (13.0, 23.7)                    | 8.5 (8.0, 9.0)       | 9.05 $p < 0.001$                            |
|                                                                           | ICU LOS (days)         | 1.5 (8.2)                     | 0.1 (1.1; $p = 0.53$ )      | 0.1 (0.1, 0.2)                       | 0.0 (0.0, 0.01)      | 0.115 $p < 0.001$                           |
|                                                                           | Reoperations (number)  | 0.3 (0.8)                     | 0.0 (0.1; $p < 0.001$ )     | 0.1 (0.0, 0.2)                       | 0.0 (0.0, 0.0)       | 0.070 $p < 0.001$                           |
|                                                                           | Reoperations (rate, %) | 13.3                          | 1.3 ( $p < 0.001$ )         | 9.7 (3.1, 26.3)                      | 1.1 (0.5, 2.1)       | 8.6 $p < 0.001$                             |

| Time period                                                                         | Endpoint                                          | Bivariate analysis, mean (SD) |                        | Multivariate analysis, mean (95% CI) |                         | Absolute difference (multivariate analysis) |
|-------------------------------------------------------------------------------------|---------------------------------------------------|-------------------------------|------------------------|--------------------------------------|-------------------------|---------------------------------------------|
|                                                                                     |                                                   | Infection                     | No infection           | Infection                            | No infection            |                                             |
| Index stay + 30 days post-discharge<br><br>(N infection = 64; N no infection = 736) | Total costs (£)                                   | 12,673 (7,345)                | 7,089 (3,588; p<0.001) | 11,257 (10,045, 12,615)              | 7,017 (6,792, 7,248)    | 4,241 p<0.001                               |
|                                                                                     | Inpatient costs (£)                               | 12,367 (7,290)                | 6,829 (3,397; p<0.001) | 11,008 (9,818, 12,343)               | 6,768 (6,551, 6,993)    | 4,240 p<0.001                               |
|                                                                                     | Hospital outpatient/ambulatory costs (£)          | 215 (116)                     | 155 (94; p=0.4)        | 245 (145, 345)                       | 152 (125, 179)          | 93 p=0.07                                   |
|                                                                                     | Primary care costs (£)                            | 289 (555)                     | 254 (673, p=0.24)      | 243 (139, 426)                       | 205 (175, 241)          | 38 p=0.57                                   |
|                                                                                     | LOS (days)                                        | 19.3 (19.2)                   | 10.1 (12.2; p<0.001)   | 15.0 (12.1, 18.6)                    | 8.9 (8.4, 9.5)          | 6.1 p<0.001                                 |
|                                                                                     | ICU LOS (days)                                    | 0.7 (5.6)                     | 0.1 (1.1; p=0.4)       | 0.1 (0.0, 0.1)                       | 0.0 (0.0, 0.0)          | 0.0 p<0.001                                 |
|                                                                                     | Readmissions (number)                             | 0.6 (0.6)                     | 0.1 (0.3; p<0.001)     | 0.5 (0.4, 0.7)                       | 0.1 (0.1, 0.1)          | 0.4 p<0.001                                 |
|                                                                                     | Readmissions (rate, %)                            | 48.4                          | 7.6 (p<0.001)          | 44.1 (31.5, 57.5)                    | 7.1 (5.4, 9.2)          | 37.0 p<0.001                                |
|                                                                                     | Reoperations (number)                             | 0.2 (0.7)                     | 0.0 (0.1; p<0.001)     | 0.1 (0.1, 0.2)                       | 0.0 (0.0, 0.0)          | 0.1 p<0.001                                 |
|                                                                                     | Reoperations (rate, %)                            | 14.1                          | 1.6 (p<0.001)          | 11.5 (5.4, 22.9)                     | 1.3 (0.7, 2.5)          | 10.2 p<0.001                                |
|                                                                                     | Amputation (rate, %)                              | 3.1                           | 0.1 (p<0.01)           | Not feasible                         |                         |                                             |
|                                                                                     | Hospital outpatient/ambulatory referrals (number) | 1.6 (0.9)                     | 1.2 (0.5; p=0.28)      | 1.6 (1.1, 2.2)                       | 1.21 (1.0, 1.4)         | 0.45 p=0.13                                 |
|                                                                                     |                                                   | Total costs (£)               | 13,621 (7,827)         | 7,527 (4,326; p<0.001)               | 11,949 (10,634, 13,427) | 7,423 (7,160, 7,696)                        |
| Inpatient costs (£)                                                                 |                                                   | 13,154 (7,673)                | 7,157 (4,111; p<0.001) | 11,532 (10,246, 12,979)              | 7,072 (6,818, 7,336)    | 4,459 p<0.001                               |

| Time period                                                                                        | Endpoint                                          | Bivariate analysis, mean (SD) |                        | Multivariate analysis, mean (95% CI) |                      | Absolute difference (multivariate analysis) |
|----------------------------------------------------------------------------------------------------|---------------------------------------------------|-------------------------------|------------------------|--------------------------------------|----------------------|---------------------------------------------|
|                                                                                                    |                                                   | Infection                     | No infection           | Infection                            | No infection         |                                             |
| Index stay + 90 days post-discharge<br><br>( <i>N</i> infection = 71; <i>N</i> no infection = 699) | Hospital outpatient/ambulatory costs (£)          | 183 (87)                      | 171 (135; p=0.53)      | 194 (125, 264)                       | 170 (141, 198)       | 25 p=0.515                                  |
|                                                                                                    | Primary care costs (£)                            | 436 (637)                     | 353 (737; p<0.05)      | 428 (290, 630)                       | 299 (264, 338)       | 129 p=0.084                                 |
|                                                                                                    | LOS (days)                                        | 21.7 (21.5)                   | 11.1 (14.6 p<0.001)    | 16.4 (13.2, 20.4)                    | 9.6 (9.0, 10.3)      | 6.8 p<0.001                                 |
|                                                                                                    | ICU LOS (days)                                    | 0.7 (5.3)                     | 0.1 (1.2; p=0.576)     | 0.0 (0.0, 0.1)                       | 0.0 (0.0, 0.0)       | 0.0 p<0.001                                 |
|                                                                                                    | Readmissions (number)                             | 0.8 (0.8)                     | 0.2 (0.6; p<0.001)     | 0.7 (0.5, 0.9)                       | 0.2 (0.2, 0.2)       | 0.5 p<0.001                                 |
|                                                                                                    | Readmissions (rate, %)                            | 57.7                          | 17.2 (p<0.001)         | 5.4 (41.5, 65.9)                     | 16.5 (13.9, 19.5)    | 37.4 p<0.001                                |
|                                                                                                    | Reoperations (number)                             | 0.3 (0.7)                     | 0.1 (0.3; p<0.001)     | 0.2 (0.1, 0.3)                       | 0.1 (0.0, 0.1)       | 0.1 p=0.001                                 |
|                                                                                                    | Reoperations (rate, %)                            | 18.3                          | 6.0 (p<0.001)          | 14.3 (7.7, 25.0)                     | 5.4 (3.9, 7.4)       | 9.0 p<0.05                                  |
|                                                                                                    | Amputation (rate, %)                              | 2.8                           | 0.1 (p<0.05)           | Not feasible                         |                      |                                             |
|                                                                                                    | Hospital outpatient/ambulatory referrals (number) | 1.2 (0.6)                     | 1.4 (0.9; p=0.92)      | 1.3 (0.9, 1.7)                       | 1.4 (1.2, 1.5)       | 0.0 p=0.835                                 |
| Index stay + 1 year post-discharge<br><br>( <i>N</i> infection = 80; <i>N</i> no infection = 606)  | Total costs (£)                                   | 16,800 (12,663)               | 8,435 (5,330; p<0.001) | 14,756 (13,123, 16,593)              | 8,279 (7,946, 8,626) | 6,478 p<0.001                               |
|                                                                                                    | Inpatient costs (£)                               | 15,580 (11,872)               | 7,746 (5,060; p<0.001) | 13,672 (12,122, 15,420)              | 7,616 (7,301, 7,944) | 6,056 p<0.001                               |
|                                                                                                    | Hospital outpatient/ambulatory costs (£)          | 250 (251)                     | 239 (218; p=0.77)      | 220 (151, 288)                       | 244 (211, 277)       | 25 p=0.516                                  |
|                                                                                                    | Primary care costs (£)                            | 1,139 (1,657)                 | 630 (903; p<0.001)     | 1,017 (769, 1,344)                   | 551 (498, 609)       | 466 p<0.001                                 |

| Time period                                                                         | Endpoint                                          | Bivariate analysis, mean (SD) |                        | Multivariate analysis, mean (95% CI) |                      | Absolute difference (multivariate analysis) |
|-------------------------------------------------------------------------------------|---------------------------------------------------|-------------------------------|------------------------|--------------------------------------|----------------------|---------------------------------------------|
|                                                                                     |                                                   | Infection                     | No infection           | Infection                            | No infection         |                                             |
|                                                                                     | LOS (days)                                        | 28.5 (33.3)                   | 12.6 (21.3; p<0.001)   | 21.9 (17.3, 27.7)                    | 10.5 (9.7, 11.4)     | 11.4 p<0.001                                |
|                                                                                     | ICU LOS (days)                                    | 0.2 (1.5)                     | 0.1 (1.1; p=0.758)     | 0.0 (0.0, 0.0)                       | 0.0 (0.0, 0.0)       | 0.0 p=0.914                                 |
|                                                                                     | Readmissions (number)                             | 1.5 (1.5)                     | 0.5 (0.9; p<0.001)     | 1.5 (1.2, 1.8)                       | 0.5 (0.4, 0.6)       | 1.0 p<0.001                                 |
|                                                                                     | Readmissions (rate, %)                            | 75                            | 36 (p<0.001)           | 74.4 (63.4, 83.0)                    | 35.9 (32.1, 39.9)    | 38.5 p<0.001                                |
|                                                                                     | Reoperations (number)                             | 0.6 (1.0)                     | 0.2 (0.5; p<0.001)     | 0.6 (0.5, 0.8)                       | 0.2 (0.2, 0.3)       | 0.4 p<0.001                                 |
|                                                                                     | Reoperations (rate, %)                            | 37.5                          | 21.3 (p<0.01)          | 38.6 (28.3, 50.0)                    | 20.3 (17.2, 23.8)    | 18.2 p<0.001                                |
|                                                                                     | Amputation (rate, %)                              | 2.5                           | 0.2 (p<0.05)           | Not feasible                         |                      |                                             |
|                                                                                     | Hospital outpatient/ambulatory referrals (number) | 1.8 (1.6)                     | 1.8 (1.5; p=0.66)      | 1.7 (1.2, 2.1)                       | 1.8 (1.6, 2.1)       | 0.2 p=0.44                                  |
| Index stay + 2 years post-discharge<br><br>(N infection = 79; N no infection = 509) | Total costs (£)                                   | 18,779 (14,929)               | 9,611 (6,284; p<0.001) | 16,626 (14,664, 18,849)              | 9,439 (8,998, 9,901) | 7,187 p<0.001                               |
|                                                                                     | Inpatient costs (£)                               | 16,900 (13,720)               | 8,573 (5,729; p<0.001) | 14,898 (13,106, 16,935)              | 8,447 (8,044, 8,871) | 6,451 p<0.001                               |
|                                                                                     | Hospital outpatient/ambulatory costs (£)          | 282 (296)                     | 275 (265; p=0.893)     | 264 (189, 338)                       | 277 (243, 310)       | 13 p=0.747                                  |
|                                                                                     | Primary care costs (£)                            | 1,758 (2,437)                 | 929 (1,179; p<0.01)    | 1,487 (1,149, 1,924)                 | 821 (742, 907)       | 666 p<0.001                                 |
|                                                                                     | LOS (days)                                        | 31.5 (38.1)                   | 13.4 (22.6; p<0.001)   | 24.6 (19.6, 30.8)                    | 11.3 (10.4, 12.3)    | 13.3 p<0.001                                |
|                                                                                     | ICU LOS (days)                                    | 0.2 (1.5)                     | 0.1 (1.2; p=0.24)      | 0.0 (0.0, 0.0)                       | 0.0 (0.0, 0.0)       | 0.0 p=0.20                                  |

| Time period | Endpoint                                          | Bivariate analysis, mean (SD) |                    | Multivariate analysis, mean (95% CI) |                   | Absolute difference (multivariate analysis) |
|-------------|---------------------------------------------------|-------------------------------|--------------------|--------------------------------------|-------------------|---------------------------------------------|
|             |                                                   | Infection                     | No infection       | Infection                            | No infection      |                                             |
|             | Readmissions (number)                             | 2.1 (2.3)                     | 1.0 (1.5; p<0.001) | 2.2 (1.9, 2.6)                       | 0.9 (0.8, 1.0)    | 1.3 p<0.001                                 |
|             | Readmissions (rate, %)                            | 77.2                          | 51.1 (p<0.001)     | 77.6 (67.0, 85.6)                    | 51.4 (46.9, 56.8) | 26.3 p<0.001                                |
|             | Reoperations (number)                             | 0.8 (1.1)                     | 0.4 (0.7; p<0.01)  | 0.8 (0.6, 1.0)                       | 0.4 (0.3, 0.4)    | 0.4 p<0.001                                 |
|             | Reoperations (rate, %)                            | 46.8                          | 32.4 (p<0.05)      | 49.0 (37.7, 60.3)                    | 31.2 (27.2, 35.5) | 17.7 p<0.05                                 |
|             | Amputation (rate, %)                              | 3.8                           | 0.2 (p<0.01)       | Not feasible                         |                   |                                             |
|             | Hospital outpatient/ambulatory referrals (number) | 2.0 (2.0)                     | 2.1 (1.9; p=0.55)  | 2.0 (1.5, 2.5)                       | 2.1 (1.8, 2.3)    | 0.1 p=0.82                                  |

Abbreviations: CI, confidence interval; ICU, intensive care unit; LOS, length of stay; NA, not applicable; SD, standard deviation.

**Table D2. 1 year cost breakdown (£) – inpatient setting**

| Endpoint               | Bivariate analysis, mean (SD) |               |
|------------------------|-------------------------------|---------------|
|                        | Infection                     | No infection  |
| Total inpatient costs  | 15,580 (11,872)               | 7,746 (5,060) |
| HRG costs              | 15,488 (11,743)               | 7,702 (4,985) |
| Unbundled HRG costs    | 36 (116)                      | 16 (72)       |
| Critical care costs    | 56 (381)                      | 26 (208)      |
| Specialised care costs | 0 (0)                         | 2 (42)        |

Abbreviations: HRG, Healthcare Resource Group; SD, standard deviation.

**Table D3. 1 year healthcare resource use and cost breakdown – primary care**

| Endpoint                         | Bivariate analysis, mean (SD) |              |
|----------------------------------|-------------------------------|--------------|
|                                  | Infection                     | No infection |
| Costs (£)                        |                               |              |
| Total primary care costs         | 1,139 (1,657)                 | 630 (903)    |
| Total drug costs                 | 368 (1,031)                   | 198 (681)    |
| Total test costs                 | 147 (247)                     | 95 (186)     |
| Imaging test costs               | 27 (71)                       | 25 (72)      |
| Total consultation costs         | 625 (721)                     | 338 (334)    |
| GP                               | 322 (317)                     | 212 (225)    |
| Nurse                            | 140 (362)                     | 36 (75)      |
| Other healthcare professional    | 120 (243)                     | 55 (121)     |
| Administrative                   | 42 (36)                       | 35 (30)      |
| Healthcare resource use (number) |                               |              |
| Total tests                      | 25 (52)                       | 14 (30)      |
| Imaging tests                    | 0.4 (0.8)                     | 0.5 (1.5)    |
| Total consultations              | 52 (51)                       | 33 (25)      |
| GP                               | 14 (13)                       | 9 (9)        |
| Nurse                            | 10 (21)                       | 3 (5)        |
| Other healthcare professional    | 9 (17)                        | 4 (8)        |
| Administrative                   | 22 (18)                       | 18 (15)      |

Abbreviations: GP, General Practitioner; SD, standard deviation.



**Table D4. Subgroup analyses of 1 year inpatient costs – infection type (deep versus superficial)**

|                                                   | <b>No infection<br/>(N=606)</b> | <b>Superficial infection<br/>(N=54)</b> | <b>Deep infection<br/>(N=26)</b> |
|---------------------------------------------------|---------------------------------|-----------------------------------------|----------------------------------|
| Bivariate analysis, mean (SD)                     | £7,746 (£5,060)                 | £14,232 (£8,633)                        | £18,378 (£16,592)                |
| Multivariate analysis, mean (95% CI) <sup>a</sup> | £7,614 (£7,301, £7,941)         | £12,814 (£11,093, £14,803)              | £15,513 (£12,640, £19,040)       |

Abbreviations: CI, confidence interval; COPD, chronic obstructive pulmonary disease; SD, standard deviation.

<sup>a</sup> Adjusted for open/closed fracture, age, smoker, year at index, diabetes, COPD, days prior nailing and compartment syndrome.

**Table D5. Subgroup analyses of 1 year inpatient costs – fracture type (open versus closed)**

| <b>Fracture type</b>                              | <b>No infection<br/>(N=606)</b> |                          | <b>Infection<br/>(N=80)</b> |                            |
|---------------------------------------------------|---------------------------------|--------------------------|-----------------------------|----------------------------|
|                                                   | <b>Closed<br/>(N=524)</b>       | <b>Open<br/>(N=82)</b>   | <b>Closed<br/>(N=49)</b>    | <b>Open<br/>(N=31)</b>     |
| Bivariate analysis, mean (SD)                     | £7,433 (£3,957)                 | £9,741 (£9,247)          | £12,291 (£7,366)            | £20,778 (£15,451)          |
| Multivariate analysis, mean (95% CI) <sup>a</sup> | £7,278 (£6,956, £7,614)         | £9,495 (£8,469, £10,645) | £12,178 (£10,492, £14,136)  | £19,542 (£16,166, £23,623) |

Abbreviations: CI, confidence interval; COPD, chronic obstructive pulmonary disease; SD, standard deviation.

<sup>a</sup> Adjusted for age, smoker, year at index, diabetes, COPD, days prior nailing and compartment syndrome.

**Table D6. Sensitivity analyses**

| Time period                                                                                        | Endpoint              | Bivariate analysis, mean (SD) |                                | Multivariate analysis, mean (95% CI) |                      | Absolute difference (multivariate analysis) |
|----------------------------------------------------------------------------------------------------|-----------------------|-------------------------------|--------------------------------|--------------------------------------|----------------------|---------------------------------------------|
|                                                                                                    |                       | Infection                     | No infection                   | Infection                            | No infection         |                                             |
| Index stay<br><br>( <i>N</i> infection = 24; <i>N</i> no infection = 564)                          | Total costs (£)       | 12,554 (6,832)                | 6,580 (3,123; <i>p</i> <0.001) | 11,110 (9,328, 13,232)               | 6,517 (6,295, 6,747) | 4,593 <i>p</i> <0.001                       |
|                                                                                                    | LOS (days)            | 24.2 (20.9)                   | 9.4 (11.7; <i>p</i> <0.001)    | 18.6 (13.1, 26.4)                    | 8.5 (7.9, 9.1)       | 10.1 <i>p</i> <0.001                        |
|                                                                                                    | Reoperations (number) | 0.3 (0.9)                     | 0.0 (0.1; <i>p</i> <0.001)     | 0.1 (0.0, 0.3)                       | 0.0 (0.0, 0.0)       | 0.1 <i>p</i> <0.001                         |
|                                                                                                    | Reoperations (rate)   | 12.5                          | 1.6 ( <i>p</i> <0.01)          | 9.9 (2.7, 30.6)                      | 1.4 (0.7, 2.8)       | 8.5 <i>p</i> <0.05                          |
| Index stay + 30 days post-discharge<br><br>( <i>N</i> infection = 51; <i>N</i> no infection = 537) | Total costs (£)       | 12,957 (7,385)                | 7,077 (3,747; <i>p</i> <0.001) | 11,453 (10,016, 13,096)              | 7,010 (6,739, 7,292) | 4,444 <i>p</i> <0.001                       |
|                                                                                                    | LOS (days)            | 20.2 (19.4)                   | 10.0 (12.4; <i>p</i> <0.001)   | 15.6 (12.1, 20.0)                    | 9.1 (8.4, 9.8)       | 6.5 <i>p</i> <0.001                         |
|                                                                                                    | Readmissions (number) | 0.6 (0.6)                     | 0.1 (0.3; <i>p</i> <0.001)     | 0.5 (0.3, 0.7)                       | 0.1 (0.1, 0.1)       | 0.4 <i>p</i> <0.001                         |
|                                                                                                    | Readmissions (rate)   | 47.1                          | 8.4 ( <i>p</i> <0.001)         | 45.7 (32.0, 60.0)                    | 7.9 (5.9, 10.5)      | 37.8 <i>p</i> <0.001                        |
|                                                                                                    | Reoperations (number) | 0.3 (0.7)                     | 0.0 (0.2; <i>p</i> <0.001)     | 0.1 (0.1, 0.3)                       | 0.0 (0.0, 0.0)       | 0.1 <i>p</i> <0.001                         |
|                                                                                                    | Reoperations (rate)   | 13.7                          | 2.2 ( <i>p</i> <0.001)         | 11.7 (5.0, 25.3)                     | 1.8 (1.0, 3.4)       | 9.9 <i>p</i> <0.001                         |
| Index stay + 90 days post-discharge<br><br>( <i>N</i> infection = 59; <i>N</i> no infection = 529) | Total costs (£)       | 13,620 (7,762)                | 7,584 (4,622; <i>p</i> <0.001) | 11,869 (10,364, 13,593)              | 7,480 (7,160, 7,813) | 4,389 <i>p</i> <0.001                       |
|                                                                                                    | LOS (days)            | 21.9 (21.8)                   | 11.2 (15.2; <i>p</i> <0.001)   | 16.3 (12.7, 21.0)                    | 9.8 (9.1, 10.7)      | 6.5 <i>p</i> <0.001                         |
|                                                                                                    | Readmissions (number) | 0.8 (0.8)                     | 0.2 (0.5; <i>p</i> <0.001)     | 0.7 (0.5, 0.9)                       | 0.2 (0.2, 0.2)       | 0.5 <i>p</i> <0.001                         |

| Time period                                                                            | Endpoint              | Bivariate analysis, mean (SD) |                        | Multivariate analysis, mean (95% CI) |                       | Absolute difference (multivariate analysis) |
|----------------------------------------------------------------------------------------|-----------------------|-------------------------------|------------------------|--------------------------------------|-----------------------|---------------------------------------------|
|                                                                                        |                       | Infection                     | No infection           | Infection                            | No infection          |                                             |
|                                                                                        | Readmissions (rate)   | 57.6                          | 18.1 (p<0.001)         | 54.9 (41.1, 68.0)                    | 17.2 (14.1, 20.8)     | 37.7 p<0.001                                |
|                                                                                        | Reoperations (number) | 0.3 (0.7)                     | 0.1 (0.3; p<0.05)      | 0.2 (0.1, 0.3)                       | 0.1 (0.0, 0.1)        | 0.1 p<0.05                                  |
|                                                                                        | Reoperations (rate)   | 15.3                          | 7.0 (p<0.05)           | 11.1 (5.2, 22.0)                     | 6.1 (4.3, 8.7)        | 5.0 p=0.1438                                |
| Index stay + 1 year post-discharge<br><i>(N infection = 72; N no infection = 516)</i>  | Total costs (£)       | 16,788 (12,914)               | 8,449 (5,525; p<0.001) | 14,597 (12,841, 16,593)              | 8,294 (7,920, 8,686)  | 6,303 p<0.001                               |
|                                                                                        | LOS (days)            | 29.2 (34.6)                   | 12.3 (21.1; p<0.001)   | 22.5 (17.7, 28.5)                    | 10.3 (9.4, 11.2)      | 12.2 p<0.001                                |
|                                                                                        | Readmissions (number) | 1.5 (1.6)                     | 0.5 (0.9; p<0.001)     | 1.5 (1.2, 1.8)                       | 0.5 (0.4, 0.6)        | 1.0 p<0.001                                 |
|                                                                                        | Readmissions (rate)   | 75.0                          | 35.5 (p<0.001)         | 75.0 (63.6, 83.8)                    | 35.3 (31.2, 39.6)     | 39.7 p<0.001                                |
|                                                                                        | Reoperations (number) | 0.6 (0.9)                     | 0.2 (0.5; p<0.01)      | 0.5 (0.4, 0.7)                       | 0.2 (0.2, 0.3)        | 0.3 p<0.001                                 |
|                                                                                        | Reoperations (rate)   | 36.1                          | 21.7 (p<0.05)          | 37.4 (26.7, 49.5)                    | 20.7 (17.3, 24.5)     | 16.8 p<0.05                                 |
| Index stay + 2 years post-discharge<br><i>(N infection = 79; N no infection = 509)</i> | Total costs (£)       | 18,779 (14,929)               | 9,611 (6,284; p<0.001) | 16,626 (14,664, 18,849)              | 9,439 (8,998, 9,901), | 7,187 p<0.001                               |
|                                                                                        | LOS (days)            | 31.5 (38.1)                   | 13.4 (22.6; p<0.001)   | 24.6 (19.6, 30.8)                    | 11.3 (10.4, 12.3)     | 13.3 p<0.001                                |
|                                                                                        | Readmissions (number) | 2.1 (2.3)                     | 1.0 (1.5; p<0.001)     | 2.2 (1.9, 2.5)                       | 0.9 (0.8, 1.0)        | 1.3 p<0.001                                 |
|                                                                                        | Readmissions (rate)   | 77.2                          | 51.1 (p<0.001)         | 77.6 (67.0, 85.6)                    | 51.4 (46.9, 55.8)     | 26.3 p<0.001                                |
|                                                                                        | Reoperations (number) | 0.8 (1.1)                     | 0.4 (0.7; p<0.01)      | 0.8 (0.6, 1.0)                       | 0.4 (0.3, 0.5)        | 0.4 p<0.001                                 |

| Time period | Endpoint            | Bivariate analysis, mean (SD) |               | Multivariate analysis, mean (95% CI) |                   | Absolute difference (multivariate analysis) |
|-------------|---------------------|-------------------------------|---------------|--------------------------------------|-------------------|---------------------------------------------|
|             |                     | Infection                     | No infection  | Infection                            | No infection      |                                             |
|             | Reoperations (rate) | 46.8                          | 32.4 (p<0.05) | 49.0 (37.7, 60.3)                    | 31.2 (27.2, 35.5) | 17.7 p<0.05                                 |

Abbreviations: CI, confidence interval; LOS, length of stay; NA, not applicable; SD, standard deviation.
